# Supplementary material for: Modeling tool for calculating dietary iron bioavailability in iron-sufficient adults
Source: PubMed Central journal article supplement (PMC5533300; doi:10.3945/ajcn.116.147389), 2017-04-05

### Supplemental Figure 1: Participant flow chart

Numbers of participants recruited and excluded at various stages (missing data, raised CRP or ACT) in NANS (National Adult Nutrition Survey), NDNS (National Diet and Nutrition Survey), and NU-AGE (New dietary strategies addressing the specific needs of the elderly population for healthy aging in Europe), and the number of participants included in the final data analysis.

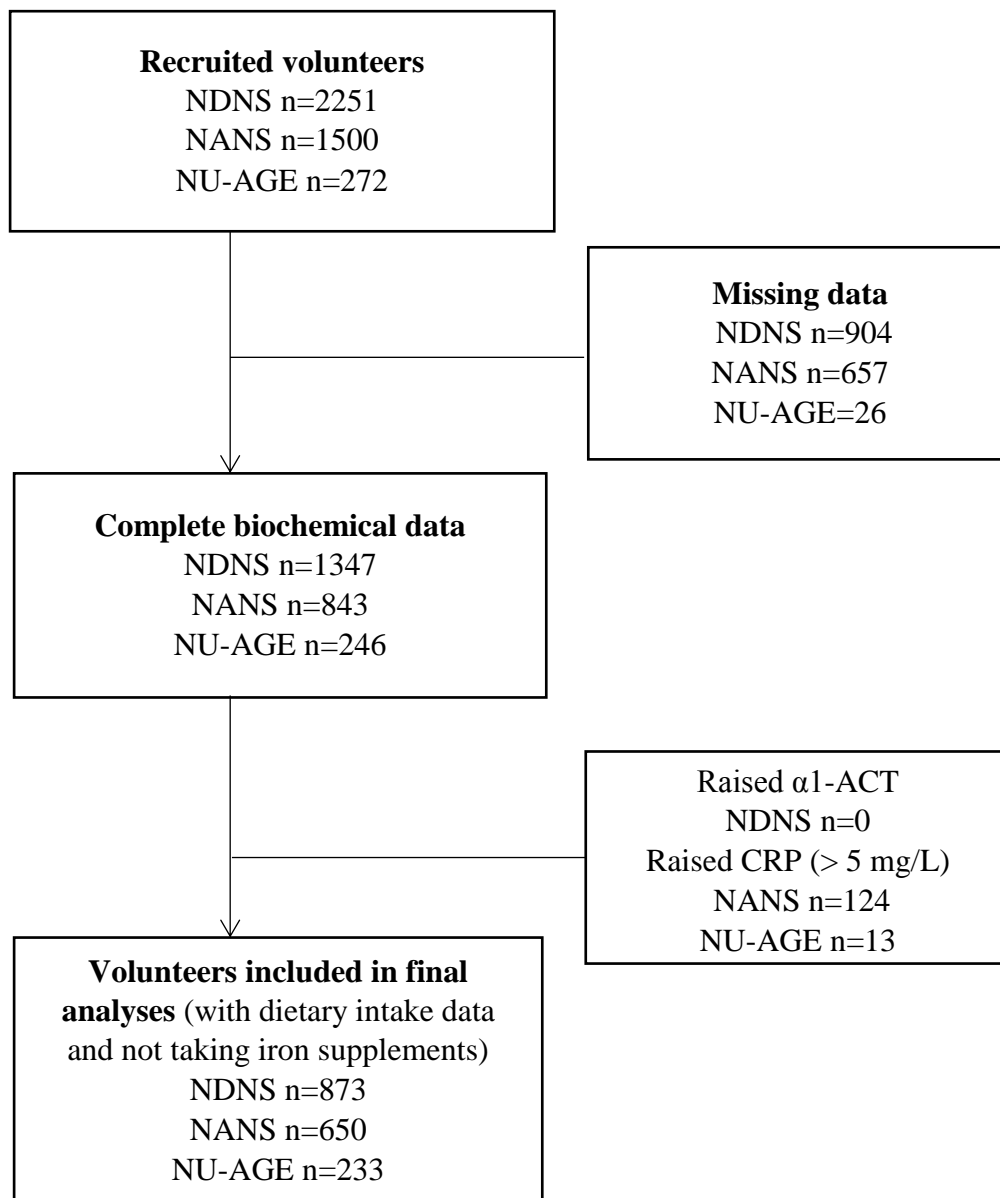

Supplement: 116.147389_ajcn147389SupplementaryData1.pdf [file 116.147389_ajcn147389SupplementaryData1.pdf]
