# Supplementary material for: Modeling tool for calculating dietary iron bioavailability in iron-sufficient adults
Source: PubMed Central journal article supplement (PMC5533300; doi:10.3945/ajcn.116.147389), 2017-04-05
Supplement: 116.147389_ajcn147389SupplementaryData2.pdf [file 116.147389_ajcn147389SupplementaryData2.pdf]

**Supplemental Table 1. Description of the main methods and characteristics for each of the included studies**

NDNS, National Diet and Nutrition Survey; NANS, National Adult Nutrition Survey; NU-AGE, New Dietary Strategies Addressing the Specific Needs of the Elderly Population for Healthy Ageing in Europe study

|                                        | NDNS                                                                                                                            | NANS                                                                                                                                                            | NU-AGE                                                                                                            |
|----------------------------------------|---------------------------------------------------------------------------------------------------------------------------------|-----------------------------------------------------------------------------------------------------------------------------------------------------------------|-------------------------------------------------------------------------------------------------------------------|
| <b>General</b>                         |                                                                                                                                 |                                                                                                                                                                 |                                                                                                                   |
| Full study title                       | National Diet and Nutrition Survey: adults aged 19 to 64 years                                                                  | National Adult Nutrition Survey                                                                                                                                 | New Dietary Strategies Addressing the Specific Needs of the Elderly Population for Healthy Ageing in Europe study |
| Country                                | Great Britain                                                                                                                   | Republic of Ireland                                                                                                                                             | Great Britain                                                                                                     |
| Responsible Institution(s)             | NatCen Social Research and MRC Human Nutrition Research                                                                         | Irish Universities Nutrition Alliance (IUNA)                                                                                                                    | University of East Anglia                                                                                         |
| Funding                                | Food Standards Agency, the Ministry of Agriculture, Fisheries and Food, the Department of Health                                | Department of Agriculture, Food & the Marine as part of the Food Institutional Research Measure under the Food for Health Research Initiative (FHRI).           | European Union Seventh Framework Programme                                                                        |
| Year(s)                                | 2000-2001                                                                                                                       | 2008-2010                                                                                                                                                       | 2012-2014                                                                                                         |
| Ethical approval                       | South Thames Multi-Centre Research Ethics Committee (2000) and subsequent approval from 93 NHS Local Research Ethics Committees | Clinical Research Ethics Committee of the Cork Teaching Hospitals, University College Cork and the Human Ethics Research Committee of University College Dublin | National Research Ethics Committee East of England                                                                |
| <b>Study design &amp; participants</b> |                                                                                                                                 |                                                                                                                                                                 |                                                                                                                   |
| Study design                           | Cross-sectional survey                                                                                                          | Cross-sectional survey                                                                                                                                          | Cross sectional survey of baseline randomised controlled trial data.                                              |

## Online Supplemental Material

|                                                       |                                                                                                                                                                     |                                                                                                                                               |                                                                                                                                                                                                                                                                                  |
|-------------------------------------------------------|---------------------------------------------------------------------------------------------------------------------------------------------------------------------|-----------------------------------------------------------------------------------------------------------------------------------------------|----------------------------------------------------------------------------------------------------------------------------------------------------------------------------------------------------------------------------------------------------------------------------------|
| Study duration or length of follow-up (if applicable) | N/A                                                                                                                                                                 | N/A                                                                                                                                           | 1 year                                                                                                                                                                                                                                                                           |
| Total number of participants recruited                | 2251 participants<br>1347 provided a blood sample and food diary                                                                                                    | 1500 participants<br>1138 provided a blood sample and food diary                                                                              | 272                                                                                                                                                                                                                                                                              |
| Inclusion criteria (participant characteristics)      | Living in private households, aged between 19 and 64 years. Where more than one eligible person was living in an address, one was randomly selected to participate. | Free-living adults aged 18 years or over                                                                                                      | Independently living adults aged 65-79 y.                                                                                                                                                                                                                                        |
| Exclusion criteria                                    | Pregnant or breastfeeding.                                                                                                                                          | Pregnant or breastfeeding                                                                                                                     | Clinically diagnosed chronic disease, use of corticosteroids or insulin medications, recent use of antibiotics or vaccinations, recent change in habitual medication, presence of food allergy or intolerance necessitating a special diet, presence of frailty or malnutrition. |
| Recruitment method                                    | Multi-stage random probability design using the Postcode Address File. 152 postal sectors were selected, with 40 postal addresses randomly selected from each       | Quota sampling following the approach used in the national census, utilising the names and addresses in the National Postal Service database. | Local advertisements, publicity, and general practitioner surgeries                                                                                                                                                                                                              |
| <b>Dietary assessment</b>                             |                                                                                                                                                                     |                                                                                                                                               |                                                                                                                                                                                                                                                                                  |
| Dietary assessment method(s)                          | Weighed food intake record and initial dietary interview                                                                                                            | Semi-weighted food diary                                                                                                                      | Estimated food intake record and initial dietary interview.                                                                                                                                                                                                                      |

## Online Supplemental Material

|                                     |                                                                                                                                                                                                                                                                                                                      |                                                                                                                      |                                                                                                                                      |
|-------------------------------------|----------------------------------------------------------------------------------------------------------------------------------------------------------------------------------------------------------------------------------------------------------------------------------------------------------------------|----------------------------------------------------------------------------------------------------------------------|--------------------------------------------------------------------------------------------------------------------------------------|
| Number of days/recalls              | 7 day record                                                                                                                                                                                                                                                                                                         | 4 consecutive days including 1 week-end day                                                                          | 7 days                                                                                                                               |
| <b>Biomarkers</b>                   |                                                                                                                                                                                                                                                                                                                      |                                                                                                                      |                                                                                                                                      |
| Samples collected                   | 24hr urine collection, blood sample                                                                                                                                                                                                                                                                                  | Urine sample, blood sample                                                                                           | 24hr urine collection, blood sample                                                                                                  |
| Iron biomarkers and methods         | <b>Serum ferritin:</b> Abbott IMx semi-automated analyser using a standard Microparticle Enzyme Immunoassay (MEIA) kit.<br><b>Hemoglobin:</b> Bayer H3 Haematology Analyser using a colorimeter at 546nm.                                                                                                            | <b>Serum ferritin:</b> Automated analyser (RX Daytona, Randox).<br><b>Hemoglobin:</b> Coulter LH700 series analyser. | <b>Serum ferritin:</b> Electrochemiluminescence immunoassay (Cobas 6000, Roche Diagnostics)<br><b>Hemoglobin:</b> Sysmex XN analyser |
| Markers of inflammation and methods | <b><math>\alpha</math>-1-antichymotrypsin:</b> Hitachi 912-based nephelometric assay                                                                                                                                                                                                                                 | hs-CRP: Automated analyser (RX Daytona, Randox).                                                                     | <b>CRP:</b> ProcartaPlex kits (Affimetrix)                                                                                           |
| <b>Additional information</b>       |                                                                                                                                                                                                                                                                                                                      |                                                                                                                      |                                                                                                                                      |
| Key references and web-pages        | All reports and appendices can be found at:<br><a href="http://tna.europarchive.org/20110116113217/http://www.food.gov.uk/science/dietary_surveys/ndnsdocuments/ndnspreviousreports">http://tna.europarchive.org/20110116113217/http://www.food.gov.uk/science/dietary_surveys/ndnsdocuments/ndnspreviousreports</a> | Reports and appendices can be found at:<br><a href="http://www.iuna.net/?p=106">http://www.iuna.net/?p=106</a>       |                                                                                                                                      |

---
