# Supplementary material for: Modeling tool for calculating dietary iron bioavailability in iron-sufficient adults
Source: PubMed Central journal article supplement (PMC5533300; doi:10.3945/ajcn.116.147389), 2017-04-05
Supplement: 116.147389_ajcn147389SupplementaryData3.pdf [file 116.147389_ajcn147389SupplementaryData3.pdf]

| CODE | GENDER | AGE | WEIGHT | BMI   | HAEMOGLOBIN | SERUM FERRITIN | IRON_MEAN | CALCIUM | SAMPLE       |
|------|--------|-----|--------|-------|-------------|----------------|-----------|---------|--------------|
| 105  | Male   | 54  | 83.7   | 23.09 | 15.5        | 132.12         | 43.15     | 0.56    | 954.16 NANS  |
| 114  | Female | 76  | 73.6   | 28.22 | 14.3        | 134.51         | 5.02      | 0.43    | 737.02 NANS  |
| 121  | Male   | 58  | 92.1   | 30.7  | 14.2        | 242.38         | 13.67     | 1.13    | 1186.76 NANS |
| 122  | Male   | 33  | 72.7   | 23.47 | 13.9        | 165.85         | 18.24     | 3.07    | 803.51 NANS  |
| 123  | Female | 47  | 66     | 22.84 | 13.4        | 78.93          | 14.76     | 7.1     | 860.69 NANS  |
| 134  | Female | 72  | 54     | 22.59 | 12.1        | 49.21          | 4.92      | 0.71    | 1852.17 NANS |
| 135  | Female | 73  | 87.6   | 30.38 | 14.2        | 342.58         | 11.73     | 1.96    | 797.17 NANS  |
| 139  | Male   | 80  | 70.9   | 29.43 | 15.1        | 242.58         | 11.76     | 3.61    | 840.54 NANS  |
| 143  | Female | 49  | 75.1   | 23.94 | 13.5        | 119.18         | 22.96     | 3.76    | 1448.96 NANS |
| 147  | Male   | 62  | 99.6   | 30.1  | 15.1        | 117.67         | 19.17     | 2.86    | 1390.24 NANS |
| 149  | Male   | 49  | 72.9   | 29.54 | 12.1        | 14.8           | 12.48     | 0.74    | 1018.97 NANS |
| 153  | Male   | 35  | 72.6   | 25.51 | 14.7        | 195.21         | 13        | 0.71    | 828.53 NANS  |
| 156  | Male   | 41  | 103.2  | 32.64 | 14.2        | 108.3          | 14.96     | 0.18    | 2107.32 NANS |
| 170  | Male   | 51  | 89.15  | 32.51 | 14.6        | 170.62         | 15.31     | 4.46    | 831.34 NANS  |
| 171  | Female | 76  | 55     | 22.06 | 11.5        | 135.3          | 3.22      | 0.32    | 226.23 NANS  |
| 174  | Male   | 52  | 98.25  | 31.9  | 16.6        | 674.66         | 15.02     | 2.41    | 680.6 NANS   |
| 175  | Female | 40  | 56.1   | 23.08 | 13.5        | 20.14          | 8.89      | 0.84    | 599.16 NANS  |
| 177  | Male   | 77  | 59.35  | 21.67 | 14.3        | 289.87         | 10.57     | 2.12    | 761.39 NANS  |
| 178  | Male   | 45  | 107.05 | 33.41 | 15          | 485.96         | 26.74     | 3.42    | 934.72 NANS  |
| 179  | Female | 49  | 82     | 29.16 | 12.5        | 27.47          | 12.62     | 1.18    | 607.99 NANS  |
| 181  | Male   | 55  | 99.25  | 26.53 | 14.2        | 200.13         | 17.35     | 1.44    | 1274.09 NANS |
| 201  | Female | 41  | 62     | 22.77 | 12.4        | 18.7           | 16.09     | 3.31    | 807.51 NANS  |
| 205  | Female | 49  | 61.7   | 26.22 | 9.9         | 12.49          | 6.73      | 1.2     | 1134.65 NANS |
| 206  | Female | 52  | 73.15  | 27.07 | 13.6        | 83.55          | 12.36     | 0.65    | 898.65 NANS  |
| 210  | Female | 35  | 69.8   | 28.1  | 13.8        | 25.54          | 10.03     | 0.48    | 509.8 NANS   |
| 211  | Female | 60  | 54.2   | 21.28 | 12.5        | 134.94         | 13.56     | 2.64    | 1860.55 NANS |
| 224  | Male   | 43  | 97.2   | 31.27 | 15.6        | 143.9          | 10.77     | 3.95    | 725.03 NANS  |
| 226  | Female | 52  | 63.1   | 22.41 |             | 80.89          | 16.1      | 0.37    | 1355.79 NANS |
| 240  | Female | 48  | 58.1   | 22.53 | 13          | 43.19          | 7.19      | 0.84    | 713.58 NANS  |
| 241  | Male   | 79  | 66.85  | 25.22 | 13.9        | 165.97         | 8.82      | 2.53    | 532.64 NANS  |
| 245  | Male   | 58  | 93.85  | 28.02 | 14.5        | 208.24         | 15.28     | 3.34    | 788.14 NANS  |
| 246  | Male   | 44  | 94.4   | 27.76 | 12.2        | 7.23           | 9.01      | 2.57    | 1052.49 NANS |
| 267  | Male   | 66  | 70.65  | 25.67 | 15.5        | 66.55          | 9.5       | 0.46    | 902.57 NANS  |
| 270  | Male   | 65  | 80.6   | 26.84 | 16          | 182.41         | 11.07     | 2.62    | 1167.26 NANS |
| 271  | Male   | 62  | 95     | 30.12 | 16.5        | 101.17         | 8.4       | 1.72    | 776.32 NANS  |
| 282  | Male   | 73  | 91.15  | 29.13 | 14.1        | 61.14          | 15.69     | 6.22    | 980.97 NANS  |
| 283  | Male   | 65  | 78.5   | 29.04 | 16.1        | 96.21          | 10.74     | 1.38    | 648.21 NANS  |
| 285  | Male   | 77  | 68.8   | 22.11 | 14.5        | 175.52         | 10.91     | 2.52    | 978.64 NANS  |
| 287  | Female | 39  | 69.8   | 25.33 | 12.3        | 13.55          | 7.16      | 1.1     | 909.92 NANS  |
| 302  | Female | 43  | 67.35  | 22.69 | 11.2        | 57.65          | 11.07     | 0.17    | 1689.49 NANS |
| 303  | Female | 41  | 73.5   | 30.05 | 12.2        | 9.4            | 14.24     | 0       | 670.75 NANS  |
| 305  | Male   | 59  | 90.6   | 28.98 | 15.7        | 255.13         | 8.63      | 2.56    | 744.65 NANS  |
| 314  | Female | 61  | 76.5   | 28.07 | 13.9        | 143.98         | 8.53      | 2.81    | 712.43 NANS  |
| 317  | Male   | 48  | 79.8   | 27.64 | 13.6        | 121.05         | 10.12     | 2.8     | 695.75 NANS  |
| 334  | Female | 31  | 47.1   | 18.54 | 14          | 43.07          | 9.25      | 1.72    | 974.99 NANS  |
| 342  | Male   | 56  | 87.7   | 27.22 | 12.7        | 232.78         | 7.54      | 1.88    | 519.98 NANS  |
| 343  | Female | 31  | 68.4   | 24.58 | 11.8        | 19.14          | 10.41     | 2.2     | 518.66 NANS  |
| 344  | Female | 42  | 63.7   | 24.73 | 12.7        | 85.8           | 4.76      | 1.2     | 549.51 NANS  |
| 368  | Male   | 45  | 72.2   | 27.99 | 13.3        | 135.44         | 5.29      | 0.47    | 638.87 NANS  |
| 371  | Female | 50  | 85.75  | 31.19 | 11.6        | 130.53         | 8.43      | 2.21    | 610.99 NANS  |
| 373  | Female | 45  | 88.1   | 33.69 | 13.8        | 330.86         | 10.77     | 6.71    | 929.96 NANS  |
| 374  | Male   | 61  | 86     | 29.69 | 14.7        | 56.32          | 12.95     | 1.54    | 934.2 NANS   |
| 380  | Male   | 26  | 84.3   | 26.61 | 14.8        | 15.18          | 10.87     | 4.48    | 716.26 NANS  |
| 381  | Male   | 48  | 84.3   | 26.61 | 13.8        | 57.21          | 15.09     | 4.89    | 2180.92 NANS |
| 384  | Female | 69  | 70.45  | 27.49 | 14          | 218.76         | 6.87      | 0.33    | 631.49 NANS  |
| 385  | Male   | 54  | 73.2   | 25.66 | 14.3        | 27.88          | 12.73     | 2.03    | 885.24 NANS  |
| 386  | Male   | 49  | 105.45 | 34.08 | 14.4        | 58.48          | 8.96      | 3.4     | 770.9 NANS   |

|            |    |        |       |      |        |       |      |         |      |
|------------|----|--------|-------|------|--------|-------|------|---------|------|
| 401 Female | 45 | 62.3   | 24.96 | 13   | 164.21 | 10.54 | 0.88 | 764.72  | NANS |
| 402 Male   | 43 | 67.6   | 25.2  | 14.7 | 81.2   | 16.26 | 1.69 | 707.66  | NANS |
| 404 Female | 60 | 66.6   | 26.21 | 13.5 | 79.37  | 9.87  | 1.18 | 488.31  | NANS |
| 405 Male   | 41 | 83.3   | 26.44 | 14.3 | 41.91  | 11.5  | 5.35 | 955.82  | NANS |
| 406 Male   | 48 | 89.35  | 31.73 | 16   | 15.92  | 19.88 | 7.89 | 1147.1  | NANS |
| 407 Female | 70 | 68.45  | 25.89 | 12.7 | 96.54  | 8.43  | 1.43 | 1253.01 | NANS |
| 409 Male   | 49 | 82.75  | 25.97 | 15.3 | 199.69 | 16.1  | 1.07 | 1129.41 | NANS |
| 411 Female | 62 | 84.5   | 34.9  | 14.1 | 71.71  | 9.79  | 2.56 | 617.93  | NANS |
| 413 Female | 45 | 61.6   | 21.62 | 12.8 | 84.46  | 9.02  | 1.71 | 556.97  | NANS |
| 414 Male   | 50 | 86.1   | 26.14 | 14.1 | 87.53  | 14.49 | 1.31 | 1305.36 | NANS |
| 415 Male   | 52 | 84.7   | 26.29 | 14.8 | 96.51  | 18.88 | 0.46 | 1258.98 | NANS |
| 416 Male   | 47 | 92.75  | 29.47 | 14.8 | 92.02  | 18.02 | 2.51 | 940.19  | NANS |
| 418 Female | 32 | 66.9   | 25.62 | 12.5 | 13.55  | 7.26  | 2.26 | 750.37  | NANS |
| 435 Male   | 47 | 99.05  | 28.94 | 14.2 | 131.87 | 14.41 | 5.95 | 699.14  | NANS |
| 439 Female | 44 | 61.1   | 21.02 | 14.1 | 58.2   | 5.47  | 0.86 | 670.05  | NANS |
| 441 Female | 66 | 56     | 21.71 | 13.8 | 53.12  | 10.91 | 1.42 | 2609.64 | NANS |
| 442 Male   | 37 | 72.6   | 24.15 | 14.9 | 91.75  | 11.08 | 1.49 | 924.24  | NANS |
| 444 Female | 46 | 78.1   | 32.13 | 12.7 | 100.19 | 16    | 0.47 | 862.31  | NANS |
| 445 Male   | 27 | 84.7   | 28.63 | 15.7 | 153.11 | 9.61  | 0.9  | 1349.82 | NANS |
| 454 Male   | 45 | 98     | 31.18 | 15.4 | 137.4  | 8.59  | 2.21 | 837.57  | NANS |
| 467 Female | 71 | 81.25  | 33.26 | 13.4 | 226.99 | 12.42 | 1.15 | 792.62  | NANS |
| 469 Male   | 33 | 88.35  | 26.82 | 14.6 | 141.44 | 22.14 | 1.68 | 732.1   | NANS |
| 471 Male   | 63 | 74.85  | 26.65 | 15.1 | 30.55  | 13.64 | 0.57 | 1289.52 | NANS |
| 473 Female | 35 | 58.55  | 22.37 | 12   | 76.2   | 13.89 | 2.44 | 895.73  | NANS |
| 474 Female | 32 | 52.55  | 20.45 | 12.8 | 147.98 | 20.75 | 2.14 | 1036.28 | NANS |
| 478 Male   | 47 | 84.75  | 25.45 | 14.3 | 44.53  | 26.09 | 0.94 | 2246.6  | NANS |
| 480 Male   | 63 | 75.5   | 22.37 | 15   | 176.79 | 10.35 | 1.88 | 1174.13 | NANS |
| 484 Female | 47 | 68.4   | 23.72 | 13.7 | 12.29  | 29.23 | 0.41 | 1192.41 | NANS |
| 486 Male   | 26 | 71.6   | 22.55 | 14.5 | 130.27 | 14.49 | 5.46 | 2204.24 | NANS |
| 487 Female | 38 | 58.95  | 23.38 | 12.8 | 26.87  | 8.95  | 2.27 | 458.92  | NANS |
| 488 Female | 24 | 62.95  | 23.26 | 13.9 | 115.59 | 6.33  | 0.44 | 590.6   | NANS |
| 489 Male   | 41 | 79     | 26.83 | 14.3 | 71.39  | 16.8  | 0    | 1570.17 | NANS |
| 490 Male   | 40 | 81.2   | 28.8  | 14.8 | 88.49  | 12.59 | 3.54 | 718.44  | NANS |
| 502 Male   | 48 | 59.3   | 24    | 14.5 | 89.58  | 9.79  | 1.37 | 723.99  | NANS |
| 503 Male   | 49 | 93.6   | 32.16 | 15.2 | 295.89 | 14.22 | 0.74 | 1136.13 | NANS |
| 504 Female | 52 | 70.2   | 28.66 | 14.2 | 182.92 | 12.88 | 2.16 | 756.29  | NANS |
| 505 Female | 42 | 71.9   | 27.06 | 13.7 | 24.04  | 9.95  | 1.45 | 484.24  | NANS |
| 506 Female | 47 | 63.1   | 26.92 | 10.4 | 9.42   | 10.21 | 1.77 | 752.29  | NANS |
| 508 Female | 51 | 74.5   | 31.41 | 14   | 116.71 | 7.77  | 0.89 | 539.71  | NANS |
| 509 Female | 62 | 84.6   | 33.13 | 14   | 262.89 | 8.52  | 1.15 | 395.35  | NANS |
| 510 Female | 54 | 63.85  | 23.74 | 14.7 | 187.04 | 11.51 | 2.23 | 902.97  | NANS |
| 513 Female | 32 | 54.3   | 20.41 | 13.1 | 30.13  | 9.34  | 2.46 | 824.24  | NANS |
| 515 Female | 54 | 87.35  | 29.19 | 13.7 | 57.72  | 9.92  | 1.61 | 586.43  | NANS |
| 516 Male   | 56 | 84.9   | 28.2  | 14.3 | 94.61  | 14.2  | 1.86 | 826.54  | NANS |
| 519 Female | 48 | 74.1   | 24.2  | 12.1 | 41.32  | 8     | 0    | 771.54  | NANS |
| 521 Female | 33 | 80.1   | 31.49 | 12.4 | 44.31  | 20.38 | 0.57 | 1789.47 | NANS |
| 525 Female | 47 | 85.55  | 30.6  | 10.6 | 11.17  | 5.92  | 0.97 | 588.11  | NANS |
| 526 Female | 51 | 76     | 26.74 | 12.6 | 39.3   | 6.32  | 0.78 | 903.82  | NANS |
| 534 Female | 51 | 94     | 33.87 | 13   | 58.16  | 11.44 | 3.14 | 862.31  | NANS |
| 535 Male   | 45 | 72.4   | 22.8  | 15.4 | 126.61 | 18.43 | 5.35 | 1681.63 | NANS |
| 536 Male   | 49 | 109    | 35.71 | 15.5 | 679.25 | 25.07 | 5.86 | 1575.21 | NANS |
| 539 Male   | 49 | 98.4   | 32.84 | 16.1 | 325.72 | 9.72  | 4.98 | 971.72  | NANS |
| 540 Female | 26 | 68.6   | 24.69 | 12.4 | 8.67   | 22.77 | 0.27 | 912.52  | NANS |
| 542 Male   | 60 | 105.35 | 31.08 | 15   | 182.56 | 15.61 | 2.26 | 1560.84 | NANS |
| 545 Female | 20 | 64.1   | 25.91 | 12.8 | 38.47  | 15.74 | 3.23 | 905.62  | NANS |
| 547 Female | 55 | 65.5   | 27.83 | 13.4 | 208.69 | 9.1   | 0.98 | 752.21  | NANS |
| 548 Female | 29 | 51.15  | 20.78 | 12.9 | 114.73 | 10.53 | 3.04 | 1882.01 | NANS |
| 552 Female | 55 | 60.75  | 29.01 | 13.7 | 58.52  | 6.43  | 0.83 | 741.11  | NANS |

|            |    |        |       |      |        |       |      |         |      |
|------------|----|--------|-------|------|--------|-------|------|---------|------|
| 554 Female | 45 | 65.05  | 27.43 | 13.1 | 121.48 | 5.74  | 0.62 | 470.49  | NANS |
| 555 Male   | 51 | 85.2   | 29.76 | 16.6 | 107.64 | 10.68 | 6.03 | 1604.05 | NANS |
| 557 Female | 23 | 67.3   | 22.91 | 13.3 | 21.04  | 7.86  | 1.76 | 619.66  | NANS |
| 558 Female | 44 | 57.3   | 22.67 | 12.3 | 12.57  | 13.21 | 1.61 | 1214.46 | NANS |
| 568 Male   | 21 | 101.3  | 31.79 | 14.5 | 113.28 | 12.89 | 1.73 | 1104.21 | NANS |
| 570 Female | 66 | 60     | 23.58 | 13.3 | 122.35 | 13.58 | 0.44 | 2306.24 | NANS |
| 573 Female | 48 | 71.3   | 23.71 | 13.8 | 68.05  | 15    | 4.78 | 897.8   | NANS |
| 574 Male   | 56 | 91     | 27.96 | 15.5 | 142.74 | 17.46 | 3.76 | 667.99  | NANS |
| 577 Male   | 56 | 91.95  | 28.89 | 15   | 94.8   | 10.9  | 1.75 | 908.54  | NANS |
| 579 Male   | 64 | 91.1   | 29.48 | 16.5 | 284.36 | 11.71 | 1.22 | 1116.75 | NANS |
| 581 Female | 46 | 67.6   | 26.74 | 14.1 | 89.51  | 6.72  | 0.79 | 717.43  | NANS |
| 582 Male   | 44 | 90     | 27.81 | 15   | 290.6  | 15.51 | 0.86 | 1366.74 | NANS |
| 585 Female | 57 | 66.9   | 24.07 | 14.5 | 293.54 | 12.79 | 2.73 | 544.94  | NANS |
| 586 Male   | 55 | 101.8  | 29.91 | 15.1 | 208.49 | 20.52 | 2.84 | 1148.33 | NANS |
| 588 Male   | 65 | 79.5   | 27.09 | 14.8 | 124.59 | 10.79 | 1.15 | 1040.49 | NANS |
| 589 Female | 49 | 50.3   | 20.86 | 9.3  | 10.76  | 14.77 | 2.02 | 1404.55 | NANS |
| 590 Female | 52 | 76.8   | 28.52 | 13.3 | 191.34 | 9.3   | 0.38 | 922.5   | NANS |
| 591 Male   | 28 | 67.95  | 21.81 | 14.1 | 270.05 | 19.91 | 2.2  | 1440.03 | NANS |
| 593 Male   | 57 | 75.2   | 28.44 | 14.6 | 254.29 | 19.7  | 0.36 | 1200.34 | NANS |
| 594 Female | 29 | 57.4   | 23.23 | 13.9 | 32.3   | 13.38 | 1.38 | 1231.11 | NANS |
| 595 Male   | 51 | 104    | 32.1  | 13.3 | 111.36 | 12.98 | 3.28 | 576.02  | NANS |
| 602 Female | 64 | 96.45  | 36.08 | 13.7 | 187.37 | 12.76 | 1.94 | 543.79  | NANS |
| 605 Female | 39 | 83.3   | 29.83 | 12.9 | 15.81  | 11.11 | 2.97 | 865.76  | NANS |
| 606 Male   | 54 | 107.7  | 33.24 | 14.9 | 636.47 | 10.27 | 1.83 | 469.95  | NANS |
| 607 Female | 46 | 53.15  | 21.24 | 12.3 | 36.34  | 3.41  | 1.02 | 298.7   | NANS |
| 608 Female | 67 | 76.1   | 30.48 | 12.9 | 36.79  | 9.61  | 0.6  | 1254.73 | NANS |
| 611 Female | 56 | 66.55  | 26.62 | 15.3 | 36.92  | 8.01  | 2.17 | 809.87  | NANS |
| 612 Female | 49 | 65     | 22.84 | 13.8 | 89.01  | 13.65 | 3.01 | 983.42  | NANS |
| 613 Male   | 44 | 90.3   | 30.35 | 15.9 | 293.84 | 17.51 | 3.59 | 914.59  | NANS |
| 617 Male   | 60 | 99.9   | 35.14 | 15.5 | 139.23 | 9.72  | 1.69 | 827.09  | NANS |
| 622 Female | 40 | 90.6   | 33.64 | 15.2 | 115.75 | 5.85  | 1    | 361.85  | NANS |
| 624 Female | 58 | 86     | 30.08 | 12.8 | 86.45  | 15.24 | 4.64 | 1253.48 | NANS |
| 625 Female | 43 | 65.6   | 23.21 | 11.1 | 14.65  | 10.36 | 0.51 | 946.52  | NANS |
| 626 Male   | 51 | 99.4   | 32.09 | 15.4 | 199.74 | 10.58 | 2.61 | 435.99  | NANS |
| 627 Female | 30 | 59.4   | 21.32 | 14.7 | 33.25  | 7.81  | 2.45 | 579.48  | NANS |
| 628 Female | 39 | 79.4   | 30.67 | 14.8 | 86.62  | 11.05 | 0.92 | 843.97  | NANS |
| 634 Female | 46 | 80.3   | 31.17 | 14.6 | 381.28 | 4.24  | 1.37 | 294.44  | NANS |
| 637 Female | 67 | 60.9   | 25.68 | 14.4 | 77.93  | 11.23 | 5.22 | 562.28  | NANS |
| 638 Female | 44 | 64.2   | 24.43 | 13.4 | 14.54  | 10.58 | 0.76 | 768.53  | NANS |
| 639 Male   | 44 | 90.1   | 29.02 | 15.8 | 234.18 | 23.82 | 4.3  | 1547.63 | NANS |
| 640 Female | 61 | 58.9   | 21.2  | 12   | 45.56  | 10.89 | 0.12 | 1033.72 | NANS |
| 642 Female | 42 | 67.9   | 23.61 | 13.6 | 39.14  | 19.11 | 2.29 | 714.24  | NANS |
| 646 Female | 48 | 95.7   | 38.09 | 14.2 | 40.65  | 10.06 | 0.77 | 652.15  | NANS |
| 648 Male   | 36 | 113.3  | 33.5  | 15.3 | 167.6  | 8.89  | 0.83 | 791.51  | NANS |
| 652 Female | 40 | 77.35  | 25.73 | 12.1 | 94.6   | 18.53 | 1.42 | 722.61  | NANS |
| 653 Male   | 51 | 86.45  | 28.07 | 14.7 | 202.57 | 18.27 | 1.3  | 1868.49 | NANS |
| 654 Male   | 58 | 115.4  | 33.36 | 15.8 | 85.18  | 13.73 | 2.91 | 1069.7  | NANS |
| 659 Male   | 29 | 68.6   | 22.5  | 14.2 | 137.53 | 10.94 | 2.76 | 642.79  | NANS |
| 667 Female | 51 | 66.7   | 25.92 | 12.6 | 35.72  | 12.97 | 2.21 | 1707.27 | NANS |
| 669 Male   | 24 | 107.85 | 31.68 | 16   | 237.45 | 17.32 | 7.96 | 739.4   | NANS |
| 671 Male   | 61 | 101.3  | 34.85 | 15.7 | 172.77 | 12.66 | 1.93 | 1292.58 | NANS |
| 676 Male   | 41 | 93.1   | 25.25 | 15.9 | 327.49 | 9.63  | 2.49 | 540.23  | NANS |
| 677 Female | 41 | 83.6   | 30.71 | 14.7 | 138.88 | 6.12  | 1.08 | 978.97  | NANS |
| 678 Female | 58 | 67.8   | 22.55 | 13.9 | 122.31 | 9.36  | 1.57 | 1357.88 | NANS |
| 681 Male   | 33 | 96.1   | 27.48 | 16.3 | 88.41  | 7.81  | 3.57 | 354.31  | NANS |
| 683 Female | 36 |        |       | 14   | 41.21  | 11.09 | 3.23 | 838.33  | NANS |
| 684 Female | 43 |        |       | 14.3 | 33.32  | 16.19 | 3.22 | 1029.34 | NANS |
| 685 Male   | 48 | 98.95  | 33.84 | 15.2 | 341.05 | 11.88 | 3.27 | 435.65  | NANS |

|            |    |       |       |      |        |       |      |         |      |
|------------|----|-------|-------|------|--------|-------|------|---------|------|
| 689 Female | 20 | 76.9  | 24.22 | 15.3 | 20.45  | 21.34 | 2.82 | 601.79  | NANS |
| 701 Female | 38 | 71.5  | 25.92 | 13.5 | 28.77  | 8.76  | 2.54 | 734.89  | NANS |
| 702 Female | 37 | 78.5  | 29.65 | 14.2 | 18.71  | 14.98 | 2.75 | 881.21  | NANS |
| 703 Female | 38 | 80.5  | 31.84 | 15.1 | 47.58  | 7.97  | 3.87 | 1010.86 | NANS |
| 706 Male   | 35 | 84.35 | 29.22 | 15.3 | 182.92 | 18.77 | 2.32 | 1566.46 | NANS |
| 707 Female | 35 | 71.9  | 25.6  | 13.3 | 112.48 | 11.98 | 1.32 | 714.5   | NANS |
| 708 Female | 44 | 65.2  | 25.44 | 12.3 | 26.53  | 13.46 | 9.06 | 699.06  | NANS |
| 711 Female | 46 | 68.7  | 28.6  | 13.1 | 43.88  | 6.59  | 0.05 | 1728.19 | NANS |
| 712 Male   | 37 | 103.3 | 33.08 | 16.9 | 148.65 | 17.32 | 6.37 | 1201.39 | NANS |
| 716 Female | 40 | 51.3  | 18.82 | 14   | 75.4   | 9.83  | 4.5  | 619.09  | NANS |
| 717 Female | 43 | 75.1  | 26.58 | 12.8 | 26.21  | 11.67 | 0.98 | 940.09  | NANS |
| 719 Male   | 25 | 87    | 28.77 | 16.3 | 197.9  | 8.05  | 0.3  | 641.43  | NANS |
| 723 Female | 44 | 82.2  | 27.12 | 13.5 | 83.65  | 19.88 | 3.38 | 1157.28 | NANS |
| 734 Male   | 32 | 85.85 | 26.06 | 14.9 | 112.2  | 13.25 | 1.82 | 1172.82 | NANS |
| 736 Male   | 38 | 82    | 26.59 | 15.5 | 164.97 | 15.09 | 2.65 | 946     | NANS |
| 737 Male   | 43 | 84.7  | 25.1  | 14.4 | 172.11 | 11.02 | 2.32 | 446.83  | NANS |
| 738 Female | 30 | 74.7  | 27.91 | 14.1 | 11.78  | 9.61  | 3.08 | 778.86  | NANS |
| 740 Female | 43 | 65.6  | 25    | 13.8 | 79.81  | 8.04  | 1.26 | 434.32  | NANS |
| 741 Male   | 47 | 85.2  | 28.34 | 15.2 | 146.82 | 9.04  | 1.21 | 1830.01 | NANS |
| 742 Female | 39 | 80.7  | 29.01 | 13   | 7.29   | 5.49  | 0.73 | 522.61  | NANS |
| 743 Male   | 50 | 117.1 | 37.21 | 14.7 | 99.83  | 18.37 | 4.58 | 912.52  | NANS |
| 745 Female | 47 | 69.7  | 24.29 | 13.3 | 114.02 | 7.12  | 0.99 | 724.58  | NANS |
| 746 Female | 35 |       |       | 14.6 | 90.1   | 6.88  | 0.86 | 1068.96 | NANS |
| 748 Female | 35 | 90.3  | 31.1  | 13.1 | 61.95  | 18.23 | 2.98 | 807.42  | NANS |
| 750 Female | 41 | 65    | 25.45 | 13.5 | 111.87 | 7.94  | 0.48 | 457.86  | NANS |
| 751 Male   | 39 | 92    | 29.5  | 15   | 49.4   | 11.08 | 0.79 | 659.77  | NANS |
| 753 Male   | 29 | 61.3  | 21.64 | 15.3 | 31.07  | 7.64  | 1.04 | 973.22  | NANS |
| 754 Female | 24 | 59.5  | 23.1  | 14.2 | 56.78  | 10.43 | 1.41 | 491     | NANS |
| 756 Female | 51 | 81    | 33.5  | 17.1 | 158.73 | 10.86 | 3.32 | 583.33  | NANS |
| 767 Male   | 45 | 75.3  | 23.01 | 14.7 | 326.43 | 20.99 | 3.16 | 1912.81 | NANS |
| 771 Female | 43 | 111.6 | 37.25 |      | 271.47 | 17.09 | 2.36 | 756.44  | NANS |
| 773 Male   | 44 | 89.55 | 29.82 | 15.6 | 108.53 | 14.95 | 2.81 | 1012.52 | NANS |
| 777 Female | 36 |       |       | 14.3 | 71.57  | 8.59  | 1.44 | 488.95  | NANS |
| 778 Female | 31 | 68    | 24.86 | 13.8 | 38.14  | 10.21 | 1.44 | 893.24  | NANS |
| 779 Female | 42 | 90.05 | 36.16 | 13   | 13.97  | 6.67  | 1.29 | 924.54  | NANS |
| 780 Male   | 77 | 82.7  | 28.96 | 14.9 | 134.14 | 4.57  | 0.71 | 658.48  | NANS |
| 782 Female | 23 | 51.7  | 20.07 | 12.5 | 38.77  | 9.26  | 1.53 | 857.3   | NANS |
| 803 Male   | 23 | 68.1  | 22.24 | 16.4 | 158.52 | 52.12 | 2.35 | 1251.69 | NANS |
| 804 Male   | 26 | 71.5  | 23.11 | 13.8 | 155.32 | 8.62  | 2.83 | 1021.38 | NANS |
| 807 Male   | 27 | 70.9  | 23.42 | 15.6 | 106.9  | 17.22 | 6.06 | 1393.82 | NANS |
| 810 Male   | 24 | 89.3  | 25.78 | 14.6 | 181.65 | 25.75 | 3.13 | 1111.78 | NANS |
| 811 Female | 25 | 80.95 | 30.92 | 14.8 | 96.13  | 6.39  | 1.07 | 430.12  | NANS |
| 812 Male   | 26 | 88.7  | 28.34 | 15.5 | 221.19 | 8.6   | 2.49 | 605.92  | NANS |
| 815 Male   | 26 | 76.3  | 24.41 | 14.3 | 132.94 | 11.88 | 1.74 | 869.06  | NANS |
| 816 Female | 29 | 83    | 26.58 | 15   | 57.56  | 12.79 | 1.03 | 1874.89 | NANS |
| 818 Male   | 26 | 95.15 | 30.79 | 13.9 | 192.09 | 11.09 | 2.01 | 1052.99 | NANS |
| 822 Female | 27 | 63.2  | 22.47 | 13.8 | 68.61  | 11.29 | 1.28 | 541.69  | NANS |
| 825 Male   | 37 | 102.5 | 30.51 | 14.4 | 123.88 | 14.21 | 2.94 | 1477.23 | NANS |
| 826 Male   | 34 | 91.4  | 32.38 | 15.4 | 156.61 | 13.98 | 2.22 | 1022.81 | NANS |
| 827 Female | 25 | 75.5  | 21.25 | 14.6 | 42.19  | 5.25  | 1.46 | 381.04  | NANS |
| 828 Female | 34 | 69.5  | 24.77 | 11.7 | 24.79  | 8.25  | 0.29 | 805.33  | NANS |
| 829 Female | 32 | 67.5  | 23.25 | 12.8 | 49.39  | 12.06 | 3.07 | 1314.25 | NANS |
| 832 Female | 35 | 69.7  | 25.63 | 12.9 | 30.32  | 16.18 | 0    | 1261.35 | NANS |
| 834 Male   | 23 | 91    | 26.02 | 14.9 | 79.13  | 17.17 | 0.86 | 980.17  | NANS |
| 837 Female | 37 | 71.5  | 27.58 | 12.9 | 24.13  | 11.07 | 0.84 | 566.83  | NANS |
| 838 Male   | 36 | 79.8  | 28.24 | 15.7 | 187.87 | 15.97 | 3.09 | 997.86  | NANS |
| 840 Male   | 29 | 123.5 | 37.12 | 15   | 334.04 | 7.85  | 2.68 | 467.62  | NANS |
| 841 Female | 27 | 73.6  | 24.88 | 13.8 | 70.09  | 7.95  | 1.06 | 1117.08 | NANS |

|             |    |        |       |      |        |       |      |         |      |
|-------------|----|--------|-------|------|--------|-------|------|---------|------|
| 842 Male    | 32 | 95.1   | 30.02 | 15   | 190.85 | 5.83  | 2.47 | 698.48  | NANS |
| 844 Male    | 32 | 95.8   | 27.4  | 15.7 | 95.31  | 18.98 | 3.46 | 1562.02 | NANS |
| 847 Male    | 36 | 85.2   | 28.97 | 16.9 | 217.96 | 13.08 | 3.42 | 758.3   | NANS |
| 849 Male    | 37 | 75.7   | 24.63 | 14.7 | 154.46 | 7.24  | 1.22 | 579.57  | NANS |
| 854 Male    | 31 | 104.7  | 33.99 | 16.2 | 212.38 | 16.24 | 4.69 | 1092.54 | NANS |
| 855 Female  | 28 | 59.8   | 25.55 | 11.6 | 35.36  | 9.81  | 2.61 | 699.81  | NANS |
| 857 Female  | 33 | 106.8  | 39.71 | 13.5 | 36.13  | 4.93  | 1.36 | 262.37  | NANS |
| 859 Female  | 32 | 68.8   | 27.39 | 12.2 | 22.98  | 9.58  | 2.83 | 639.56  | NANS |
| 860 Female  | 21 | 55.6   | 22.13 | 13.6 | 55.89  | 4.18  | 0.29 | 490.15  | NANS |
| 873 Male    | 26 | 71.3   | 25.05 | 14   | 175.72 | 7.39  | 1.28 | 1080.01 | NANS |
| 874 Female  | 27 | 64.6   | 21.71 | 13   | 80.57  | 15.72 | 0    | 547     | NANS |
| 875 Male    | 26 | 73.4   | 21.68 | 15.4 | 137.81 | 17.61 | 4.37 | 1141.79 | NANS |
| 882 Female  | 34 | 73.2   | 26.47 | 13.5 | 62.04  | 9.11  | 2.13 | 566.57  | NANS |
| 894 Female  | 22 | 45.75  | 17.35 | 13.5 | 80.65  | 9.8   | 0.67 | 652.58  | NANS |
| 903 Male    | 35 | 97.65  | 30.48 |      | 181.59 | 10.27 | 3.71 | 649.79  | NANS |
| 904 Male    | 31 | 86.8   | 24.45 | 14.7 | 127.52 | 3.82  | 1.62 | 605.12  | NANS |
| 907 Male    | 64 |        |       | 11.8 | 146.75 | 6.55  | 0.25 | 1134.37 | NANS |
| 909 Male    | 57 | 75.3   | 25.31 | 14.1 | 222.31 | 8.82  | 2.8  | 680.5   | NANS |
| 910 Male    | 31 | 65.45  | 22.25 | 13.9 | 109.64 | 14.71 | 3.29 | 956.94  | NANS |
| 913 Male    | 28 |        |       | 14.1 | 194.62 | 11.56 | 3.43 | 1236.2  | NANS |
| 921 Female  | 52 | 63.5   | 21.59 | 14.1 | 231.95 | 10.42 | 3.2  | 450.22  | NANS |
| 922 Male    | 47 | 87.6   | 27.8  | 13.9 | 16.96  | 15.71 | 4.06 | 898.58  | NANS |
| 926 Female  | 35 | 78.6   | 29.05 | 14.3 | 36.85  | 7.56  | 2.57 | 725.22  | NANS |
| 935 Female  | 55 | 61.3   | 28.96 | 12.7 | 82.05  | 6.59  | 1.36 | 720.79  | NANS |
| 937 Female  | 59 | 86.5   | 35.96 | 13.4 | 46.3   | 4.89  | 0.52 | 877.18  | NANS |
| 939 Male    | 27 | 90.3   | 28.53 | 15.8 | 80.97  | 11.78 | 1.27 | 1053.16 | NANS |
| 945 Female  | 19 | 61.95  | 21.06 | 11   | 19.95  | 12.75 | 0.65 | 1388.35 | NANS |
| 946 Male    | 18 | 80.5   | 27.43 | 14   | 69.49  | 15.4  | 1.61 | 1163.97 | NANS |
| 947 Male    | 37 | 86.2   | 28.87 | 15   | 159.41 | 18.07 | 2.21 | 1482.87 | NANS |
| 950 Male    | 33 | 85.2   | 25.98 | 15.9 | 122.89 | 12.53 | 3.29 | 1055.64 | NANS |
| 951 Female  | 20 | 56.6   | 21.43 | 12.8 | 52.48  | 12.8  | 2.2  | 978.63  | NANS |
| 952 Female  | 31 | 60.8   | 20.79 | 13.4 | 107.44 | 6.51  | 2.65 | 241.06  | NANS |
| 955 Female  | 18 | 62.5   | 22.52 | 12.7 | 39.34  | 15.84 | 6.81 | 1415.21 | NANS |
| 956 Male    | 20 | 83.8   | 25.55 | 14.7 | 68.03  | 19.26 | 9.2  | 1072.72 | NANS |
| 959 Female  | 58 | 70.4   | 23.15 | 14.1 | 66.42  | 16.34 | 2.26 | 1526.57 | NANS |
| 960 Male    | 44 | 80.1   | 28.52 | 16.8 | 187.18 | 9.76  | 2.48 | 604.44  | NANS |
| 969 Male    | 36 | 80.9   | 24.16 | 15.5 | 45.57  | 8.25  | 3.39 | 1209.2  | NANS |
| 970 Male    | 38 | 81     | 27.19 | 16.7 | 109.92 | 6.36  | 2.35 | 851.76  | NANS |
| 971 Male    | 39 | 86.2   | 30.11 | 16.3 | 57.06  | 9.43  | 2.74 | 865.86  | NANS |
| 974 Male    | 36 | 58.4   | 18.02 | 15.4 | 132.37 | 18.49 | 3.13 | 1441.66 | NANS |
| 975 Male    | 20 | 71     | 23.08 | 14.7 | 87.81  | 16.51 | 3.9  | 1560.73 | NANS |
| 978 Male    | 64 | 102.35 | 32.63 | 15.7 | 143.05 | 7.27  | 2.11 | 497.29  | NANS |
| 980 Male    | 29 | 101.6  | 37.91 | 13.9 | 117.44 | 7.68  | 2.31 | 814.73  | NANS |
| 981 Male    | 33 | 116.3  | 29.37 | 15.4 | 196.71 | 12.61 | 4.77 | 969.26  | NANS |
| 1003 Male   | 82 | 76.1   | 26.64 | 15.5 | 375.03 | 9.02  | 1.88 | 684.91  | NANS |
| 1007 Female | 33 | 82.6   | 28.85 | 13.3 | 95.61  | 31.57 | 1.06 | 971.09  | NANS |
| 1008 Male   | 68 | 73.8   | 26.53 | 14.2 | 327.52 | 7.58  | 2.25 | 276.05  | NANS |
| 1010 Female | 72 | 61.4   | 26.75 | 13.7 | 69.83  | 6.3   | 3.26 | 373.67  | NANS |
| 1011 Male   | 33 |        |       | 13.4 | 50.63  | 11.85 | 1.29 | 1206.45 | NANS |
| 1013 Male   | 34 | 79     | 24.27 | 14.8 | 227.37 | 15.79 | 3.54 | 1032.84 | NANS |
| 1016 Female | 75 | 63.4   | 24.46 | 12   | 168.15 | 10.09 | 1.97 | 1612.08 | NANS |
| 1019 Female | 81 | 83.1   | 31.63 | 12.8 | 56.39  | 11.42 | 1.96 | 609.41  | NANS |
| 1020 Female | 68 | 72.9   | 27.34 | 12.2 | 32.76  | 12.06 | 1.67 | 1050.93 | NANS |
| 1021 Female | 81 | 71.1   | 25.9  | 12.8 | 65.6   | 11.5  | 1.44 | 665.84  | NANS |
| 1022 Female | 71 | 88.2   | 34.54 | 11.9 | 71.57  | 12.62 | 1.57 | 664.86  | NANS |
| 1025 Male   | 28 | 75.3   | 24.25 |      | 97.86  | 9.94  | 2.45 | 793.43  | NANS |
| 1026 Male   | 62 | 102.3  | 35.03 | 14.1 | 200    | 11.19 | 1.13 | 548.68  | NANS |
| 1029 Female | 66 | 80.5   | 27.4  | 11.7 | 46.62  | 5.89  | 1.39 | 1156.01 | NANS |

|             |    |        |       |      |        |       |       |         |      |
|-------------|----|--------|-------|------|--------|-------|-------|---------|------|
| 1030 Male   | 47 | 105.15 | 30.33 | 16   | 90.45  | 15.21 | 1.74  | 819.44  | NANS |
| 1031 Male   | 49 | 80.2   | 23.84 | 16.2 | 89.16  | 25.41 | 0.05  | 877.77  | NANS |
| 1033 Male   | 53 |        |       | 14.5 | 119.75 | 5.73  | 1.07  | 483.03  | NANS |
| 1034 Female | 63 | 66.4   | 31.11 | 13.5 | 207.28 | 7.63  | 0.72  | 1457.92 | NANS |
| 1036 Male   | 37 | 83.4   | 26.35 | 15.3 | 46.01  | 21.91 | 5.29  | 1144.47 | NANS |
| 1038 Male   | 36 | 103.1  | 32.91 | 14   | 185.37 | 11.84 | 4.55  | 893.66  | NANS |
| 1042 Female | 30 | 75.1   | 27.06 | 12.1 | 19.48  | 8.89  | 2.78  | 618.32  | NANS |
| 1044 Male   | 31 | 69.15  | 27.25 | 14.7 | 91.75  | 12.21 | 1.14  | 990.69  | NANS |
| 1046 Female | 27 | 79.3   | 30.37 | 12.4 | 32.88  | 9.35  | 1.05  | 278.25  | NANS |
| 1050 Female | 27 | 47.9   | 21.58 | 13.1 | 12.58  | 7.79  | 0.86  | 772.77  | NANS |
| 1051 Male   | 27 | 71.9   | 24.62 | 14.6 | 276.49 | 8.13  | 2.7   | 731.8   | NANS |
| 1052 Male   | 37 | 80.4   | 27.18 | 14.8 | 735.54 | 12.62 | 4.01  | 874.05  | NANS |
| 1053 Female | 75 | 61     | 27.15 | 12.5 | 47.61  | 8.34  | 1.82  | 728.54  | NANS |
| 1054 Male   | 74 | 94.3   | 29.43 | 14.5 | 201.72 | 10.08 | 1.83  | 675.76  | NANS |
| 1055 Female | 77 | 65     | 26.27 | 12.6 | 116.27 | 22.3  | 2.57  | 1665.22 | NANS |
| 1057 Female | 67 | 72.5   | 28.18 | 10.3 | 203.51 | 12.75 | 3.62  | 627.69  | NANS |
| 1059 Male   | 35 | 86     | 27.02 | 15.1 | 76.41  | 15.96 | 12.07 | 609.6   | NANS |
| 1064 Female | 77 | 54.6   | 23.91 | 13.1 | 55.15  | 7.27  | 1.7   | 390.62  | NANS |
| 1065 Male   | 34 | 65     | 20.42 | 14   | 110.28 | 3.34  | 0.08  | 976.72  | NANS |
| 1066 Male   | 48 | 71.8   | 27.06 | 11.4 | 10.74  | 8.74  | 3.72  | 763.84  | NANS |
| 1068 Male   | 69 | 82.3   | 28.34 | 15.4 | 159.51 | 7.6   | 1.08  | 587.05  | NANS |
| 1069 Male   | 31 | 78.2   | 25.39 | 14.7 | 235    | 13.59 | 1.41  | 1674.51 | NANS |
| 1073 Female | 71 | 66.5   | 27.68 | 14.1 | 82.04  | 5.57  | 0.75  | 490.92  | NANS |
| 1074 Male   | 71 |        |       | 13.1 | 242.96 | 9.1   | 1.16  | 926.93  | NANS |
| 1077 Male   | 31 | 100.6  | 27.12 | 13.1 | 146.54 | 35.29 | 1.11  | 1318.04 | NANS |
| 1079 Male   | 32 | 84.6   | 27.31 | 13.5 | 106.31 | 9.08  | 2.34  | 1009.74 | NANS |
| 1081 Male   | 27 | 80.3   | 26.58 | 15.1 | 223.81 | 12.63 | 5.81  | 556.67  | NANS |
| 1084 Male   | 27 | 96.2   | 28.26 | 14.2 | 47.88  | 6.89  | 0.86  | 540.67  | NANS |
| 1085 Male   | 49 | 90.15  | 28.14 | 15.9 | 137.19 | 16.32 | 3.31  | 944.83  | NANS |
| 1086 Female | 61 | 60.55  | 23.51 | 12.4 | 84.59  | 10.99 | 1.4   | 649.15  | NANS |
| 1089 Male   | 48 | 82.3   | 28.82 | 14.3 | 566.07 | 10    | 1.9   | 1158.04 | NANS |
| 1092 Male   | 56 | 103.55 | 31.78 | 14.9 | 152.35 | 12.04 | 4.34  | 686.42  | NANS |
| 1094 Male   | 21 | 100.1  | 31.24 | 15   | 42.88  | 11.38 | 2.06  | 1543.29 | NANS |
| 1101 Female | 75 | 49.7   | 20.69 | 13.3 | 17.23  | 10.91 | 2.93  | 538.77  | NANS |
| 1105 Female | 61 | 73.6   | 29.78 | 12.8 | 303.28 | 11.13 | 1.26  | 915.66  | NANS |
| 1108 Male   | 72 | 82.35  | 29.35 | 16.9 | 88.41  | 9.19  | 3.47  | 733.92  | NANS |
| 1113 Male   | 35 | 79.8   | 28.41 | 14.4 | 80.04  | 10.69 | 3.42  | 811.84  | NANS |
| 1117 Male   | 24 | 67.3   | 21.9  | 15.3 | 164.24 | 13.77 | 1.38  | 873.23  | NANS |
| 1124 Female | 68 | 48.4   | 20.87 | 13.6 | 123.39 | 10.02 | 2     | 2323.7  | NANS |
| 1127 Male   | 27 | 95.3   | 32.36 | 14.6 | 225.49 | 13.97 | 0.31  | 1135.5  | NANS |
| 1128 Male   | 18 | 66.9   | 21.57 | 14.4 | 107.61 | 15.49 | 2.9   | 1538.82 | NANS |
| 1129 Female | 57 | 76.8   | 27.47 | 15.2 | 68.82  | 12.83 | 2.74  | 1123.33 | NANS |
| 1130 Male   | 27 | 92.9   | 28.7  | 13.9 | 89.63  | 15.51 | 1.53  | 1321.16 | NANS |
| 1131 Female | 26 | 60.2   | 22.52 | 12.5 | 40.01  | 9.64  | 0.56  | 614.58  | NANS |
| 1133 Female | 24 | 60.7   | 21.51 | 14.4 | 26.11  | 11.08 | 0.61  | 426.27  | NANS |
| 1136 Female | 69 | 69.3   | 29.26 | 13.1 | 91.96  | 9.16  | 1.8   | 642.86  | NANS |
| 1137 Male   | 75 | 76.85  | 27.92 | 13.7 | 94.4   | 5.85  | 0.22  | 936.46  | NANS |
| 1150 Male   | 21 | 74.05  | 20.88 | 15.1 | 121.84 | 12.3  | 1.45  | 1568.49 | NANS |
| 1151 Male   | 21 | 88.8   | 27.59 | 13.3 | 125.42 | 13.19 | 1.85  | 1546.85 | NANS |
| 1152 Female | 21 | 57.45  | 21.2  | 13   | 76.02  | 6.71  | 1.22  | 811.13  | NANS |
| 1155 Male   | 32 | 86.7   | 28.47 | 15.3 | 48.11  | 4.09  | 2.54  | 399.66  | NANS |
| 1156 Male   | 49 | 85.1   | 28.17 | 14.2 | 169.9  | 8.2   | 2.4   | 734.86  | NANS |
| 1604 Male   | 72 | 79.6   | 26.29 | 14.4 | 59.96  | 10.29 | 1.91  | 647.19  | NANS |
| 1607 Female | 77 | 65.3   | 26.09 | 12.2 | 129.59 | 12.6  | 2.2   | 1056.43 | NANS |
| 1608 Female | 76 | 69.8   | 25.21 | 14.5 | 257.81 | 21.22 | 6.59  | 1183.66 | NANS |
| 1609 Male   | 56 | 92     | 31.28 | 15.8 | 162.76 | 7.04  | 0.89  | 1151.73 | NANS |
| 1610 Female | 67 | 53.9   | 23.77 | 15.6 | 23.3   | 10.76 | 3.79  | 1069.32 | NANS |
| 1612 Female | 81 | 56.4   | 22.65 | 13.7 | 71.31  | 17.4  | 2.23  | 950.84  | NANS |

|             |    |        |       |      |        |       |      |         |      |
|-------------|----|--------|-------|------|--------|-------|------|---------|------|
| 1620 Male   | 73 | 86.3   | 27.39 | 16.7 | 477.28 | 12.54 | 2.4  | 863.44  | NANS |
| 1621 Male   | 50 | 90.8   | 28.5  | 15   | 181.2  | 13.39 | 4.09 | 1352.38 | NANS |
| 1622 Male   | 76 | 66.15  | 22.13 | 13.2 | 195.78 | 8.99  | 1.81 | 1079.99 | NANS |
| 1634 Female | 71 | 59.6   | 22.77 | 13.4 | 74.65  | 16.53 | 0    | 1118.01 | NANS |
| 1636 Female | 64 | 66.55  | 24.59 | 14.6 | 136.93 | 9.02  | 1.05 | 661.59  | NANS |
| 1639 Male   | 71 | 99.7   | 29.23 | 15   | 64.86  | 16.35 | 3.48 | 888.85  | NANS |
| 1641 Male   | 69 | 87.6   | 24.84 | 14.2 | 145    | 14.83 | 2.44 | 994     | NANS |
| 1644 Female | 50 | 60     | 21.46 | 13.4 | 135.68 | 19.56 | 1.13 | 953.63  | NANS |
| 1646 Male   | 51 | 103    | 31.61 | 15.4 | 128.79 | 12.48 | 2.54 | 923.6   | NANS |
| 1648 Female | 60 | 80.2   | 25.34 | 14.4 | 95.24  | 10.23 | 1.26 | 1211.65 | NANS |
| 1649 Female | 27 | 69.8   | 24.7  | 13.7 | 35.36  | 9     | 0.7  | 723.31  | NANS |
| 1650 Female | 63 | 69.5   | 28.05 | 12.9 | 91.2   | 11.51 | 0.03 | 1700.04 | NANS |
| 1651 Male   | 52 | 89.4   | 27.72 | 15.6 | 96.06  | 10.73 | 0.56 | 1456.23 | NANS |
| 1652 Female | 66 | 76.15  | 25.41 | 13.2 | 37.11  | 14.63 | 1.37 | 2736.49 | NANS |
| 1653 Female | 65 | 73.6   | 32.11 | 14.1 | 84.09  | 8.66  | 3.87 | 602.39  | NANS |
| 1655 Male   | 46 | 110.65 | 34.69 | 15.6 | 610.26 | 14.07 | 3.98 | 926.32  | NANS |
| 1658 Female | 75 | 69.1   | 26.62 | 13.9 | 125.29 | 10.9  | 0.93 | 979.76  | NANS |
| 1669 Male   | 27 | 89.55  | 30.3  | 13.3 | 73.85  | 13    | 1.9  | 740.52  | NANS |
| 1673 Female | 41 | 57.6   | 19.72 | 12.6 | 19.15  | 11    | 1.23 | 909.76  | NANS |
| 1677 Male   | 54 | 85.7   | 28.73 | 14.3 | 229.8  | 7.9   | 3.52 | 980.02  | NANS |
| 1681 Female | 47 | 60.45  | 25.03 | 13.3 | 11.85  | 13.85 | 2.36 | 416.52  | NANS |
| 1682 Female | 52 | 57.2   | 25.25 | 12.9 | 38.46  | 6.36  | 1.58 | 311.34  | NANS |
| 1687 Male   | 64 | 88.6   | 31.81 | 14.9 | 175.91 | 9.43  | 2.22 | 448.88  | NANS |
| 1688 Male   | 40 | 85.1   | 27.13 | 16.1 | 188.7  | 15.19 | 4.72 | 1235.63 | NANS |
| 1689 Female | 56 | 92.7   | 33.2  | 11.9 | 21.21  | 7.96  | 0.28 | 447.76  | NANS |
| 1702 Male   | 68 | 95     | 29.32 | 16.3 | 362.45 | 11.6  | 1.42 | 1191.6  | NANS |
| 1704 Female | 45 | 66.2   | 24.26 | 14.2 | 42.69  | 6.56  | 0.77 | 657.74  | NANS |
| 1706 Male   | 41 | 79.6   | 23.23 | 14.3 | 175.1  | 19.42 | 2.73 | 1353.05 | NANS |
| 1707 Male   | 29 | 71.4   | 24.28 | 15.8 | 152.19 | 11.83 | 4.56 | 854.2   | NANS |
| 1709 Male   | 66 | 80.2   | 25.31 | 17.5 | 57.1   | 15.02 | 1.87 | 1086.79 | NANS |
| 1711 Female | 63 | 128.3  | 47.99 | 12.5 | 708.06 | 9.64  | 1.2  | 617.85  | NANS |
| 1712 Male   | 72 | 96.55  | 33.25 | 15.8 | 634.5  | 11.38 | 3.38 | 639.62  | NANS |
| 1715 Male   | 37 | 85.7   | 25.48 | 15.4 | 197.49 | 21.91 | 4.01 | 1611.64 | NANS |
| 1717 Female | 43 | 80.4   | 29.86 | 13.7 | 12.51  | 12.89 | 2.35 | 1069.13 | NANS |
| 1718 Female | 65 | 53.1   | 23.6  | 13.7 | 66.9   | 6.68  | 0.74 | 699.81  | NANS |
| 1719 Male   | 43 |        |       | 16.4 | 79.97  | 8.62  | 3.85 | 687.67  | NANS |
| 1735 Male   | 63 | 57.9   | 21.63 | 11   | 336.07 | 14.73 | 5.89 | 999.76  | NANS |
| 1736 Female | 67 | 71.9   | 27    | 14.1 | 237.87 | 9.35  | 3.64 | 535.69  | NANS |
| 1738 Male   | 45 | 69.85  | 21.39 | 14.3 | 180.63 | 9.89  | 3.37 | 1613.33 | NANS |
| 1739 Male   | 26 | 91.9   | 29.4  | 14.9 | 148.39 | 14.8  | 2.13 | 766.24  | NANS |
| 1742 Male   | 28 | 99.9   | 31.82 | 16.2 | 160.96 | 11.41 | 2.96 | 1624.11 | NANS |
| 1745 Male   | 53 | 98.6   | 35.31 |      | 84.84  | 12.71 | 3.54 | 921.72  | NANS |
| 1746 Male   | 30 | 108.6  | 32.43 | 16.1 | 182.46 | 17.97 | 3.39 | 1192.31 | NANS |
| 1747 Male   | 78 | 79.7   | 25.44 | 14.3 | 131.08 | 7.03  | 1.48 | 456.34  | NANS |
| 1748 Female | 41 | 76.7   | 28.17 | 13.6 | 39.73  | 24.84 | 0.79 | 792.86  | NANS |
| 1749 Male   | 56 | 88.15  | 30.15 | 15.9 | 306.62 | 11.1  | 1.62 | 696.11  | NANS |
| 1758 Male   | 42 | 102.45 | 28.26 | 16.4 | 97.46  | 13.94 | 3.63 | 840.41  | NANS |
| 1767 Female | 60 | 69.5   | 29.27 | 15.6 | 105.61 | 10.01 | 4.05 | 1087.77 | NANS |
| 1770 Female | 48 | 80.9   | 29.64 | 13.4 | 155.51 | 11.22 | 2.04 | 1057.28 | NANS |
| 1771 Female | 45 | 81.8   | 30.71 | 12.3 | 15.24  | 6.97  | 1.86 | 528.42  | NANS |
| 1774 Female | 39 | 59     | 23.81 | 14.4 | 59.59  | 11.27 | 1.49 | 657.22  | NANS |
| 1776 Female | 25 |        |       | 13.8 | 50.36  | 9.52  | 1.14 | 929.33  | NANS |
| 1778 Male   | 65 | 85.6   | 29.31 | 13.2 | 651.6  | 12.93 | 5.91 | 718.33  | NANS |
| 1780 Male   | 47 | 79.8   | 29.63 | 17.4 | 199.6  | 25.13 | 2.27 | 1060.25 | NANS |
| 1781 Female | 52 | 70     | 30.14 | 12.5 | 41.7   | 7.52  | 0.93 | 639.67  | NANS |
| 1782 Male   | 82 | 66.6   | 25.07 | 16.3 | 68.28  | 5.37  | 0.89 | 414.31  | NANS |
| 1784 Male   | 76 | 106.4  | 38.38 | 14.3 | 246.81 | 11.91 | 0.67 | 610.05  | NANS |
| 1787 Male   | 67 |        |       | 14.9 | 40.55  | 9.51  | 2.92 | 2061.69 | NANS |

|             |    |        |       |      |        |       |      |         |      |
|-------------|----|--------|-------|------|--------|-------|------|---------|------|
| 1790 Male   | 33 |        |       | 16.1 | 628.71 | 12.94 | 5.71 | 1259.13 | NANS |
| 1804 Male   | 50 | 90.3   | 29.02 | 15   | 166.82 | 6.81  | 2.3  | 620.08  | NANS |
| 1815 Female | 74 | 71.35  | 25.43 | 11.9 | 111.99 | 9.16  | 1.04 | 635.33  | NANS |
| 1822 Female | 33 | 68.1   | 27.8  | 13   | 72.88  | 3.94  | 1.48 | 960.27  | NANS |
| 1823 Male   | 74 | 72.3   | 27.82 | 10.1 | 7.68   | 15.82 | 0.95 | 1440.35 | NANS |
| 1824 Female | 46 | 62     | 22.39 | 13.5 | 62.14  | 21.17 | 0.52 | 1223.82 | NANS |
| 1834 Male   | 62 | 119.15 | 46.37 | 14.3 | 220.51 | 12.85 | 0.83 | 1102.68 | NANS |
| 1835 Female | 61 | 73.9   | 31.12 | 13.6 | 52.12  | 7.68  | 1.32 | 478.97  | NANS |
| 1836 Female | 65 | 68.8   | 28.82 | 14   | 81.79  | 5.86  | 2.06 | 504.41  | NANS |
| 1838 Female | 59 | 73.7   | 27.07 | 13.7 | 106.87 | 9.06  | 1.49 | 585.1   | NANS |
| 1841 Female | 64 | 77.1   | 28.15 | 13.1 | 142.04 | 9.12  | 2.12 | 579.34  | NANS |
| 1845 Female | 29 | 52.5   | 20.64 | 14   | 39.77  | 8.21  | 2.45 | 523.43  | NANS |
| 1848 Female | 27 | 61.3   | 21.26 | 13.9 | 15.11  | 16.35 | 0.81 | 992.75  | NANS |
| 1849 Female | 49 | 64.6   | 25.3  | 13.8 | 92.54  | 14.88 | 1.18 | 827.94  | NANS |
| 1850 Female | 40 | 53.8   | 22.8  | 13   | 25.07  | 8.79  | 1.64 | 577.63  | NANS |
| 1869 Male   | 38 | 109.5  | 31.65 | 15.6 | 164.22 | 19.62 | 2.93 | 999.84  | NANS |
| 1870 Female | 43 | 65.6   | 27.23 | 14.1 | 195.83 | 7.35  | 1.7  | 776.92  | NANS |
| 1872 Male   | 58 | 96.15  | 31.79 | 15.2 | 116.52 | 9.58  | 1.79 | 764.34  | NANS |
| 1877 Female | 26 | 85.1   | 34.79 | 13.7 | 69.22  | 6.42  | 0.94 | 674.58  | NANS |
| 1881 Male   | 66 | 79.5   | 26.56 | 15.9 | 112.75 | 6.94  | 2.63 | 600.21  | NANS |
| 1882 Female | 44 | 76.2   | 28.33 | 14.2 | 260.31 | 17.91 | 1.99 | 1324.36 | NANS |
| 1884 Male   | 41 | 78.2   | 26.56 | 16.2 | 126.96 | 8.92  | 1.31 | 745.68  | NANS |
| 1886 Male   | 37 | 113.5  | 39.46 | 16.2 | 203.9  | 7.68  | 3.19 | 761.55  | NANS |
| 1904 Male   | 38 | 68.8   | 25.64 | 15.7 | 96.68  | 8.43  | 2.37 | 931.61  | NANS |
| 1905 Male   | 47 | 78.2   | 24.16 | 16.2 | 94.64  | 14.55 | 1.25 | 1669.93 | NANS |
| 1907 Male   | 47 | 95.5   | 30.83 | 14.9 | 84     | 21.04 | 2.12 | 1260.01 | NANS |
| 1908 Female | 41 | 69.3   | 27.69 |      | 76.25  | 9.42  | 1.21 | 960.67  | NANS |
| 1917 Female | 58 | 67.9   | 23.69 | 14   | 47.91  | 16.05 | 2.04 | 1448.24 | NANS |
| 1918 Male   | 41 | 102    | 27.67 | 13.8 | 184.95 | 26.09 | 9.07 | 1225.39 | NANS |
| 1935 Female | 42 | 58.1   | 25.52 | 13.1 | 75.25  | 16.03 | 3.05 | 915.93  | NANS |
| 1939 Female | 28 | 66.95  | 23.44 | 13.1 | 42.42  | 10.22 | 0.94 | 859.75  | NANS |
| 1942 Male   | 38 | 83.55  | 29.43 | 15.5 | 174.6  | 13.74 | 1.25 | 1321.36 | NANS |
| 1943 Male   | 43 | 93.4   | 30.19 | 15.8 | 271.9  | 9.93  | 2.09 | 895     | NANS |
| 1948 Female | 39 | 67.75  | 25.22 | 14.1 | 102.29 | 14.89 | 2.86 | 1092.94 | NANS |
| 1951 Male   | 56 | 84.3   | 29.14 | 15.7 | 155.37 | 25.68 | 4.79 | 1236.76 | NANS |
| 1953 Female | 68 | 69.6   | 30.12 | 13.5 | 248.06 | 9.61  | 2.3  | 1390.73 | NANS |
| 1955 Female | 32 | 80.55  | 32.93 | 14.8 | 14.88  | 13.97 | 1.08 | 560.92  | NANS |
| 1969 Male   | 61 |        |       | 15.1 | 249.99 | 10    | 1.35 | 1164.97 | NANS |
| 1973 Female | 50 | 69.05  | 26.67 | 14.1 | 156.99 | 8.62  | 0.44 | 832.13  | NANS |
| 1976 Female | 47 | 74.4   | 27.53 | 12.2 | 17.45  | 7.04  | 2.22 | 666.44  | NANS |
| 1977 Female | 70 | 86.65  | 32.41 | 13.8 | 171.87 | 7.36  | 0.68 | 966.69  | NANS |
| 1978 Male   | 61 | 137.95 | 37.46 | 17.9 | 122.57 | 12.56 | 2.66 | 1468.62 | NANS |
| 1983 Male   | 64 | 88.5   | 29.95 | 16.6 | 99.3   | 8.94  | 1.69 | 1112.04 | NANS |
| 1984 Male   | 59 | 120.5  | 38.07 | 15   | 353.91 | 15.04 | 0.84 | 868.5   | NANS |
| 1986 Female | 55 | 60.4   | 23.51 | 13.9 | 220.7  | 7.23  | 1.27 | 1838.58 | NANS |
| 1988 Female | 45 | 86     | 26.81 | 12.6 | 34.07  | 10.47 | 1.32 | 1119.01 | NANS |
| 1989 Male   | 60 | 97.5   | 27.24 | 14.7 | 786.84 | 29.29 | 3.43 | 1155.27 | NANS |
| 2001 Female | 59 | 83.9   | 32.61 | 15   | 71.48  | 7.95  | 1.18 | 1124.37 | NANS |
| 2003 Male   | 61 | 87     | 32.31 | 15.3 | 241.84 | 10.1  | 0.45 | 746.8   | NANS |
| 2004 Female | 40 | 69.9   | 26.05 | 14.6 | 93.01  | 14.62 | 5.23 | 807.08  | NANS |
| 2005 Male   | 41 | 71.9   | 23.91 | 14.4 | 37.43  | 12.76 | 3.27 | 899.54  | NANS |
| 2007 Female | 39 | 60.3   | 27.02 | 14.1 | 216.68 | 9.18  | 1.19 | 638     | NANS |
| 2010 Female | 43 | 59.75  | 23.49 | 13.4 | 273.67 | 8.53  | 2.31 | 686.68  | NANS |
| 2011 Male   | 33 | 78.7   | 25.93 | 16.4 | 79.32  | 12.58 | 3.46 | 1641.34 | NANS |
| 2012 Female | 26 | 74.45  | 27.58 | 14.1 | 82.03  | 11.73 | 1.58 | 1225.25 | NANS |
| 2013 Male   | 48 | 80.6   | 26.14 | 14.4 | 639.83 | 12.27 | 1.52 | 1214.12 | NANS |
| 2014 Female | 39 | 69.6   | 24.75 | 13.5 | 12.83  | 19.01 | 3.02 | 604.18  | NANS |
| 2015 Female | 51 | 68.55  | 26.45 | 13.1 | 10.43  | 9.21  | 1.02 | 438.55  | NANS |



|             |    |       |       |      |        |       |      |         |      |
|-------------|----|-------|-------|------|--------|-------|------|---------|------|
| 2020 Male   | 53 | 63.9  | 21.83 | 14.7 | 342.61 | 16.13 | 1.97 | 1166.38 | NANS |
| 2022 Male   | 28 | 80.5  | 24.87 | 13.9 | 131.61 | 17.88 | 4.15 | 1188.79 | NANS |
| 2023 Female | 45 | 69.1  | 23.49 | 13.1 | 17.42  | 12.79 | 0.74 | 857.86  | NANS |
| 2025 Female | 53 | 62.3  | 25.37 | 12.6 | 27.47  | 12.23 | 3.22 | 1104.6  | NANS |
| 2034 Female | 63 | 64.5  | 25.51 | 13.6 | 32.68  | 7.15  | 1.56 | 914.35  | NANS |
| 2041 Male   | 52 | 97.8  | 30.63 | 14.8 | 406.24 | 14.4  | 1.54 | 955.34  | NANS |
| 2042 Male   | 62 | 94.8  | 28.81 | 14.2 | 576.53 | 12.24 | 3.06 | 813.72  | NANS |
| 2051 Female | 21 | 78.4  | 24.91 | 13.4 | 20.24  | 8.64  | 0.12 | 670.74  | NANS |
| 2052 Female | 75 | 67.2  | 26.58 | 13.6 | 155.72 | 7.79  | 0.97 | 614.96  | NANS |
| 2054 Female | 40 | 56.9  | 22.12 | 15.9 | 33.04  | 14.77 | 3.82 | 705.64  | NANS |
| 2060 Female | 52 | 68.8  | 24.88 | 13.2 | 91     | 12.13 | 1.44 | 1355.18 | NANS |
| 2062 Female | 20 | 57.9  | 21.42 | 12.1 | 13.48  | 11.26 | 0.49 | 1188.36 | NANS |
| 2075 Female | 32 | 98.5  | 34.9  | 13.9 | 10.64  | 7.16  | 1.67 | 713.34  | NANS |
| 2077 Female | 20 | 59.5  | 24.23 | 13.4 | 27.93  | 8.04  | 1.79 | 799.96  | NANS |
| 2078 Female | 51 | 83.7  | 33.7  | 13.2 | 45.13  | 13.99 | 1.14 | 870.4   | NANS |
| 2081 Male   | 48 | 119.6 | 37.75 | 17   | 187.46 | 8.88  | 1.52 | 814.41  | NANS |
| 2083 Male   | 55 | 88.3  | 26.95 | 16.1 | 166.17 | 12.17 | 1.01 | 834.87  | NANS |
| 2084 Female | 18 | 43.85 | 18.11 | 12.9 | 40.41  | 7.98  | 0.43 | 509.18  | NANS |
| 2091 Female | 21 | 98.3  | 34.62 | 13.6 | 162.06 | 10.8  | 0.82 | 622.79  | NANS |
| 2092 Male   | 20 | 89.6  | 28.76 | 16.6 | 165.55 | 10.33 | 1.63 | 517.81  | NANS |
| 2101 Female | 55 | 98.35 | 34.39 | 14.6 | 68.6   | 8.07  | 0.6  | 586.74  | NANS |
| 2106 Male   | 44 | 86.3  | 29.21 | 15.4 | 658.04 | 11.26 | 3.68 | 846.7   | NANS |
| 2107 Female | 58 | 89.8  | 35.57 | 12   | 126.71 | 8.08  | 2.54 | 579.87  | NANS |
| 2110 Female | 30 | 63    | 26.53 | 13.8 | 19.88  | 12.33 | 2    | 530.11  | NANS |
| 2115 Female | 20 | 82    | 30.16 | 14.1 | 31.23  | 11    | 3.21 | 848.7   | NANS |
| 2116 Male   | 20 | 99.4  | 30.04 | 15.4 | 196.77 | 8.99  | 4.02 | 350.98  | NANS |
| 2120 Male   | 23 | 100.6 | 32.89 | 15.6 | 149.15 | 7.08  | 0.92 | 888.97  | NANS |
| 2121 Female | 40 | 68.9  | 27.05 | 14.9 | 103.01 | 7.47  | 2.28 | 739.01  | NANS |
| 2124 Female | 35 | 70.1  | 29.6  | 14.5 | 62.14  | 8.23  | 1.57 | 734.28  | NANS |
| 2125 Female | 50 | 73.2  | 30.19 |      | 15.41  | 11.59 | 3.1  | 990.42  | NANS |
| 2129 Female | 46 | 68.1  | 27.91 | 10.5 | 15.83  | 9.2   | 2.45 | 433.78  | NANS |
| 2131 Female | 54 |       |       | 13.9 | 192.97 | 9.78  | 3.34 | 597.05  | NANS |
| 2134 Male   | 21 | 72.3  | 26.36 | 15.8 | 37.71  | 15.05 | 1.95 | 855.58  | NANS |
| 2135 Female | 50 | 81.65 | 22.98 | 12.3 | 39.59  | 6.3   | 1.79 | 382.81  | NANS |
| 2136 Female | 45 | 82.3  | 32.72 | 14   | 28.96  | 6.59  | 2.56 | 377.9   | NANS |
| 2137 Male   | 46 | 102.3 | 31.02 | 17.2 | 202.03 | 17.96 | 4.47 | 800.11  | NANS |
| 2138 Female | 38 |       |       | 12.4 | 11.98  | 6.59  | 0.3  | 444.78  | NANS |
| 2153 Female | 43 | 77    | 32.94 |      | 17.63  | 6.05  | 1.48 | 479.8   | NANS |
| 2154 Female | 60 | 113.4 | 43.8  | 12.6 | 181.61 | 14.37 | 1.97 | 926.8   | NANS |
| 2160 Female | 50 | 96.3  | 41.41 | 13.5 | 197.39 | 4.62  | 0.82 | 331.37  | NANS |
| 2165 Female | 54 | 81.65 | 29.17 | 12.9 | 229.45 | 9.33  | 0.88 | 755.5   | NANS |
| 2167 Female | 23 | 61.1  | 20.9  | 13   | 22.81  | 7.23  | 3.08 | 985.42  | NANS |
| 2169 Female | 30 | 65.8  | 24.05 | 14.3 | 7.26   | 6.37  | 2.36 | 238.46  | NANS |
| 2171 Male   | 28 | 58.6  | 21.14 | 15.4 | 208.83 | 11.14 | 3.84 | 570.18  | NANS |
| 2172 Female | 70 |       |       | 13.4 | 230.4  | 9.78  | 2.92 | 527.62  | NANS |
| 2173 Male   | 30 | 95.7  | 32.5  | 16   | 119.61 | 14.06 | 3.46 | 946.6   | NANS |
| 2176 Male   | 60 | 86.1  | 30.29 | 14.5 | 172.91 | 7.39  | 2.72 | 770.49  | NANS |
| 2180 Male   | 24 | 104.1 | 29.14 | 15.3 | 107.72 | 9.26  | 3.34 | 724.83  | NANS |
| 2181 Female | 50 | 77.1  | 27.85 | 13.3 | 24.34  | 12.03 | 0    | 1388.71 | NANS |
| 2183 Female | 50 | 54.1  | 22.37 | 13.4 | 30.25  | 8.27  | 0.76 | 656.23  | NANS |
| 2184 Female | 24 | 53.5  | 20.56 | 14   | 24.6   | 14.27 | 1.59 | 963.87  | NANS |
| 2185 Male   | 28 | 105.5 | 27.97 | 15.7 | 686.99 | 9.22  | 1.1  | 1518.22 | NANS |
| 2188 Female | 41 | 91.2  | 32.12 | 13.6 | 52.53  | 10.69 | 2.73 | 1221.58 | NANS |
| 2191 Female | 20 | 83.5  | 32.78 | 14.1 | 35.16  | 12.37 | 3.74 | 814.45  | NANS |
| 2194 Female | 46 | 121.1 | 48.33 | 11.9 | 15.75  | 12.63 | 0.54 | 722.31  | NANS |
| 2201 Male   | 20 | 74.3  | 23.35 | 15   | 79.37  | 17.88 | 6.85 | 896.51  | NANS |
| 2203 Male   | 54 | 97.7  | 33.1  | 14.2 | 250.11 | 16.81 | 2.59 | 1063.54 | NANS |
| 2204 Male   | 52 | 96.25 | 29.91 | 15.9 | 85.93  | 13.36 | 3.43 | 1572.13 | NANS |

|             |    |        |       |      |        |       |      |         |      |
|-------------|----|--------|-------|------|--------|-------|------|---------|------|
| 2205 Female | 23 | 49     | 19.36 | 13.8 | 42.31  | 9.37  | 1.87 | 930.09  | NANS |
| 2208 Male   | 46 | 73.3   | 22.23 | 16.4 | 141.18 | 6.89  | 1.65 | 683.01  | NANS |
| 2210 Male   | 43 | 81.5   | 24.85 | 16.9 | 269.77 | 13.73 | 1.92 | 1134.19 | NANS |
| 2211 Male   | 55 | 111.3  | 33.97 | 14.8 | 83.46  | 11.93 | 1.18 | 1085.36 | NANS |
| 2212 Female | 30 | 75.6   | 26.19 | 12.6 | 85.03  | 12.59 | 1.88 | 792.57  | NANS |
| 2213 Male   | 52 | 103.6  | 33.14 | 17   | 698.14 | 12.07 | 0.79 | 1477.18 | NANS |
| 2214 Female | 38 | 76.8   | 25.25 | 12.7 | 15.74  | 9.98  | 1.77 | 724.78  | NANS |
| 2218 Male   | 40 | 93.2   | 30.33 | 16.1 | 203.46 | 11.13 | 0.54 | 959.97  | NANS |
| 2219 Female | 40 | 80.6   | 30.94 |      | 40.26  | 12.91 | 0.93 | 1237.68 | NANS |
| 2235 Male   | 34 | 80.5   | 27.69 | 16.4 | 75.29  | 13.79 | 2.42 | 674.45  | NANS |
| 2236 Male   | 37 | 75     | 25.41 | 13.5 | 119.12 | 12.34 | 1.76 | 856.2   | NANS |
| 2238 Female | 32 | 71.75  | 23.75 | 12   | 30.75  | 10.4  | 1.34 | 777.26  | NANS |
| 2240 Male   | 51 |        |       | 15.5 | 293.18 | 17.02 | 4.22 | 1268.11 | NANS |
| 2243 Female | 35 | 84.3   | 30.89 | 14.2 | 86.95  | 15.84 | 0.26 | 1187.41 | NANS |
| 2244 Male   | 44 | 102.9  | 29.97 | 17.5 | 156.4  | 16.69 | 2.41 | 1148.46 | NANS |
| 2246 Male   | 38 | 113    | 35.99 | 16.7 | 134.64 | 6.78  | 1.6  | 709.61  | NANS |
| 2249 Female | 46 | 64.4   | 23.94 | 14.8 | 23.06  | 12.2  | 1.67 | 985.89  | NANS |
| 2255 Male   | 47 | 92.8   | 33.56 | 16.3 | 136.5  | 21.73 | 4.76 | 694.55  | NANS |
| 2256 Female | 24 | 66     | 25.02 | 14.7 | 41.7   | 8.63  | 0.63 | 616.83  | NANS |
| 2272 Male   | 45 | 93.2   | 29.09 | 15.2 | 77.58  | 17.49 | 4.28 | 695.23  | NANS |
| 2276 Male   | 31 | 78     | 23.81 | 14.8 | 170.96 | 12.63 | 1.79 | 614     | NANS |
| 2277 Male   | 39 | 97.6   | 32.24 | 15.9 | 181.73 | 16.94 | 3.3  | 1332.17 | NANS |
| 2278 Female | 43 | 100.5  | 36.04 | 12.5 | 9.7    | 8.13  | 1.96 | 546.71  | NANS |
| 2282 Male   | 48 | 80.5   | 27.34 | 16.6 | 84.19  | 23.77 | 2.32 | 1336.2  | NANS |
| 2284 Male   | 51 | 83.4   | 30.63 | 17   | 202.95 | 9.12  | 4.89 | 668.23  | NANS |
| 2286 Male   | 47 | 80.8   | 27.15 |      | 162.03 | 14.4  | 2.58 | 855.74  | NANS |
| 2288 Male   | 45 |        |       | 15.8 | 210.17 | 24.39 | 6.7  | 981.57  | NANS |
| 2303 Female | 44 | 68.8   | 24.7  | 13.9 | 73.6   | 9.73  | 1.7  | 247.77  | NANS |
| 2304 Male   | 30 | 80.95  | 26.61 | 18.9 | 349.77 | 10.82 | 2.5  | 749.3   | NANS |
| 2308 Female | 43 | 72.55  | 23.69 | 11.2 | 7.21   | 9.33  | 2.2  | 719.81  | NANS |
| 2310 Male   | 18 | 66.5   | 20.82 | 15.9 | 124.42 | 17.99 | 1.82 | 1002.21 | NANS |
| 2311 Male   | 24 | 75.6   | 26.44 | 15.7 | 108.09 | 14.34 | 2.53 | 789.48  | NANS |
| 2313 Male   | 21 | 86     | 27.33 | 14.1 | 72.38  | 9.06  | 2.47 | 1063.75 | NANS |
| 2314 Female | 47 | 73     | 24.5  |      | 26.16  | 13.56 | 3.42 | 1752.78 | NANS |
| 2315 Male   | 24 | 79.3   | 24.26 | 14.7 | 91.06  | 15.08 | 2.69 | 1309.83 | NANS |
| 2316 Male   | 31 | 83.8   | 23.96 | 16.8 | 116.52 | 13.48 | 4.3  | 1013.61 | NANS |
| 2317 Male   | 25 | 80.6   | 26.62 | 15.5 | 59.86  | 14.64 | 2.93 | 1078.97 | NANS |
| 2335 Male   | 59 | 79.4   | 26.71 | 15.4 | 198.06 | 13.34 | 1.84 | 1359.51 | NANS |
| 2341 Male   | 54 | 74.2   | 24.56 | 16.7 | 165.41 | 17.59 | 4.27 | 1617.63 | NANS |
| 2342 Male   | 20 | 81.4   | 26.34 | 17.2 | 32.03  | 11.9  | 4.01 | 570.05  | NANS |
| 2344 Female | 23 | 72.1   | 28.31 | 13.9 | 78.89  | 9.22  | 1.2  | 1065.89 | NANS |
| 2347 Female | 44 | 67.85  | 26.7  | 15   | 34.78  | 15.79 | 0.36 | 820.94  | NANS |
| 2348 Male   | 42 | 86.65  | 31.33 | 15.8 | 198.14 | 9.19  | 2.76 | 1090.49 | NANS |
| 2352 Female | 26 | 63.1   | 24.31 | 12.8 | 17.98  | 6.57  | 2    | 595.87  | NANS |
| 2353 Male   | 22 | 81.45  | 24.75 | 16   | 69.16  | 14.73 | 5.5  | 1537.73 | NANS |
| 2354 Male   | 59 | 96.5   | 33.55 | 15.1 | 119.44 | 12.47 | 2.51 | 910.35  | NANS |
| 2355 Male   | 53 | 108.45 | 30.3  | 14   | 10.85  | 18.05 | 1.21 | 1168.88 | NANS |
| 2356 Male   | 65 | 87.9   | 28.03 | 16.6 | 588.87 | 12.91 | 5.64 | 1363.6  | NANS |
| 2367 Female | 56 | 64.4   | 25.67 | 12.6 | 15.52  | 14.7  | 3.98 | 853.31  | NANS |
| 2368 Female | 61 | 74.8   | 28.47 | 14.8 | 185.54 | 10.03 | 0.96 | 1340.54 | NANS |
| 2369 Male   | 45 | 88     | 28.41 | 15.6 | 121.94 | 13.05 | 2.42 | 863.85  | NANS |
| 2370 Male   | 50 | 87.4   | 28.18 | 15.5 | 227.39 | 19.1  | 3.97 | 798.39  | NANS |
| 2372 Female | 21 | 63.9   | 22.06 | 14.3 | 24.54  | 19.63 | 6.94 | 1160.52 | NANS |
| 2373 Male   | 21 | 101.9  | 29.9  | 15.2 | 94.09  | 22.48 | 3.56 | 1654.67 | NANS |
| 2378 Female | 39 | 81.8   | 30.45 | 14.5 | 296.78 | 7.8   | 0.31 | 426.78  | NANS |
| 2385 Female | 51 | 55.6   | 22.33 | 13.7 | 49.94  | 11.57 | 0    | 1387.81 | NANS |
| 2388 Female | 24 | 53.4   | 21.64 | 12.8 | 21.21  | 9.98  | 4.58 | 804.13  | NANS |
| 2393 Male   | 21 | 65.3   | 20.52 | 14.8 | 50.18  | 24.9  | 3.72 | 1597.78 | NANS |

|             |    |        |       |      |        |       |      |         |      |
|-------------|----|--------|-------|------|--------|-------|------|---------|------|
| 2395 Male   | 19 | 81.3   | 24.52 | 17.9 | 109.31 | 18.15 | 2.51 | 1972.28 | NANS |
| 2396 Female | 37 | 73.2   | 27.65 | 11.6 | 14.88  | 16.7  | 1.11 | 1310.59 | NANS |
| 2401 Male   | 56 | 143.55 | 44.16 | 13.6 | 321.81 | 20.85 | 4.42 | 1483.02 | NANS |
| 2403 Male   | 20 | 72.4   | 21.04 | 14.8 | 68.57  | 24.87 | 2.84 | 1547.39 | NANS |
| 2404 Female | 26 | 54.35  | 22.48 | 13.3 | 29.18  | 21.84 | 0.18 | 658.5   | NANS |
| 2406 Male   | 27 | 64     | 22.15 | 14.5 | 103.44 | 10.22 | 2.53 | 1704.91 | NANS |
| 2409 Female | 28 | 59.65  | 22.34 | 12.8 | 28.96  | 18.4  | 0.97 | 1016.96 | NANS |
| 2411 Male   | 19 | 70     | 24.92 | 14.1 | 180.08 | 16.71 | 3.29 | 1442.4  | NANS |
| 2412 Male   | 19 | 62.8   | 20.07 | 12.8 | 245.47 | 15.38 | 4.36 | 1313.17 | NANS |
| 2418 Male   | 18 | 108.3  | 32.2  | 15.3 | 33.49  | 8.35  | 1.76 | 493.8   | NANS |
| 2421 Female | 19 | 69     | 25.31 | 10.8 | 16.72  | 12.08 | 2.06 | 1025.2  | NANS |
| 2424 Male   | 19 | 73.9   | 23.88 | 15.5 | 78.81  | 11.86 | 2.13 | 1127.47 | NANS |
| 2428 Male   | 20 | 92.5   | 28.74 | 15   | 140.29 | 9.65  | 3.6  | 831.33  | NANS |
| 2437 Female | 25 | 69.6   | 26.07 | 13.5 | 47.22  | 7.01  | 2.29 | 670.05  | NANS |
| 2438 Male   | 23 | 89.4   | 26.81 | 15.9 | 52.87  | 17.67 | 5.56 | 2280.24 | NANS |
| 2439 Female | 23 | 53.95  | 19.21 | 13.9 | 114.16 | 5.85  | 1.22 | 662.03  | NANS |
| 2442 Female | 19 | 70.6   | 25.16 | 13.9 | 50.57  | 11.67 | 2.09 | 822.42  | NANS |
| 2443 Female | 19 | 60.1   | 21.78 | 13.7 | 25.73  | 11.16 | 1.46 | 944.68  | NANS |
| 2444 Male   | 22 | 82.5   | 24.69 | 16.1 | 132.94 | 19.41 | 0.57 | 965.59  | NANS |
| 2445 Male   | 21 | 80.3   | 24.73 | 17.1 | 74.26  | 15.34 | 0.98 | 1876.66 | NANS |
| 2446 Male   | 22 | 105.9  | 27.65 | 15.6 | 35.96  | 35.98 | 1.77 | 1735.23 | NANS |
| 2451 Male   | 25 | 89.6   | 25.49 | 15.5 | 90.79  | 24.74 | 4.76 | 1516.23 | NANS |
| 2452 Male   | 24 | 88.8   | 26.69 | 16.2 | 54.21  | 7.57  | 2.78 | 771.68  | NANS |
| 2454 Female | 20 | 66.2   | 24.35 | 13.9 | 54.41  | 7.34  | 1.8  | 546.67  | NANS |
| 2456 Female | 20 | 96.4   | 31.02 | 14.1 | 50.19  | 4.68  | 0    | 622.4   | NANS |
| 2458 Female | 21 | 76.95  | 24.31 | 13.6 | 85.78  | 10.81 | 5.1  | 890.93  | NANS |
| 2470 Female | 28 | 64.7   | 23.31 | 13.1 | 73.99  | 8.66  | 2.41 | 526.63  | NANS |
| 2474 Male   | 28 | 93.4   | 28.35 | 14.9 | 185.31 | 15.37 | 3    | 1852.32 | NANS |
| 2476 Female | 22 | 63.8   | 21.69 | 13.8 | 60.68  | 5.06  | 0    | 927.32  | NANS |
| 2484 Male   | 26 | 70.4   | 22.47 | 15.4 | 68.11  | 31.55 | 3.72 | 1698.83 | NANS |
| 2487 Male   | 26 | 86.4   | 24.81 | 15.9 | 61.11  | 18.89 | 1.38 | 561.33  | NANS |
| 2489 Female | 23 | 76.7   | 31.28 | 13   | 27.65  | 6.86  | 1.44 | 526.12  | NANS |
| 2491 Female | 23 | 63     | 21.15 | 13.1 | 27.64  | 16.25 | 1.62 | 904.79  | NANS |
| 2492 Female | 22 | 67.5   | 24.06 | 15.4 | 68.23  | 9.67  | 0.69 | 523.45  | NANS |
| 2496 Male   | 33 | 79.7   | 24.44 | 15.3 | 117.27 | 11.1  | 5.45 | 967.23  | NANS |
| 2501 Male   | 25 | 74.55  | 22.14 | 16.1 | 17.77  | 19.35 | 5.59 | 1082.31 | NANS |
| 2505 Female | 66 | 70.7   | 29.2  | 12.5 | 63.21  | 10.53 | 3.31 | 618     | NANS |
| 2506 Female | 73 | 71.2   | 31.43 | 14.5 | 131.41 | 7.19  | 0.9  | 561.66  | NANS |
| 2507 Female | 74 | 90     | 33.1  | 14.2 | 75.68  | 7.41  | 1.34 | 482.86  | NANS |
| 2508 Female | 74 | 61.3   | 30.15 | 17   | 60.48  | 11.16 | 1.48 | 1293.66 | NANS |
| 2509 Female | 23 | 75.1   | 27.16 | 13   | 58.25  | 12.84 | 2.86 | 626.29  | NANS |
| 2511 Male   | 21 | 79.7   | 22.53 | 14.8 | 162.27 | 9.75  | 2.24 | 1185.61 | NANS |
| 2512 Female | 55 | 81.2   | 29.86 | 13.1 | 153.03 | 11.94 | 2.18 | 613.51  | NANS |
| 2513 Female | 57 | 78.6   | 28.73 | 14   | 67.55  | 8.99  | 1.58 | 1009.53 | NANS |
| 2516 Male   | 76 | 71     | 24.54 | 14.7 | 227.18 | 8.42  | 0.7  | 661.59  | NANS |
| 2517 Male   | 84 |        |       | 15   | 45.46  | 6.29  | 2.76 | 385.35  | NANS |
| 2525 Female | 22 | 68.1   | 21.96 | 14.1 | 35.91  | 16.99 | 3.12 | 569.91  | NANS |
| 2526 Male   | 25 | 93.3   | 25.52 | 17.3 | 249.94 | 20.56 | 3.78 | 2493.77 | NANS |
| 2527 Male   | 21 | 95.5   | 25.35 | 15.3 | 60.12  | 16.6  | 3.43 | 1669.26 | NANS |
| 2529 Male   | 43 | 79.55  | 23.86 | 16.4 | 69.73  | 16.78 | 3.98 | 1198.92 | NANS |
| 2530 Male   | 21 | 85.3   | 28.9  | 18   | 143.02 | 7.87  | 0.39 | 547.42  | NANS |
| 2535 Male   | 37 | 88.1   | 29.07 |      | 231.07 | 22.75 | 3.51 | 975.32  | NANS |
| 2536 Female | 72 | 81.1   | 31.4  | 12.6 | 146.97 | 11.75 | 1.94 | 570.01  | NANS |
| 2538 Male   | 37 | 107.9  | 32.11 | 17   | 297.81 | 15.09 | 5.48 | 1032.69 | NANS |
| 2541 Male   | 18 | 69.1   | 21.83 | 15.8 | 72.69  | 17.28 | 5.81 | 954.1   | NANS |
| 2545 Male   | 72 | 77.35  | 27.94 | 15.4 | 204.06 | 13.81 | 2.45 | 1385.19 | NANS |
| 2547 Male   | 19 | 81.8   | 25.56 | 15.7 | 109.55 | 13.15 | 2.81 | 902.19  | NANS |
| 2548 Male   | 38 | 84.45  | 25.38 |      | 93.3   | 16.31 | 3.24 | 890.39  | NANS |

|              |    |        |       |      |        |         |        |         |      |
|--------------|----|--------|-------|------|--------|---------|--------|---------|------|
| 2553 Male    | 19 | 79.9   | 23.1  | 16.8 | 107.6  | 12.39   | 3.16   | 831.97  | NANS |
| 2554 Male    | 18 | 75.2   | 24.08 | 15.9 | 43.93  | 17.99   | 3.28   | 1354.78 | NANS |
| 2557 Male    | 20 | 76.8   | 25.6  | 13.8 | 60.26  | 11.49   | 1      | 821.26  | NANS |
| 2565 Male    | 24 | 101.3  | 32.48 | 14.5 | 168.09 | 10.91   | 1.72   | 1196.81 | NANS |
| 2575 Male    | 77 | 81.4   | 30.08 | 13.8 | 143.71 | 17.05   | 0.78   | 725     | NANS |
| 2577 Male    | 21 | 66.8   | 22.48 |      | 121.99 | 22.79   | 9.88   | 751.82  | NANS |
| 2579 Male    | 22 | 69.4   | 21.66 | 15.5 | 63.69  | 13.57   | 2.15   | 807.49  | NANS |
| 2582 Female  | 22 | 70.95  | 24.32 | 15.3 | 78.57  | 7.97    | 1.28   | 637.93  | NANS |
| 2586 Male    | 23 | 85.2   | 27.69 | 15.7 | 306.15 | 5.56    | 1.22   | 860.97  | NANS |
| 2589 Male    | 22 | 93.35  | 29.27 | 15   | 114.47 | 14.38   | 9.34   | 996.6   | NANS |
| 2593 Male    | 20 | 69.95  | 21.23 | 15.9 | 79.24  | 10.01   | 2.13   | 1595.53 | NANS |
| 2595 Male    | 39 | 91.8   | 31.47 | 16.8 | 135.42 | 9.76    | 1.74   | 1327.38 | NANS |
| 2596 Female  | 77 |        |       | 11.2 | 87.37  | 8.11    | 0.98   | 666.25  | NANS |
| 10120 Female | 46 | 97.2   | 34.13 | 13.4 | 42     | 8.2786  | 0      | 840.3   | NDNS |
| 10124 Female | 33 | 72.7   | 26.92 | 13.7 | 44     | 12.8332 | 2.8492 | 937.2   | NDNS |
| 10130 Male   | 43 | 101.4  | 35.69 | 14.1 | 257    | 18.1305 | 4.2811 | 978.6   | NDNS |
| 10132 Male   | 53 | 78.4   | 26.95 | 13.9 | 9      | 13.9714 | 1.5132 | 1312.4  | NDNS |
| 10211 Female | 42 | 67.4   | 24.46 | 10.4 | 11     | 15.4419 | 0.6183 | 1064    | NDNS |
| 10225 Male   | 22 | 78.9   | 24.72 | 15.2 | 110    | 13.8829 | 3.2925 | 861.8   | NDNS |
| 10229 Female | 41 | 107.65 | 47.91 | 13.5 | 25     | 9.3092  | 1.0716 | 1116.6  | NDNS |
| 10301 Female | 45 | 97.95  | 41.65 | 14.1 | 98     | 11.716  | 1.9599 | 1026.3  | NDNS |
| 10303 Male   | 44 | 74.55  | 24.91 | 14.9 | 20     | 21.7756 | 0.9721 | 886     | NDNS |
| 10311 Female | 36 | 60.95  | 23.68 | 12.5 | 25     | 10.214  | 0.7514 | 1091.2  | NDNS |
| 10312 Male   | 37 | 73.5   | 25.54 | 16   | 87     | 12.3254 | 0      | 952.2   | NDNS |
| 10320 Female | 47 | 100.35 | 39.84 | 14   | 93     | 17.6957 | 0.7752 | 946.7   | NDNS |
| 10326 Female | 21 | 51.25  | 18.94 | 14   | 59     | 4.4638  | 1.0862 | 250.8   | NDNS |
| 10328 Female | 33 | 71.3   | 26.43 | 13.2 | 25     | 10.9391 | 1.3252 | 758.8   | NDNS |
| 10329 Male   | 43 | 73.85  | 22.31 | 17   | 402    | 6.5369  | 2.241  | 672.1   | NDNS |
| 10331 Male   | 59 | 68.5   | 21.52 | 16.7 | 219    | 8.3502  | 2.0942 | 582.2   | NDNS |
| 10338 Male   | 24 | 114.7  | 34.55 | 14   | 80     | 8.3644  | 2.6801 | 752.3   | NDNS |
| 10340 Female | 31 | 70.35  | 23.97 | 14   | 50     | 10.0803 | 2.4285 | 1016.8  | NDNS |
| 10401 Male   | 39 | 63.9   | 24.81 | 15   | 17     | 16.8064 | 4.0819 | 1251.3  | NDNS |
| 10402 Female | 36 | 94.2   | 40.99 | 12.9 | 226    | 18.1342 | 0.5512 | 1397.9  | NDNS |
| 10403 Female | 24 | 62.5   | 22.8  | 14.1 | 103    | 9.0779  | 2.5112 | 604.6   | NDNS |
| 10412 Male   | 36 | 67.45  | 22.75 | 14.1 | 119    | 24.1811 | 2.6109 | 1783.4  | NDNS |
| 10422 Female | 39 | 63.7   | 22.22 | 12.9 | 40     | 11.0421 | 2.8815 | 1017.9  | NDNS |
| 10440 Female | 38 | 79.2   | 32.01 | 12.8 | 38     | 10.5054 | 1.0929 | 813.9   | NDNS |
| 10506 Male   | 56 | 117.25 | 38.79 | 15.1 | 71     | 9.062   | 3.6838 | 539.4   | NDNS |
| 10522 Male   | 43 | 120.5  | 36.84 | 15.1 | 139    | 16.8176 | 4.6866 | 1263    | NDNS |
| 10527 Male   | 61 | 86.6   | 27.61 | 15.8 | 223    | 10.6531 | 1.4554 | 1134    | NDNS |
| 10528 Male   | 53 | 90.6   | 28.24 | 14.3 | 149    | 16.63   | 6.0378 | 1364.3  | NDNS |
| 10534 Female | 30 | 74.25  | 30.07 | 13.6 | 30     | 12.8852 | 0      | 1080.1  | NDNS |
| 10537 Female | 26 | 54.35  | 20.61 | 14   | 32     | 5.7255  | 0.8602 | 501.5   | NDNS |
| 10538 Female | 26 | 61     | 22.02 | 12.7 | 48     | 6.4255  | 0.2986 | 650.2   | NDNS |
| 10540 Male   | 51 | 65.1   | 20.98 | 13.6 | 47     | 11.0873 | 0.623  | 1226.1  | NDNS |
| 10602 Female | 62 | 94.8   | 36.41 | 14.4 | 50     | 11.5945 | 1.4193 | 969.6   | NDNS |
| 10614 Female | 39 | 80.1   | 30.11 |      | 29     | 9.5955  | 5.7091 | 365.5   | NDNS |
| 10616 Female | 62 | 57.2   | 20.91 | 14.7 | 48     | 5.78    | 2.2442 | 751.3   | NDNS |
| 10617 Male   | 38 | 75.9   | 26.67 | 16.6 | 79     | 13.2273 | 4.1287 | 1067.1  | NDNS |
| 10618 Female | 29 | 71.3   | 28.91 | 14.4 | 26     | 15.1575 | 0.2537 | 642.9   | NDNS |
| 10624 Female | 43 | 54.25  | 21.66 | 13.9 | 39     | 5.835   | 1.3246 | 824.8   | NDNS |
| 10626 Male   | 25 | 107.3  | 38.68 | 14.3 | 131    | 7.3534  | 3.1805 | 748.8   | NDNS |
| 10706 Male   | 47 | 65.2   | 19.93 | 14.8 | 13     | 13.1344 | 2.0773 | 1120.8  | NDNS |
| 10709 Male   | 41 | 75.8   | 26.81 | 14.8 | 19     | 15.504  | 0.9964 | 1214    | NDNS |
| 10710 Female | 64 | 85.7   | 36.87 | 13.8 | 46     | 8.0746  | 1.3154 | 680.7   | NDNS |
| 10713 Male   | 45 | 63.7   | 22.34 | 14.9 | 47     | 10.2036 | 3.5814 | 890.8   | NDNS |
| 10717 Female | 62 | 85.15  | 33.45 | 12.9 | 70     | 11.3358 | 2.8056 | 979.8   | NDNS |
| 10719 Female | 35 | 67.3   | 27.85 | 14.6 | 57     | 5.4599  | 1.2075 | 509.8   | NDNS |

|              |    |        |       |      |     |         |        |             |
|--------------|----|--------|-------|------|-----|---------|--------|-------------|
| 10722 Male   | 61 | 82.1   | 25.9  | 13.9 | 178 | 14.3775 | 2.8925 | 978 NDNS    |
| 10726 Male   | 43 | 122.35 | 37.12 | 14.7 | 134 | 14.594  | 1.0503 | 1040.9 NDNS |
| 10731 Male   | 38 | 93.6   | 30.72 | 14.5 | 125 | 10.3246 | 4.4448 | 382.3 NDNS  |
| 10734 Male   | 48 | 81.5   | 26.54 | 14.2 | 63  | 12.0903 | 2.9145 | 852.4 NDNS  |
| 10736 Female | 36 | 69.85  | 27.03 | 15.1 | 23  | 5.952   | 1.3092 | 499.4 NDNS  |
| 10810 Male   | 31 | 100.1  | 31.02 | 15.2 | 74  | 13.3361 | 5.5374 | 772.2 NDNS  |
| 10815 Male   | 37 | 82     | 26.28 | 14.7 | 140 | 15.857  | 4.7425 | 879.6 NDNS  |
| 10816 Female | 39 | 102.6  | 39.56 | 13.4 | 24  | 10.0002 | 0.9226 | 465.5 NDNS  |
| 10905 Female | 30 | 57.05  | 21.33 | 13.3 | 62  | 18.4591 | 9.6032 | 793.9 NDNS  |
| 10909 Male   | 32 | 84.4   | 31.55 | 16.7 | 77  | 30.1935 | 6.6249 | 2696.8 NDNS |
| 10912 Male   | 46 | 66.2   | 23.32 | 15.5 | 114 | 19.857  | 2.0777 | 1116.8 NDNS |
| 10913 Female | 53 | 60.85  | 22.31 | 12.5 | 32  | 12.3763 | 0.7449 | 1233.1 NDNS |
| 10922 Female | 53 | 76.7   | 31.02 | 13.2 | 142 | 9.2157  | 0.9804 | 660.7 NDNS  |
| 10928 Female | 40 | 76.75  | 25.76 | 13.6 | 25  | 10.6853 | 2.0052 | 1101.5 NDNS |
| 10936 Male   | 59 | 87.5   | 25.76 | 14.6 | 81  | 17.3296 | 3.531  | 1343.3 NDNS |
| 10937 Male   | 63 | 82     | 27.27 | 13.8 | 97  | 24.4546 | 1.2647 | 2283.2 NDNS |
| 11001 Male   | 50 | 79.3   | 26.12 | 15.2 | 32  | 15.679  | 3.8739 | 1347.5 NDNS |
| 11002 Male   | 40 | 79.75  | 24.16 | 14.1 | 119 | 7.9932  | 1.564  | 855.7 NDNS  |
| 11004 Male   | 53 | 74.3   | 23.33 | 15.4 | 137 | 12.2881 | 2.2414 | 1121.5 NDNS |
| 11006 Female | 58 | 79.2   | 32.19 | 12.9 | 273 | 29.4573 | 1.8952 | 617.4 NDNS  |
| 11007 Male   | 41 | 65.4   | 22.52 | 15.5 | 94  | 12.901  | 2.5308 | 921.2 NDNS  |
| 11009 Male   | 21 | 54.25  | 20.32 | 15.4 | 86  | 6.1932  | 2.3741 | 495 NDNS    |
| 11010 Male   | 40 | 80.4   | 26.07 | 14.4 | 73  | 14.397  | 4.9096 | 1130.3 NDNS |
| 11016 Male   | 42 | 87.35  | 31.41 | 16.1 | 58  | 11.2679 | 2.3807 | 1113.3 NDNS |
| 11017 Male   | 62 | 69.05  | 26.56 | 15.1 | 194 | 6.6936  | 2.1727 | 458.8 NDNS  |
| 11022 Male   | 55 | 77.8   | 26.61 | 16.4 | 68  | 8.9991  | 3.028  | 941.5 NDNS  |
| 11029 Female | 30 | 53.65  | 19.95 | 14.6 | 36  | 9.2229  | 0.5219 | 554.7 NDNS  |
| 11103 Female | 25 | 103.9  | 36.27 | 12.9 | 42  | 8.9547  | 0      | 971.9 NDNS  |
| 11106 Female | 32 | 77.3   | 28.97 | 14   | 75  | 7.3515  | 2.2865 | 599.8 NDNS  |
| 11109 Female | 54 | 53.45  | 20.66 | 13.5 | 78  | 12.3853 | 2.4254 | 926.7 NDNS  |
| 11116 Male   | 25 | 109.55 | 35.05 | 15.6 | 169 | 20.7877 | 5.8142 | 1777 NDNS   |
| 11120 Male   | 45 | 88.4   | 25.8  | 16.5 | 100 | 14.4734 | 3.5841 | 1298.6 NDNS |
| 11132 Male   | 49 | 94.25  | 26.14 | 15.8 | 237 | 12.312  | 2.7133 | 737.9 NDNS  |
| 11133 Female | 63 | 71.55  | 24.83 | 12.4 | 36  | 12.0852 | 0.774  | 838.1 NDNS  |
| 11134 Female | 39 | 56.4   | 21.45 | 13.6 | 16  | 18.913  | 2.8966 | 781 NDNS    |
| 11207 Male   | 35 | 97.05  | 28.65 | 16.2 | 56  | 5.8032  | 0.2969 | 779 NDNS    |
| 11210 Male   | 19 | 55.3   | 20.24 | 16.6 | 45  | 5.0576  | 1.4488 | 255 NDNS    |
| 11212 Female | 39 | 70.05  | 24.75 | 12   | 14  | 1.6355  | 0.2828 | 170.8 NDNS  |
| 11216 Male   | 29 | 78.2   | 24.27 | 15.8 | 118 | 9.002   | 1.3995 | 886.5 NDNS  |
| 11221 Female | 61 | 80.7   | 37.04 | 12.6 | 81  | 10.398  | 1.4272 | 611.8 NDNS  |
| 11228 Female | 20 | 57.55  | 23.97 | 12   | 41  | 9.6196  | 0.6151 | 737.2 NDNS  |
| 11231 Female | 20 | 50.55  | 19.37 | 14   | 15  | 6.0187  | 0.1985 | 586.3 NDNS  |
| 11240 Female | 44 | 59.95  | 22.62 | 11.8 | 31  | 14.4487 | 2.7531 | 700.1 NDNS  |
| 11301 Female | 42 | 63.5   | 22.7  | 12.9 | 24  | 12.9349 | 2.8344 | 615.9 NDNS  |
| 11306 Male   | 59 | 87.9   | 29.89 | 17.3 | 93  | 12.2223 | 0.5245 | 925 NDNS    |
| 11330 Male   | 43 | 104.4  | 30.69 | 13.8 | 57  | 11.826  | 1.7824 | 1351.8 NDNS |
| 11417 Female | 34 | 57.7   | 22.61 | 13.7 | 45  | 5.2402  | 0.9353 | 387.7 NDNS  |
| 11421 Male   | 42 | 101.8  | 32.53 | 14.9 | 32  | 13.4256 | 2.4486 | 1559.2 NDNS |
| 11422 Female | 35 | 63.4   | 26.49 | 14.6 | 43  | 7.1532  | 1.9882 | 851.6 NDNS  |
| 11430 Female | 54 | 62.6   | 33.65 | 15.1 | 78  | 5.9817  | 0      | 882.7 NDNS  |
| 11510 Male   | 30 | 70.85  | 23.37 | 14.1 | 83  | 14.1052 | 2.8967 | 1609.5 NDNS |
| 11512 Male   | 56 | 95.3   | 30.01 | 14   | 26  | 18.0476 | 1.6236 | 1216.8 NDNS |
| 11516 Male   | 60 | 80.2   | 26.77 | 15.5 | 183 | 10.1349 | 2.0286 | 1208.8 NDNS |
| 11517 Female | 29 | 75.3   | 31.75 | 13.9 | 15  | 6.2281  | 0.779  | 669.4 NDNS  |
| 11522 Male   | 39 | 101.85 | 39    | 13.9 | 38  | 12.6115 | 3.3324 | 877.1 NDNS  |
| 11536 Female | 23 | 71.15  | 27.09 | 14.3 | 118 | 5.6698  | 1.7609 | 371 NDNS    |
| 11538 Female | 21 | 78.8   | 30.92 | 13.7 | 86  | 6.3285  | 0.9312 | 879.3 NDNS  |
| 11539 Female | 37 | 52.8   | 21    | 13.4 | 19  | 9.9404  | 0.6062 | 592.6 NDNS  |

|              |    |        |       |      |     |         |        |             |
|--------------|----|--------|-------|------|-----|---------|--------|-------------|
| 11607 Male   | 60 | 75.5   | 27.93 | 15.2 | 88  | 17.7091 | 4.3843 | 938.6 NDNS  |
| 11625 Male   | 36 | 84.2   | 26.37 | 14.1 | 99  | 16.7669 | 3.6849 | 1062.1 NDNS |
| 11628 Male   | 51 | 90.9   | 29.15 | 17.1 | 211 | 6.5318  | 1.0382 | 623.4 NDNS  |
| 11631 Male   | 49 | 83.85  | 26.46 | 15.1 | 108 | 16.0708 | 6.4725 | 841.4 NDNS  |
| 11632 Male   | 24 | 73.7   | 23.79 | 14.6 | 79  | 8.1609  | 3.2279 | 482.6 NDNS  |
| 11725 Male   | 56 | 85.85  | 30.97 | 13.3 | 22  | 10.4943 | 3.7947 | 837 NDNS    |
| 11735 Male   | 41 | 78.65  | 25.32 | 14.7 | 413 | 20.1502 | 6.6394 | 1029.6 NDNS |
| 11803 Male   | 40 | 93.45  | 30.74 | 16.1 | 91  | 13.0588 | 4.8045 | 1361.6 NDNS |
| 11804 Female | 62 | 65.65  | 25.77 | 13.1 | 66  | 8.5288  | 1.5375 | 742.8 NDNS  |
| 11807 Female | 40 | 64.6   | 26.16 | 13.6 | 37  | 7.2152  | 1.3713 | 697 NDNS    |
| 11810 Female | 34 | 74.35  | 27.01 | 13.6 | 39  | 11.2841 | 1.2118 | 537.9 NDNS  |
| 11814 Female | 59 | 65.5   | 26.56 | 12.9 | 46  | 8.8579  | 1.2595 | 1205.6 NDNS |
| 11817 Female | 48 | 60.7   | 23.83 | 13.3 | 22  | 5.8703  | 0.7092 | 1206.6 NDNS |
| 11819 Male   | 25 | 53     | 17.94 | 15.4 | 37  | 7.6231  | 2.6468 | 468.4 NDNS  |
| 11821 Male   | 41 | 62.4   | 21.59 | 16.1 | 173 | 13.9797 | 3.7701 | 1034.1 NDNS |
| 11908 Female | 63 | 62.4   | 24.13 | 13.2 | 39  | 10.0477 | 1.7822 | 1319.2 NDNS |
| 11915 Female | 24 | 76.95  | 27.23 | 13.4 | 14  | 4.5182  | 1.0509 | 492.2 NDNS  |
| 11921 Female | 59 | 82.55  | 32.05 | 12.1 | 75  | 8.416   | 0.8222 | 628.2 NDNS  |
| 11929 Female | 25 | 70.8   | 26.7  | 13.5 | 29  | 5.3368  | 0.4596 | 755 NDNS    |
| 11931 Female | 55 | 69.7   | 26.59 | 13.9 | 60  | 11.1735 | 0.6839 | 899.2 NDNS  |
| 11940 Female | 47 | 58.1   | 20.61 | 12.6 | 85  | 6.129   | 1.5581 | 533.8 NDNS  |
| 12004 Female | 53 | 72.15  | 26.7  | 14.1 | 77  | 11.9741 | 3.2797 | 607.1 NDNS  |
| 12005 Female | 45 | 54.3   | 20.01 | 12.8 | 22  | 7.4218  | 1.9265 | 838.8 NDNS  |
| 12006 Male   | 42 | 66.75  | 23.11 | 14.4 | 107 | 12.9198 | 3.1901 | 445.3 NDNS  |
| 12007 Male   | 39 | 72.5   | 25.15 | 16.2 | 80  | 5.4189  | 1.9181 | 576 NDNS    |
| 12011 Male   | 20 | 69.2   | 19.64 | 16.8 | 80  | 4.8438  | 2.1294 | 307.6 NDNS  |
| 12012 Female | 62 | 62.7   | 24.93 | 12   | 43  | 11.5453 | 1.5955 | 836.6 NDNS  |
| 12021 Female | 34 | 61.5   | 22.88 | 13.9 | 26  | 3.5212  | 0.8954 | 270.9 NDNS  |
| 12025 Female | 38 | 95.35  | 37.11 | 14.4 | 150 | 6.2709  | 0.4571 | 473.6 NDNS  |
| 12026 Female | 58 | 87.45  | 31.95 | 13.4 | 25  | 11.7057 | 2.9257 | 382.8 NDNS  |
| 12032 Male   | 46 | 76.6   | 26.32 | 15   | 608 | 10.7243 | 1.992  | 754.2 NDNS  |
| 12037 Female | 62 | 90.1   | 32.82 | 14.3 | 196 | 7.2044  | 0.8107 | 321.3 NDNS  |
| 12107 Male   | 41 | 80.6   | 24.19 | 16.1 | 107 | 6.1576  | 1.3444 | 1050.7 NDNS |
| 12121 Female | 53 | 66.95  | 26.57 | 14.8 | 53  | 11.6876 | 1.8514 | 838.4 NDNS  |
| 12122 Male   | 46 | 79.1   | 25.11 | 14.9 | 80  | 13.5011 | 3.8602 | 967.6 NDNS  |
| 12123 Female | 61 | 66.95  | 26.25 | 12   | 43  | 7.7022  | 0.5632 | 415.9 NDNS  |
| 12124 Male   | 58 | 80.9   | 27.33 | 15.7 | 42  | 11.4826 | 1.7439 | 1352.7 NDNS |
| 12127 Male   | 45 | 64     | 22.74 | 14.1 | 76  | 7.9778  | 2.2081 | 731.1 NDNS  |
| 12130 Female | 29 | 58     | 22.38 | 14.2 | 61  | 10.4717 | 3.3383 | 935.3 NDNS  |
| 12131 Male   | 32 | 85.3   | 29.12 | 16.4 | 106 | 15.7855 | 3.0939 | 1327.2 NDNS |
| 12132 Female | 24 | 103.85 | 34.88 | 14.1 | 65  | 12.4525 | 1.6712 | 458.1 NDNS  |
| 12139 Male   | 27 | 102.9  | 30.79 | 14.4 | 105 | 13.2547 | 3.5074 | 959.8 NDNS  |
| 12208 Female | 52 | 66.55  | 29.23 | 14.1 | 98  | 6.4601  | 0.4735 | 612 NDNS    |
| 12210 Female | 32 | 84.4   | 31.65 | 13.4 | 38  | 7.7469  | 0.5638 | 734.3 NDNS  |
| 12211 Female | 35 | 53.1   | 20.52 | 13.3 | 36  | 12.3243 | 2.4695 | 649.7 NDNS  |
| 12213 Female | 29 | 67.7   | 23.92 | 16.2 | 215 | 8.0362  | 1.627  | 614.9 NDNS  |
| 12214 Male   | 63 | 79.1   | 26.74 | 12.7 | 20  | 11.1822 | 2.886  | 860.6 NDNS  |
| 12215 Male   | 26 | 98.8   | 28.16 | 15.2 | 69  | 11.3636 | 3.6751 | 708.7 NDNS  |
| 12223 Male   | 34 | 71.1   | 23.81 | 14   | 67  | 20.0811 | 3.7116 | 1323.6 NDNS |
| 12227 Female | 37 | 53.2   | 20.26 | 12.6 | 13  | 2.7496  | 0.9162 | 254.3 NDNS  |
| 12228 Female | 62 | 66.5   | 24.19 | 13.6 | 43  | 10.0753 | 1.3887 | 982.9 NDNS  |
| 12303 Male   | 44 | 99.8   | 35.28 | 15   | 322 | 8.5595  | 2.954  | 671.2 NDNS  |
| 12306 Male   | 22 | 83.6   | 28.46 | 16.5 | 89  | 4.1952  | 1.4641 | 550.6 NDNS  |
| 12320 Female | 26 | 57.8   | 22.05 | 12.8 | 17  | 9.4942  | 1.9826 | 731.2 NDNS  |
| 12325 Male   | 27 | 88.75  | 29.62 | 14.6 | 119 | 14.2772 | 4.0872 | 987.5 NDNS  |
| 12331 Female | 38 | 59.4   | 22.56 | 14.9 | 28  | 10.6178 | 0.6746 | 941.9 NDNS  |
| 12332 Male   | 58 | 73.35  | 23.31 | 15.1 | 299 | 12.624  | 3.141  | 639.9 NDNS  |
| 12335 Female | 38 | 69     | 25.19 | 13.9 | 40  | 11.8087 | 4.1607 | 859.5 NDNS  |

|              |    |        |       |      |     |         |        |             |
|--------------|----|--------|-------|------|-----|---------|--------|-------------|
| 12338 Female | 31 | 65.8   | 21.87 | 13.3 | 58  | 10.825  | 1.8603 | 826.6 NDNS  |
| 12339 Male   | 38 | 83.2   | 23.05 | 15.7 | 90  | 15.8602 | 4.2537 | 1237.6 NDNS |
| 12403 Male   | 56 | 83.8   | 26.87 | 12.9 | 20  | 12.4745 | 2.9021 | 2288.3 NDNS |
| 12405 Male   | 62 | 97.85  | 30.56 | 14.4 | 236 | 19.6194 | 0.1171 | 824.5 NDNS  |
| 12408 Female | 43 | 75.3   | 27.33 | 12.7 | 27  | 12.3376 | 0.385  | 806 NDNS    |
| 12410 Female | 45 | 55.7   | 22.14 | 13.2 | 17  | 12.0945 | 2.7019 | 579.6 NDNS  |
| 12418 Female | 35 | 61.2   | 19.96 | 13.5 | 12  | 10.8442 | 0      | 1077.5 NDNS |
| 12427 Male   | 52 | 80.7   | 26.64 | 15.4 | 66  | 11.5187 | 0      | 894.2 NDNS  |
| 12440 Female | 53 | 90.9   | 33.33 | 12.1 | 38  | 13.4031 | 2.3982 | 722.9 NDNS  |
| 12501 Male   | 43 | 62.4   | 21.73 | 14.1 | 124 | 18.2061 | 2.2836 | 554 NDNS    |
| 12504 Male   | 52 | 93.4   | 30.96 | 15.6 | 71  | 12.6747 | 3.4506 | 989.2 NDNS  |
| 12506 Female | 25 | 65.4   | 23.27 | 13   | 61  | 5.6305  | 0      | 511.3 NDNS  |
| 12512 Female | 26 | 59.4   | 24.25 | 13.7 | 43  | 8.996   | 2.3017 | 822.6 NDNS  |
| 12522 Male   | 23 | 85.55  | 27.84 | 14.8 | 120 | 24.7036 | 1.7246 | 1055.9 NDNS |
| 12536 Female | 59 | 66.8   | 26.69 | 13.3 | 102 | 12.4172 | 1.2534 | 1149.8 NDNS |
| 12538 Male   | 26 | 52.8   | 18.9  | 16.9 | 199 | 10.9884 | 1.3171 | 563.2 NDNS  |
| 12609 Male   | 29 | 72.2   | 23.12 | 16   | 59  | 16.1219 | 2.612  | 1196.4 NDNS |
| 12611 Female | 38 | 66.45  | 25.21 | 12.9 | 37  | 9.2565  | 0.9806 | 1261.7 NDNS |
| 12616 Male   | 45 | 114.35 | 38.16 | 13.9 | 65  | 4.919   | 1.6474 | 746.5 NDNS  |
| 12618 Female | 30 | 76.6   | 28.81 | 13.4 | 18  | 10.1241 | 1.6213 | 646 NDNS    |
| 12625 Female | 26 | 110.25 | 43.94 | 16.1 | 119 | 7.4436  | 1.4525 | 220 NDNS    |
| 12628 Male   | 48 | 83.5   | 27.98 | 15.7 | 91  | 5.16    | 0.8857 | 588.9 NDNS  |
| 12629 Female | 42 | 68.2   | 23.85 | 14.3 | 63  | 10.5481 | 1.5444 | 799.9 NDNS  |
| 12704 Female | 43 | 65.55  | 22    | 14.9 | 72  | 10.9973 | 1.9244 | 781.5 NDNS  |
| 12710 Female | 30 | 56.5   | 19.97 | 12.9 | 31  | 6.3688  | 0      | 829.6 NDNS  |
| 12711 Female | 30 | 86.1   | 29.09 | 14.3 | 37  | 14.5341 | 4.0477 | 1089.2 NDNS |
| 12714 Male   | 52 | 90.85  | 31.57 | 14.6 | 262 | 12.381  | 0.5855 | 685.9 NDNS  |
| 12721 Female | 56 | 63.3   | 24.53 | 12.7 | 51  | 15.1091 | 0.8126 | 1017 NDNS   |
| 12730 Female | 56 | 65.1   | 26.38 | 15.5 | 73  | 11.1512 | 0.4582 | 943.1 NDNS  |
| 12731 Female | 56 | 71.25  | 26.56 | 13.1 | 37  | 15.2335 | 2.0979 | 777.2 NDNS  |
| 12732 Female | 60 | 63.65  | 24.36 | 13.2 | 160 | 8.1661  | 1.4529 | 691.4 NDNS  |
| 12738 Male   | 46 | 77.15  | 24.15 | 15.5 | 87  | 13.8669 | 3.048  | 825.4 NDNS  |
| 12802 Female | 31 | 108.9  | 41.19 | 13.1 | 23  | 7.0158  | 2.3756 | 693.2 NDNS  |
| 12803 Female | 35 | 79.7   | 34.25 | 12.9 | 63  | 10.8751 | 0.12   | 816.1 NDNS  |
| 12809 Female | 31 | 59.3   | 20.84 | 12.6 | 44  | 5.8776  | 1.6415 | 490.3 NDNS  |
| 12823 Male   | 39 | 84.6   | 25.29 | 16   | 24  | 19.9571 | 1.3593 | 1601.4 NDNS |
| 12829 Female | 38 | 103.8  | 33.76 | 12.9 | 38  | 14.2365 | 0.1302 | 1384.4 NDNS |
| 12839 Female | 53 | 66     | 26.98 | 13   | 44  | 3.2061  | 0.1    | 443.1 NDNS  |
| 12907 Male   | 54 | 65.8   | 22.25 | 12.6 | 24  | 7.5081  | 2.3451 | 831.6 NDNS  |
| 12908 Female | 38 | 58.35  | 24.8  | 12.6 | 19  | 6.4675  | 1.6576 | 667.1 NDNS  |
| 12923 Male   | 44 | 72.4   | 23.63 | 16.2 | 50  | 7.235   | 1.8643 | 945.3 NDNS  |
| 12926 Female | 53 | 58.6   | 22.47 | 13.7 | 75  | 13.6395 | 4.0287 | 780.9 NDNS  |
| 12930 Female | 48 | 89.05  | 32.65 | 13.5 | 46  | 9.4282  | 0.8825 | 1322.3 NDNS |
| 12932 Male   | 56 | 99.55  | 31.12 | 15   | 49  | 8.9275  | 1.0241 | 794.5 NDNS  |
| 12934 Female | 28 | 57.55  | 20.82 | 15.1 | 41  | 8.0408  | 0      | 1215.6 NDNS |
| 13008 Male   | 53 | 55.1   | 19.83 | 15.9 | 152 | 15.165  | 7.1573 | 1446.8 NDNS |
| 13009 Female | 31 | 70.4   | 28.09 | 14.3 | 112 | 5.0734  | 0.598  | 708.8 NDNS  |
| 13014 Female | 33 | 69     | 26.26 | 13.3 | 50  | 11.1598 | 0.9636 | 1065.7 NDNS |
| 13015 Female | 28 | 57.9   | 22.28 | 13.2 | 57  | 6.8144  | 1.0085 | 1178.7 NDNS |
| 13020 Male   | 43 | 98.3   | 29.97 | 16.4 | 240 | 12.6026 | 2.7252 | 966.7 NDNS  |
| 13028 Male   | 64 | 84     | 28.31 | 16.1 | 185 | 5.4104  | 1.5432 | 675 NDNS    |
| 13103 Male   | 39 | 81.8   | 25.59 | 14.2 | 15  | 16.5542 | 2.1517 | 1454.2 NDNS |
| 13106 Female | 35 | 64.5   | 21.93 | 15.3 | 266 | 17.2603 | 1.8979 | 1420.9 NDNS |
| 13108 Female | 59 | 75.9   | 28.69 | 13.7 | 71  | 15.2441 | 3.0077 | 1070.2 NDNS |
| 13110 Male   | 22 | 105    | 30.76 | 16   | 77  | 14.9333 | 1.6458 | 1402.5 NDNS |
| 13114 Male   | 63 | 84.8   | 28.14 | 15.1 | 114 | 9.2912  | 3.2286 | 443.4 NDNS  |
| 13118 Female | 55 | 79.7   | 28.2  | 14.1 | 47  | 14.5358 | 0      | 1570.7 NDNS |
| 13127 Female | 57 | 57.25  | 21.65 | 14.6 | 16  | 8.8529  | 1.2862 | 849.8 NDNS  |

|              |    |       |       |      |     |         |        |             |
|--------------|----|-------|-------|------|-----|---------|--------|-------------|
| 13133 Female | 47 | 73.7  | 28.33 | 12.9 | 52  | 11.3684 | 0.9966 | 1033.9 NDNS |
| 13135 Male   | 44 | 66.2  | 21.44 | 15.1 | 69  | 10.9181 | 0.1685 | 764.8 NDNS  |
| 13136 Male   | 62 | 84.1  | 25.94 | 15.4 | 42  | 24.1418 | 1.8591 | 1121.4 NDNS |
| 13139 Male   | 45 | 80.1  | 26.29 | 17   | 67  | 20.1433 | 0.3645 | 1232.1 NDNS |
| 13211 Male   | 45 | 90.45 | 27.56 | 14.8 | 110 | 19.8847 | 2.008  | 859.7 NDNS  |
| 13215 Female | 25 | 54.45 | 22.68 | 11.5 | 10  | 5.0207  | 0.3335 | 579.6 NDNS  |
| 13223 Female | 29 | 58.85 | 20.41 | 13.1 | 107 | 11.245  | 3.3079 | 1054.4 NDNS |
| 13228 Female | 47 | 60.1  | 22.84 | 13.8 | 13  | 11.9526 | 1.8725 | 1000 NDNS   |
| 13240 Male   | 55 | 85.95 | 27.37 | 15.8 | 120 | 11.8134 | 1.3038 | 1299.4 NDNS |
| 13302 Female | 58 | 71.9  | 27.03 | 15.3 | 59  | 8.9811  | 1.6226 | 475 NDNS    |
| 13303 Female | 39 | 66.7  | 22.92 | 13.8 | 19  | 9.5065  | 2.4262 | 990 NDNS    |
| 13306 Female | 53 | 78.2  | 28.85 | 13.3 | 154 | 7.0448  | 1.4172 | 692.8 NDNS  |
| 13307 Female | 64 | 66.25 | 23.51 | 14.6 | 53  | 8.8874  | 0.1    | 823.6 NDNS  |
| 13313 Male   | 50 | 96.3  | 32.95 | 14.7 | 102 | 20.2137 | 3.3276 | 1328.6 NDNS |
| 13315 Male   | 39 | 82.6  | 26.26 | 14.1 | 37  | 13.4296 | 1.5243 | 1213.6 NDNS |
| 13320 Female | 41 | 67.3  | 24.62 | 13.8 | 55  | 13.7131 | 1.166  | 1119.5 NDNS |
| 13324 Male   | 30 | 79.5  | 27.88 | 14.5 | 170 | 14.1399 | 2.2014 | 1246.5 NDNS |
| 13327 Male   | 55 | 111.8 | 35.53 | 16.3 | 506 | 13.9543 | 4.8199 | 1100.7 NDNS |
| 13405 Female | 35 | 87.5  | 33.3  | 13.7 | 35  | 10.0583 | 1.759  | 697.3 NDNS  |
| 13408 Male   | 42 | 85    | 30.03 | 16.5 | 18  | 4.4219  | 0.9738 | 325.5 NDNS  |
| 13417 Male   | 31 | 66.9  | 21.15 | 16.8 | 175 | 10.1729 | 1.1517 | 1107 NDNS   |
| 13423 Male   | 57 | 88    | 31.8  | 15.8 | 183 | 20.6574 | 4.3248 | 1067.4 NDNS |
| 13503 Female | 34 | 69.65 | 28.18 | 12.4 | 5   | 13.5819 | 2.2742 | 1254.7 NDNS |
| 13504 Male   | 33 | 81.15 | 28.18 | 15.2 | 55  | 13.5019 | 0.9562 | 1316.1 NDNS |
| 13508 Male   | 19 | 74.6  | 23.88 | 16   | 19  | 12.0177 | 0.8843 | 1417.1 NDNS |
| 13509 Male   | 44 | 90.45 | 31.1  | 15.1 | 92  | 10.1133 | 2.8477 | 1063.7 NDNS |
| 13510 Male   | 24 | 72.9  | 25    | 15.2 | 53  | 11.4975 | 1.1171 | 1231.1 NDNS |
| 13514 Female | 45 | 68.3  | 26.45 | 13.7 | 15  | 6.6104  | 1.956  | 476.2 NDNS  |
| 13517 Male   | 39 | 77.2  | 25.51 | 15.3 | 26  | 14.9878 | 2.7901 | 1145.7 NDNS |
| 13524 Female | 23 | 59.7  | 21.23 | 13.2 | 32  | 23.4526 | 2.281  | 1549.8 NDNS |
| 13525 Male   | 34 | 99.95 | 30.53 | 14.8 | 81  | 27.7032 | 4.392  | 1189.1 NDNS |
| 13527 Male   | 29 | 90.8  | 28.79 | 15.1 | 30  | 11.7968 | 4.7347 | 777.8 NDNS  |
| 13536 Female | 47 | 73.6  | 25.32 | 12.5 | 34  | 12.8633 | 1.333  | 951.1 NDNS  |
| 13539 Male   | 61 | 72.6  | 24.26 | 16.2 | 176 | 8.4653  | 1.3762 | 956.2 NDNS  |
| 13618 Female | 22 | 53.5  | 20.36 | 11   | 8   | 7.4567  | 1.2479 | 905.8 NDNS  |
| 13629 Female | 39 | 50.75 | 20.58 | 13.8 | 59  | 7.2476  | 1.3157 | 827.3 NDNS  |
| 13710 Female | 19 | 42.8  | 15.89 | 13.7 | 59  | 5.3001  | 2.0074 | 463.6 NDNS  |
| 13813 Male   | 59 | 117.9 | 35.26 | 14.5 | 170 | 11.1161 | 1.2416 | 1021.9 NDNS |
| 13824 Female | 56 | 67.2  | 26.87 | 13   | 113 | 10.851  | 1.2693 | 1088.3 NDNS |
| 13903 Female | 45 | 71.05 | 24.69 | 12.8 | 36  | 12.5647 | 1.7723 | 1138.4 NDNS |
| 13904 Female | 63 | 45.35 | 18.15 | 15.5 | 13  | 3.3414  | 0.6538 | 164.4 NDNS  |
| 13907 Female | 36 | 57.65 | 22.7  | 15.6 | 109 | 15.1831 | 3.5706 | 462.7 NDNS  |
| 13937 Female | 38 | 51.2  | 20.67 | 12.8 | 116 | 9.2939  | 1.3291 | 740 NDNS    |
| 13939 Female | 35 | 50.1  | 22.12 | 14.6 | 44  | 10.2088 | 1.519  | 625.2 NDNS  |
| 14006 Female | 46 | 71.8  | 25.68 | 13.4 | 73  | 10.1394 | 2.2782 | 733.6 NDNS  |
| 14101 Female | 51 | 72.8  | 29.63 | 13.6 | 28  | 17.8188 | 3.0595 | 888.4 NDNS  |
| 14102 Male   | 48 | 88.9  | 29.76 | 15.7 | 624 | 10.3906 | 2.8461 | 922.5 NDNS  |
| 14105 Male   | 36 | 90.1  | 27.72 | 15.6 | 15  | 22.9346 | 3.5453 | 1555.4 NDNS |
| 14106 Female | 63 | 79.2  | 32.38 | 13   | 180 | 10.7174 | 1.9738 | 907.2 NDNS  |
| 14107 Male   | 54 | 95.1  | 27.4  | 14.8 | 23  | 6.5946  | 1.2525 | 743.4 NDNS  |
| 14112 Female | 64 | 65.2  | 25.11 | 12   | 24  | 10.0401 | 4.005  | 835.6 NDNS  |
| 14116 Male   | 41 | 75.9  | 23.48 | 15.5 | 87  | 10.698  | 2.4975 | 981.8 NDNS  |
| 14117 Female | 37 | 70.9  | 26.97 | 13.8 | 51  | 4.4197  | 1.3277 | 875.2 NDNS  |
| 14122 Male   | 56 | 86.6  | 26.33 | 12.8 | 211 | 13.2775 | 1.918  | 1243.8 NDNS |
| 14127 Female | 39 | 62    | 22.79 | 15.2 | 58  | 5.1556  | 0.657  | 499.9 NDNS  |
| 14306 Female | 52 | 60.2  | 24.24 | 12.2 | 18  | 5.824   | 1.736  | 975.8 NDNS  |
| 14310 Female | 41 | 47.9  | 19.89 | 13.9 | 39  | 11.924  | 0.7601 | 1019.3 NDNS |
| 14313 Female | 54 | 86.15 | 32.19 | 13.5 | 121 | 12.5928 | 0.5066 | 551.7 NDNS  |



|              |    |       |       |      |     |         |        |             |
|--------------|----|-------|-------|------|-----|---------|--------|-------------|
| 14315 Male   | 19 | 49.6  | 16.9  | 15.3 | 27  | 6.183   | 1.1446 | 668 NDNS    |
| 14317 Male   | 54 | 121.6 | 37.36 | 14.4 | 247 | 12.2227 | 3.6017 | 996.6 NDNS  |
| 14328 Female | 48 | 77.5  | 30.81 | 14.6 | 28  | 9.4955  | 2.2046 | 559.3 NDNS  |
| 14332 Female | 62 | 49.3  | 21.74 | 13   | 10  | 12.322  | 0.4876 | 859.2 NDNS  |
| 14336 Female | 28 | 53.3  | 20.67 | 12.8 | 63  | 8.906   | 0.3856 | 909.3 NDNS  |
| 14340 Female | 55 | 73.3  | 27.09 | 14   | 52  | 15.4607 | 1.2807 | 1109.7 NDNS |
| 14404 Male   | 62 | 63.25 | 20.05 | 15.4 | 71  | 20.8709 | 1.867  | 1210.4 NDNS |
| 14406 Male   | 53 | 86.1  | 26.56 | 17.4 | 213 | 18.7232 | 2.1959 | 1783.4 NDNS |
| 14412 Female | 48 | 75.75 | 30.61 | 13.3 | 147 | 7.947   | 0.9958 | 689.2 NDNS  |
| 14416 Male   | 64 | 103.3 | 30.93 | 16.4 | 110 | 12.4635 | 3.4651 | 1061.8 NDNS |
| 14420 Female | 61 | 63.85 | 27.89 | 14.7 | 257 | 6.9421  | 0.9314 | 448.5 NDNS  |
| 14435 Female | 31 | 55.7  | 22.27 | 13.5 | 16  | 6.5442  | 1.3414 | 516.1 NDNS  |
| 14506 Male   | 39 | 81.95 | 26.76 | 13.8 | 107 | 21.0866 | 1.9795 | 1511.8 NDNS |
| 14509 Female | 31 | 71.6  | 26.88 | 12.9 | 145 | 3.9613  | 0.8265 | 359.7 NDNS  |
| 14511 Female | 32 | 67.1  | 23.55 | 12.8 | 45  | 13.9767 | 2.3957 | 857.6 NDNS  |
| 14514 Female | 43 | 55.75 | 21.03 | 12.8 | 13  | 10.0091 | 3.2836 | 732.8 NDNS  |
| 14515 Female | 35 | 112.5 | 44.03 | 13.3 | 27  | 4.5311  | 1.9773 | 430.3 NDNS  |
| 14528 Female | 35 | 105.7 | 41.37 | 13.5 | 64  | 7.3166  | 0.3465 | 946.2 NDNS  |
| 14529 Male   | 39 | 80.45 | 27.01 | 16.2 | 48  | 11.5884 | 0.9478 | 749.9 NDNS  |
| 14534 Male   | 48 | 90.6  | 29.22 | 16.3 | 90  | 13.5826 | 2.0336 | 1377.5 NDNS |
| 14536 Female | 45 | 80.7  | 30.37 | 13.2 | 18  | 14.4029 | 0      | 1108.6 NDNS |
| 14537 Male   | 44 | 107.6 | 36.86 | 16.9 | 324 | 15.2256 | 0.8855 | 1090.9 NDNS |
| 14539 Male   | 32 | 99.25 | 34.4  | 14.4 | 123 | 13.3112 | 3.792  | 1014.2 NDNS |
| 14601 Male   | 60 | 96.7  | 26.48 | 14.3 | 72  | 13.0347 | 2.4615 | 1148.7 NDNS |
| 14605 Female | 34 | 70.45 | 27.78 | 14.5 | 31  | 5.7718  | 1.9667 | 498.2 NDNS  |
| 14610 Female | 32 | 67.4  | 25.7  | 13.4 | 47  | 10.0152 | 1.7957 | 582.7 NDNS  |
| 14613 Female | 55 | 58.5  | 23.76 | 14.3 | 99  | 7.5097  | 4.6222 | 325.4 NDNS  |
| 14618 Female | 51 | 60.2  | 22.81 | 13.2 | 34  | 14.4434 | 0.6336 | 1288.8 NDNS |
| 14622 Female | 60 | 66.4  | 27.06 | 10.4 | 5   | 10.2263 | 1.6153 | 955.6 NDNS  |
| 14623 Female | 44 | 52.25 | 19.43 | 14.1 | 48  | 9.9724  | 2.0565 | 581.4 NDNS  |
| 14624 Male   | 34 | 90.05 | 28.23 | 15   | 191 | 12.7532 | 5.1071 | 1060.6 NDNS |
| 14626 Male   | 50 | 73    | 24.07 | 15.6 | 37  | 13.5672 | 2.0778 | 855.5 NDNS  |
| 14627 Male   | 43 | 98.95 | 30.07 | 16.3 | 108 | 15.2299 | 2.1221 | 1314.1 NDNS |
| 14630 Female | 33 | 64.5  | 23.97 | 12.4 | 27  | 9.3661  | 0.3387 | 576.1 NDNS  |
| 14714 Female | 55 | 76.7  | 28.97 | 15.2 | 114 | 8.7958  | 2.8767 | 437 NDNS    |
| 14716 Female | 44 | 79.6  | 27.51 | 14.2 | 21  | 8.253   | 2.0427 | 1012.1 NDNS |
| 14724 Male   | 62 | 99.45 | 33.99 | 17.1 | 222 | 4.176   | 1.3591 | 225.9 NDNS  |
| 14725 Male   | 20 | 62.9  | 20.41 | 16.9 | 129 | 8.8898  | 1.8432 | 1116.5 NDNS |
| 14730 Male   | 44 | 81.6  | 27.26 | 15   | 202 | 21.7363 | 1.1374 | 849.9 NDNS  |
| 14802 Male   | 41 | 98.7  | 33.02 | 14.4 | 6   | 11.5368 | 2.7552 | 994.3 NDNS  |
| 14803 Female | 29 | 58.05 | 23.67 | 12.5 | 45  | 4.8459  | 1.4053 | 294.1 NDNS  |
| 14805 Male   | 28 | 74.2  | 21.26 | 14.4 | 49  | 7.5988  | 2.4061 | 754.8 NDNS  |
| 14807 Male   | 41 | 91.3  | 28.54 | 14.7 | 95  | 6.7463  | 2.0784 | 971.2 NDNS  |
| 14808 Male   | 44 | 92.75 | 29.54 | 14   | 226 | 6.7448  | 1.2184 | 413.2 NDNS  |
| 14810 Male   | 35 | 69.55 | 23.33 | 14.3 | 134 | 6.8718  | 2.8834 | 548.6 NDNS  |
| 14816 Male   | 24 | 77    | 26.21 | 15.7 | 58  | 10.4826 | 0.652  | 1230.2 NDNS |
| 14818 Male   | 28 | 101.9 | 29.87 | 15.5 | 73  | 13.2659 | 2.9919 | 1489.7 NDNS |
| 14823 Male   | 21 | 61.6  | 18.46 | 13   | 93  | 16.046  | 4.006  | 1048.9 NDNS |
| 14834 Male   | 31 | 96.4  | 29.9  | 15.6 | 70  | 11.8156 | 3.5406 | 836.4 NDNS  |
| 14910 Female | 29 | 67.2  | 23.78 | 12.8 | 42  | 11.787  | 1.457  | 984.6 NDNS  |
| 14913 Female | 34 | 78.6  | 32.63 | 13.1 | 29  | 10.5503 | 1.1667 | 799.6 NDNS  |
| 14914 Male   | 57 | 91.8  | 34.94 | 14   | 51  | 18.538  | 6.6211 | 1214.9 NDNS |
| 14918 Female | 57 | 59.45 | 21.21 | 13.2 | 63  | 11.9341 | 1.3626 | 769.5 NDNS  |
| 14922 Female | 37 | 74.05 | 28.23 | 13.3 | 11  | 5.716   | 0.3516 | 1169.1 NDNS |
| 14932 Female | 44 | 81.2  | 30.38 | 10.8 | 9   | 9.7244  | 1.0463 | 1074.5 NDNS |
| 15014 Male   | 33 | 90.35 | 30.43 | 16.2 | 235 | 17.8786 | 2.8743 | 1442 NDNS   |
| 15016 Female | 31 | 76.35 | 30.11 | 15   | 80  | 6.6402  | 2.2692 | 546.1 NDNS  |
| 15020 Male   | 34 | 69.55 | 26.7  | 15.2 | 93  | 6.5178  | 2.5395 | 410.3 NDNS  |

|              |    |        |       |      |     |         |        |             |
|--------------|----|--------|-------|------|-----|---------|--------|-------------|
| 15027 Male   | 50 | 68.15  | 21.19 | 17.3 | 214 | 11.4548 | 3.7864 | 673.7 NDNS  |
| 15107 Male   | 35 | 95.85  | 29.96 | 14.8 | 103 | 14.8144 | 2.5496 | 1376.5 NDNS |
| 15108 Male   | 32 | 67.8   | 22.97 | 15.5 | 64  | 7.7138  | 1.8018 | 858.1 NDNS  |
| 15110 Female | 59 | 78.1   | 30.99 | 13.4 | 161 | 5.1319  | 0.5901 | 724.1 NDNS  |
| 15112 Male   | 30 | 97.45  | 31.8  | 15.2 | 45  | 22.2299 | 3.1823 | 2284.6 NDNS |
| 15113 Female | 32 | 86.7   | 30.04 | 14.6 | 57  | 8.8613  | 0.9634 | 1095.9 NDNS |
| 15114 Male   | 48 | 83.35  | 28.62 | 15.4 | 121 | 10.5949 | 2.2757 | 756.8 NDNS  |
| 15117 Male   | 35 | 94.45  | 30.16 | 14.2 | 103 | 14.9562 | 3.0481 | 1975.5 NDNS |
| 15118 Female | 53 | 68.7   | 25.36 | 14.1 | 64  | 13.8557 | 3.6976 | 864.2 NDNS  |
| 15121 Male   | 51 | 81.2   | 27.26 | 15.3 | 38  | 22.3326 | 1.9395 | 1455.8 NDNS |
| 15127 Male   | 49 | 65     | 20.39 | 15.5 | 48  | 19.7524 | 0.8748 | 1327.3 NDNS |
| 15130 Female | 53 | 52     | 20.62 | 15.7 | 126 | 8.4291  | 1.8502 | 938.1 NDNS  |
| 15131 Male   | 40 | 84.1   | 25.22 | 14.4 | 105 | 16.5328 | 3.9375 | 922.6 NDNS  |
| 15133 Male   | 53 | 83.7   | 30.73 | 13.5 | 84  | 9.4511  | 1.2667 | 1108.6 NDNS |
| 15136 Male   | 50 | 85.7   | 27.39 | 14.8 | 49  | 16.1701 | 0      | 865.7 NDNS  |
| 15204 Male   | 64 | 72.05  | 25.39 | 15   | 124 | 17.5459 | 1.2745 | 1088.5 NDNS |
| 15208 Male   | 56 | 76.1   | 24.95 | 15.4 | 57  | 15.6065 | 3.4828 | 999 NDNS    |
| 15211 Female | 45 | 86.15  | 28.83 | 13.7 | 12  | 7.6109  | 2.4386 | 967.4 NDNS  |
| 15213 Female | 22 | 81.35  | 26.69 | 13   | 29  | 7.362   | 2.609  | 586.3 NDNS  |
| 15226 Female | 52 | 58.35  | 23.05 | 12.8 | 21  | 7.3095  | 0.3735 | 936.8 NDNS  |
| 15302 Female | 31 | 66.7   | 26.38 | 15.3 | 23  | 5.5669  | 1.1436 | 609.9 NDNS  |
| 15303 Female | 24 | 83.65  | 28.46 | 14.5 | 65  | 17.9642 | 3.0446 | 992.4 NDNS  |
| 15306 Female | 62 | 53.6   | 22.2  | 13.8 | 93  | 5.9406  | 1.0002 | 696.5 NDNS  |
| 15312 Female | 36 | 63.5   | 23.3  | 14.1 | 43  | 11.0315 | 1.7634 | 590.5 NDNS  |
| 15317 Male   | 31 | 84.1   | 24.57 | 15.5 | 117 | 9.5231  | 3.5711 | 1045 NDNS   |
| 15318 Male   | 21 | 89.55  | 30.13 | 15   | 179 | 14.6653 | 5.522  | 806.3 NDNS  |
| 15332 Female | 35 | 60.9   | 22.87 | 13.4 | 15  | 12.6154 | 1.7931 | 863.3 NDNS  |
| 15336 Female | 33 | 74.1   | 26.67 | 14.5 | 95  | 4.0195  | 2.2304 | 362.9 NDNS  |
| 15404 Male   | 27 | 84.65  | 25.95 | 14.4 | 89  | 13.6343 | 4.0564 | 1001.3 NDNS |
| 15405 Female | 31 | 55     | 21.96 | 11.8 | 25  | 13.5076 | 0      | 953.1 NDNS  |
| 15407 Male   | 36 | 81     | 24.29 | 13.7 | 87  | 16.0042 | 2.36   | 1074.5 NDNS |
| 15415 Female | 43 | 58.1   | 21.83 | 12.5 | 15  | 12.4501 | 1.8481 | 970.9 NDNS  |
| 15421 Male   | 29 | 84.9   | 24.37 | 16.1 | 68  | 19.8474 | 1.4246 | 872.6 NDNS  |
| 15422 Male   | 52 | 73.85  | 24.83 | 13.8 | 141 | 18.6414 | 2.5559 | 1197 NDNS   |
| 15423 Male   | 35 | 64.75  | 21    | 14.7 | 53  | 14.269  | 2.7136 | 1670.3 NDNS |
| 15501 Male   | 34 | 61.6   | 17.63 | 15.6 | 88  | 10.126  | 1.8424 | 684 NDNS    |
| 15502 Female | 46 | 56.4   | 21.5  | 10   | 13  | 9.0494  | 2.588  | 996.8 NDNS  |
| 15504 Male   | 50 | 107    | 31.4  | 15.6 | 148 | 13.6068 | 4.0385 | 855.2 NDNS  |
| 15514 Male   | 31 | 94.9   | 33.62 | 14.7 | 30  | 10.5521 | 2.4603 | 514.9 NDNS  |
| 15515 Male   | 44 | 78.4   | 28.8  | 16.1 | 162 | 12.9403 | 2.3947 | 1199.7 NDNS |
| 15518 Male   | 38 | 89.7   | 27.65 | 15.4 | 162 | 20.1535 | 6.9569 | 1730.8 NDNS |
| 15533 Male   | 45 | 90.3   | 26.47 | 13.8 | 134 | 15.0355 | 5.7787 | 983.5 NDNS  |
| 15601 Female | 40 | 60.5   | 22.98 | 12.7 | 18  | 10.9803 | 0.5303 | 805.1 NDNS  |
| 15602 Female | 56 | 57.9   | 24.07 | 12.8 | 46  | 8.9614  | 0.6948 | 911.9 NDNS  |
| 15616 Male   | 36 | 67.5   | 23.89 | 12.7 | 62  | 9.527   | 3.3215 | 1130.3 NDNS |
| 15621 Female | 31 | 54.85  | 19.19 | 11.9 | 65  | 9.5467  | 1.8363 | 798.1 NDNS  |
| 15632 Female | 60 | 68.35  | 23.14 | 13.9 | 106 | 12.1303 | 1.2137 | 981.3 NDNS  |
| 15638 Female | 20 | 57.85  | 19.92 | 11.6 | 19  | 9.9023  | 1.7315 | 673.9 NDNS  |
| 15640 Female | 34 | 71.8   | 27.79 | 11.9 | 5   | 7.9259  | 0      | 750.3 NDNS  |
| 15709 Male   | 30 | 90.45  | 26.44 | 15.4 | 122 | 13.6763 | 3.2862 | 851.1 NDNS  |
| 15710 Male   | 23 | 63.4   | 20.61 | 14.1 | 77  | 10.4097 | 2.4651 | 895.5 NDNS  |
| 15720 Male   | 39 | 86.25  | 26.3  | 14.5 | 82  | 17.2875 | 1.7217 | 1201.1 NDNS |
| 15728 Male   | 25 | 103.25 | 32.1  | 16.7 | 190 | 12.4942 | 1.9469 | 934.5 NDNS  |
| 15815 Male   | 27 | 99.5   | 30.01 | 14.7 | 49  | 7.062   | 1.1849 | 707.9 NDNS  |
| 15816 Male   | 31 | 80.65  | 25.37 | 16.1 | 39  | 16.5803 | 2.5896 | 1094.8 NDNS |
| 15821 Female | 36 | 56.7   | 24.05 | 12.9 | 69  | 5.7455  | 1.2136 | 773.5 NDNS  |
| 15824 Female | 60 | 60.5   | 25.88 | 13.6 | 96  | 8.1297  | 1.2467 | 443.8 NDNS  |
| 15827 Male   | 57 | 95.5   | 32.04 |      | 133 | 13.3119 | 1.9025 | 1006.3 NDNS |

|              |    |        |       |      |     |         |        |             |
|--------------|----|--------|-------|------|-----|---------|--------|-------------|
| 15917 Male   | 56 | 74.55  | 23.73 | 14.8 | 162 | 12.2718 | 0.2349 | 990.5 NDNS  |
| 15938 Female | 35 | 47.1   | 20.29 | 13.5 | 35  | 10.1746 | 1.1778 | 614.1 NDNS  |
| 15940 Male   | 35 | 90.2   | 29.59 | 15.3 | 50  | 6.6614  | 0.7438 | 808.3 NDNS  |
| 16007 Female | 45 | 83.2   | 27.11 | 11.5 | 14  | 11.4154 | 1.9252 | 1173.7 NDNS |
| 16013 Male   | 45 | 81.9   | 24.39 | 14.1 | 49  | 16.3005 | 1.8738 | 1608.2 NDNS |
| 16015 Female | 43 | 66.3   | 25.55 | 12   | 18  | 10.9601 | 2.3301 | 833.4 NDNS  |
| 16017 Male   | 24 | 77.4   | 23.84 | 14.5 | 17  | 9.5075  | 1.9632 | 963.7 NDNS  |
| 16021 Female | 29 | 62.3   | 23.53 | 14   | 25  | 5.2958  | 1.758  | 319.7 NDNS  |
| 16037 Female | 63 | 69.2   | 27.83 | 13.7 | 126 | 9.2927  | 1.7163 | 573.2 NDNS  |
| 16040 Male   | 40 | 91.8   | 27.94 | 14.8 | 118 | 9.5193  | 1.8051 | 783.2 NDNS  |
| 16113 Female | 29 | 65.1   | 25.59 | 11.8 | 16  | 12.0092 | 0.3862 | 498.5 NDNS  |
| 16213 Female | 24 | 56.15  | 21.04 | 12.9 | 76  | 9.2235  | 0.446  | 989.6 NDNS  |
| 16224 Male   | 54 | 98.7   | 35.52 | 14.3 | 235 | 3.5023  | 0.89   | 263.4 NDNS  |
| 16301 Male   | 24 | 89.65  | 26.96 | 16.1 | 178 | 14.1597 | 2.3709 | 1272 NDNS   |
| 16303 Female | 26 | 75.7   | 26.76 | 12.2 | 17  | 5.4122  | 0.9236 | 671 NDNS    |
| 16309 Male   | 51 | 104.2  | 32.67 | 14.2 | 111 | 21.9034 | 7.4459 | 1604.7 NDNS |
| 16311 Female | 36 | 58.45  | 21.28 | 14.3 | 31  | 14.5331 | 1.5262 | 1306 NDNS   |
| 16313 Female | 45 | 76.65  | 31.74 | 14.4 | 56  | 8.7223  | 0.5394 | 582.2 NDNS  |
| 16319 Male   | 29 | 81.4   | 29.4  | 13.2 | 141 | 7.8782  | 3.3979 | 342.1 NDNS  |
| 16327 Female | 32 | 73.75  | 29.88 | 13.2 | 14  | 7.8719  | 1.2387 | 963.7 NDNS  |
| 16329 Female | 29 | 56.25  | 20.45 | 13   | 26  | 9.0022  | 1.0427 | 823.3 NDNS  |
| 16332 Female | 60 | 62.45  | 26.08 | 13.2 | 29  | 14.9338 | 0.5631 | 1428.8 NDNS |
| 16333 Female | 42 | 79.15  | 29.21 | 12.4 | 31  | 7.096   | 2.4617 | 783.8 NDNS  |
| 16334 Female | 23 | 78.2   | 29.18 | 14   | 83  | 12.4512 | 1.2347 | 913.3 NDNS  |
| 16414 Male   | 49 | 79.4   | 27.98 | 14.5 | 297 | 13.0088 | 2.3447 | 727.6 NDNS  |
| 16423 Female | 36 | 66.2   | 25.26 | 14.2 | 22  | 4.7641  | 0.721  | 652.5 NDNS  |
| 16424 Female | 36 | 47.7   | 17.92 | 10.6 | 10  | 5.6323  | 1.218  | 421.1 NDNS  |
| 16425 Female | 42 | 84.2   | 32.28 | 15.4 | 36  | 10.7259 | 0.4214 | 1217.9 NDNS |
| 16427 Female | 35 | 62.1   | 26.07 | 13.5 | 88  | 10.9393 | 1.2268 | 759.8 NDNS  |
| 16428 Male   | 39 | 89.2   | 29.19 | 15.3 | 61  | 12.1043 | 2.1816 | 717.9 NDNS  |
| 16501 Female | 50 | 51.8   | 21.63 | 12   | 86  | 9.2306  | 2.7431 | 894.4 NDNS  |
| 16503 Female | 58 | 88.05  | 35    | 14.4 | 214 | 20.8951 | 1.075  | 1127.9 NDNS |
| 16517 Female | 64 | 72     | 27.32 | 13.1 | 77  | 10.1063 | 0.8892 | 1020.5 NDNS |
| 16518 Female | 20 | 52.3   | 18.16 | 12.2 | 43  | 7.4359  | 1.8925 | 755.9 NDNS  |
| 16519 Female | 50 | 68.7   | 30.29 | 12.7 | 36  | 4.0467  | 0.514  | 561.2 NDNS  |
| 16521 Female | 36 | 96.55  | 41.68 | 12.4 | 50  | 8.8319  | 2.1537 | 624.6 NDNS  |
| 16603 Female | 60 | 69     | 23.53 | 15.8 | 161 | 12.3723 | 2.3514 | 852.6 NDNS  |
| 16604 Male   | 32 | 70.75  | 21.32 | 14.6 | 78  | 15.9246 | 2.1077 | 1149.2 NDNS |
| 16605 Female | 64 | 65.1   | 26.55 | 15.7 | 22  | 7.9232  | 1.1698 | 679.9 NDNS  |
| 16606 Male   | 53 | 89.45  | 27.95 | 14   | 164 | 13.6978 | 3.5214 | 918.3 NDNS  |
| 16615 Male   | 37 | 76.4   | 27.18 | 16.8 | 241 | 17.1221 | 1.4885 | 1068.5 NDNS |
| 16626 Male   | 34 | 76.05  | 23.88 | 14   | 186 | 6.9212  | 1.8694 | 754.8 NDNS  |
| 16630 Male   | 22 | 77.15  | 21.84 | 15.5 | 109 | 8.1384  | 1.733  | 1010.9 NDNS |
| 16706 Female | 62 | 72.3   | 30.47 | 13.6 | 102 | 9.9133  | 2.6762 | 559.5 NDNS  |
| 16708 Male   | 20 | 82.35  | 24.93 | 15.2 | 28  | 14.2029 | 1.3789 | 1234.8 NDNS |
| 16712 Female | 57 | 58.7   | 20.24 | 13.9 | 27  | 14.3367 | 0      | 964.3 NDNS  |
| 16715 Female | 42 | 73.55  | 29.41 | 13.9 | 16  | 10.0308 | 1.9855 | 802.1 NDNS  |
| 16718 Female | 29 | 61.45  | 25.45 | 13.2 | 29  | 19.5593 | 1.6182 | 612.1 NDNS  |
| 16730 Male   | 46 | 131.4  | 34.38 | 16.3 | 350 | 18.5901 | 2.2056 | 1996.5 NDNS |
| 16732 Female | 41 | 68.4   | 27.07 | 14.1 | 17  | 11.4701 | 1.2618 | 996.2 NDNS  |
| 16735 Female | 19 | 53.35  | 19.34 | 13.4 | 30  | 15.4712 | 0.3661 | 848.1 NDNS  |
| 16804 Female | 40 | 65.3   | 24.09 | 14.3 | 17  | 12.8036 | 1.6402 | 810.7 NDNS  |
| 16807 Female | 42 | 91.3   | 38.32 | 14.4 | 39  | 4.3174  | 1.3774 | 346.5 NDNS  |
| 16808 Male   | 55 | 78.4   | 24.83 | 13.1 | 12  | 14.7724 | 0.8622 | 1368.7 NDNS |
| 16811 Female | 23 | 70.3   | 25.3  | 12.1 | 26  | 5.9004  | 0.6905 | 668.6 NDNS  |
| 16907 Female | 48 | 70.4   | 26.22 | 12.6 | 31  | 17.0328 | 1.2519 | 936.3 NDNS  |
| 16910 Female | 34 | 72.15  | 25.43 | 13.4 | 67  | 8.2834  | 0.8398 | 850.1 NDNS  |
| 16913 Female | 60 | 106.15 | 36.28 | 15.6 | 34  | 11.3475 | 1.6262 | 745.4 NDNS  |

|              |    |        |       |      |     |         |        |             |
|--------------|----|--------|-------|------|-----|---------|--------|-------------|
| 16914 Male   | 43 | 76.4   | 24.95 | 15.9 | 41  | 16.215  | 0      | 1458.9 NDNS |
| 16920 Female | 52 | 61.3   | 21.59 | 11.8 | 85  | 12.0812 | 1.2137 | 796.4 NDNS  |
| 16924 Male   | 55 | 75.95  | 26.78 | 14.8 | 82  | 6.0704  | 0.7442 | 682.7 NDNS  |
| 16927 Male   | 50 | 68.05  | 19.21 | 13   | 32  | 15.6851 | 0.5531 | 1140.7 NDNS |
| 16933 Female | 63 | 78.35  | 27.32 | 11.9 | 82  | 12.6998 | 2.3172 | 909.7 NDNS  |
| 16936 Female | 63 | 70.95  | 26.77 | 12.5 | 85  | 8.0961  | 0.2743 | 1226.3 NDNS |
| 17002 Female | 48 | 63.1   | 23.46 | 13   | 83  | 6.738   | 1.0626 | 1150.9 NDNS |
| 17005 Male   | 38 | 74.35  | 26.19 | 14.5 | 71  | 21.7574 | 2.1292 | 1157.5 NDNS |
| 17023 Male   | 46 | 93.4   | 28.64 | 15   | 159 | 10.281  | 0.901  | 1161.3 NDNS |
| 17024 Male   | 53 | 98.1   | 29.36 | 15.4 | 96  | 22.7659 | 2.3895 | 881.6 NDNS  |
| 17025 Female | 42 | 94     | 30.17 | 14.7 | 92  | 13.2353 | 2.8972 | 448.6 NDNS  |
| 17028 Female | 30 | 58.25  | 27.9  | 11.7 | 48  | 10.9329 | 1.7094 | 669.1 NDNS  |
| 17029 Male   | 31 | 67.2   | 22.98 | 13.3 | 42  | 7.6403  | 1.9999 | 532.1 NDNS  |
| 17030 Male   | 55 | 79.25  | 26.13 | 13.7 | 132 | 16.1033 | 1.8446 | 1078.2 NDNS |
| 17102 Female | 44 | 58.3   | 23.18 | 14.1 | 66  | 6.9517  | 1.0553 | 429.2 NDNS  |
| 17104 Female | 42 | 53.15  | 22.48 | 14.2 | 12  | 11.8802 | 0.7875 | 747.8 NDNS  |
| 17107 Female | 55 | 69.9   | 28    | 11.6 | 14  | 8.702   | 0.8558 | 1002.7 NDNS |
| 17109 Male   | 37 | 107.95 | 33.26 | 14.5 | 151 | 16.2043 | 3.6233 | 1215 NDNS   |
| 17110 Male   | 47 | 78.6   | 24.06 | 13.9 | 57  | 10.4811 | 0.7585 | 1156.3 NDNS |
| 17114 Female | 47 | 60.7   | 23.52 | 13.5 | 44  | 11.7053 | 1.2323 | 858.3 NDNS  |
| 17122 Male   | 64 | 82.2   | 28.71 | 15.5 | 65  | 13.5373 | 1.6417 | 824.5 NDNS  |
| 17125 Female | 38 | 64.35  | 26.61 | 14.2 | 145 | 11.1714 | 1.4007 | 818 NDNS    |
| 17126 Male   | 38 | 84.35  | 26.58 | 15.1 | 84  | 28.3633 | 4.8544 | 1708.9 NDNS |
| 17128 Female | 45 | 50.4   | 22.08 | 12.9 | 65  | 11.7576 | 1.2875 | 1099.1 NDNS |
| 17133 Male   | 27 | 73.5   | 22.29 | 16.9 | 77  | 9.0585  | 3.0348 | 888 NDNS    |
| 17135 Female | 61 | 63.35  | 23.47 | 12.1 | 60  | 12.6831 | 2.4901 | 1783.8 NDNS |
| 17136 Female | 37 | 70.2   | 25.79 | 11.7 | 66  | 13.2028 | 1.8659 | 812.1 NDNS  |
| 17137 Female | 34 | 84.3   | 30.35 | 13.9 | 13  | 8.3384  | 1.0667 | 595 NDNS    |
| 17207 Male   | 50 | 100.9  | 31.99 | 15.8 | 160 | 19.681  | 8.6017 | 1105.4 NDNS |
| 17208 Male   | 36 | 118.55 | 35.63 | 15.3 | 84  | 10.5943 | 2.5905 | 438 NDNS    |
| 17216 Female | 45 | 59     | 23.16 | 12.3 | 13  | 14.8527 | 0      | 930 NDNS    |
| 17224 Male   | 61 | 81.15  | 25.73 | 15.1 | 171 | 13.7122 | 4.0043 | 1118.6 NDNS |
| 17231 Female | 31 | 61.05  | 22.73 | 13.1 | 42  | 17.0889 | 2.353  | 686.9 NDNS  |
| 17237 Male   | 63 | 92.85  | 27.57 | 15.3 | 306 | 16.2212 | 1.3912 | 1643.2 NDNS |
| 17318 Female | 62 | 51.65  | 19.66 | 13.6 | 78  | 10.6534 | 2.4772 | 1345.6 NDNS |
| 17338 Male   | 36 | 109.25 | 37.3  | 15.3 | 77  | 11.0157 | 2.9629 | 764.9 NDNS  |
| 17401 Female | 34 | 84.9   | 33.54 | 14.4 | 108 | 9.5274  | 0      | 756.5 NDNS  |
| 17402 Female | 37 | 71.35  | 28.22 | 13.8 | 45  | 9.5441  | 1.3868 | 666.6 NDNS  |
| 17403 Female | 29 | 66.25  | 27.92 | 13.5 | 44  | 11.1532 | 2.6838 | 619.4 NDNS  |
| 17408 Female | 53 | 63.6   | 27.97 | 12.1 | 158 | 9.8626  | 1.8656 | 596.8 NDNS  |
| 17409 Female | 56 | 51.85  | 23.17 | 14.1 | 55  | 16.5463 | 2.9456 | 952.5 NDNS  |
| 17410 Female | 40 | 94.5   | 37.26 | 12.7 | 151 | 7.4308  | 2.7644 | 1042.5 NDNS |
| 17414 Female | 21 | 72.9   | 26.97 | 13.2 | 35  | 5.7794  | 2.3787 | 347.1 NDNS  |
| 17416 Male   | 48 | 84.8   | 27.82 | 14.9 | 129 | 9.3675  | 3.245  | 516.5 NDNS  |
| 17417 Male   | 27 | 76.9   | 26.91 | 14.8 | 153 | 12.6311 | 2.4899 | 880.4 NDNS  |
| 17418 Female | 59 | 53.4   | 21.1  | 11.8 | 84  | 6.1182  | 1.3057 | 410.2 NDNS  |
| 17424 Female | 64 | 61.6   | 23.23 | 12.5 | 132 | 11.4098 | 2.6455 | 831.5 NDNS  |
| 17427 Female | 33 | 68.3   | 25.33 | 12.7 | 39  | 16.5083 | 3.2879 | 755.3 NDNS  |
| 17514 Female | 36 | 64.1   | 23.44 | 12.6 | 18  | 11.2309 | 1.057  | 799.2 NDNS  |
| 17517 Male   | 32 | 84.9   | 26.38 | 15.1 | 133 | 10.7259 | 0.362  | 1250.2 NDNS |
| 17522 Female | 53 | 70.7   | 25.63 | 12.7 | 94  | 11.1521 | 1.4956 | 1027.5 NDNS |
| 17524 Female | 48 | 63.9   | 26.53 | 13   | 30  | 15.4424 | 0.1085 | 706.9 NDNS  |
| 17527 Male   | 39 | 78.9   | 24.11 | 15.5 | 163 | 10.3743 | 1.4975 | 1146.3 NDNS |
| 17531 Male   | 34 | 75.9   | 24.34 | 15   | 27  | 13.0823 | 2.5854 | 992.5 NDNS  |
| 17535 Female | 23 | 68.6   | 24.48 | 13.1 | 51  | 7.4095  | 0.6471 | 631.9 NDNS  |
| 17602 Male   | 53 | 91.2   | 30.99 | 13.7 | 54  | 8.3745  | 1.1552 | 1278.8 NDNS |
| 17608 Male   | 30 | 97.3   | 29.47 | 15.1 | 154 | 17.3863 | 1.0782 | 1057.1 NDNS |
| 17610 Male   | 39 | 68     | 24.86 | 17   | 45  | 12.9646 | 2.8214 | 1083.3 NDNS |

|              |    |       |       |      |     |         |        |             |
|--------------|----|-------|-------|------|-----|---------|--------|-------------|
| 17612 Female | 30 | 69.7  | 25.6  | 14.1 | 94  | 9.6952  | 2.7234 | 559.8 NDNS  |
| 17615 Male   | 35 | 97.55 | 31.15 | 15.1 | 121 | 4.6117  | 0.4228 | 590 NDNS    |
| 17631 Male   | 30 | 72.5  | 24.68 | 14.6 | 48  | 8.8158  | 3.8128 | 682.9 NDNS  |
| 17633 Male   | 25 | 65    | 21.43 | 15.2 | 97  | 11.8699 | 4.2877 | 598.8 NDNS  |
| 17639 Male   | 56 | 79.2  | 26.86 | 16   | 13  | 18.0329 | 4.2495 | 1217.4 NDNS |
| 17701 Male   | 53 | 71    | 23.08 | 13.3 | 18  | 7.4557  | 2.5113 | 867 NDNS    |
| 17702 Female | 35 | 60.1  | 24.79 | 12.2 | 18  | 6.6199  | 1.5725 | 461.3 NDNS  |
| 17707 Male   | 32 | 103.2 | 30.77 | 14.7 | 116 | 6.7315  | 1.6237 | 559.7 NDNS  |
| 17708 Female | 30 | 54.2  | 23.44 | 13.2 | 17  | 5.5035  | 1.897  | 866.2 NDNS  |
| 17709 Female | 52 | 72.2  | 29.25 | 12.4 | 61  | 12.0425 | 2.1138 | 1088.7 NDNS |
| 17711 Male   | 27 | 71.4  | 23.27 | 15.3 | 74  | 7.5327  | 1.824  | 856.1 NDNS  |
| 17712 Male   | 37 | 81.6  | 29.54 | 13.6 | 88  | 9.159   | 4.9653 | 614.5 NDNS  |
| 17717 Female | 21 | 81.9  | 27.88 | 12.8 | 16  | 4.3817  | 1.6689 | 444.7 NDNS  |
| 17719 Male   | 34 | 82    | 30.16 | 17.2 | 43  | 22.086  | 1.905  | 1123.6 NDNS |
| 17732 Female | 64 | 63.35 | 28.71 | 14.6 | 136 | 11.5085 | 0.8804 | 980 NDNS    |
| 17811 Female | 32 | 63.4  | 24.66 | 11.3 | 18  | 11.7097 | 0      | 1028.4 NDNS |
| 17812 Male   | 52 | 88.2  | 28.59 | 14.5 | 115 | 11.5539 | 3.5321 | 921.9 NDNS  |
| 17815 Female | 52 | 65.65 | 26.57 | 13.2 | 16  | 7.8352  | 1.2711 | 463.2 NDNS  |
| 17822 Male   | 31 | 56.7  | 19.17 | 13   | 51  | 7.4321  | 2.1314 | 687.6 NDNS  |
| 17823 Male   | 19 | 87.1  | 25.46 | 14.7 | 67  | 22.284  | 1.4914 | 1138.4 NDNS |
| 17826 Female | 36 | 63.5  | 21.61 | 11.5 | 32  | 13.5366 | 0      | 1005.1 NDNS |
| 17906 Male   | 31 | 60.6  | 18.88 | 15.6 | 74  | 15.8425 | 1.0668 | 3993.9 NDNS |
| 17910 Female | 50 | 76.2  | 28.72 | 13.6 | 97  | 10.3884 | 3.1156 | 669.6 NDNS  |
| 17916 Female | 34 | 73.5  | 28.43 | 13.2 | 14  | 7.1108  | 0.3573 | 506.4 NDNS  |
| 17921 Female | 28 | 64.6  | 22.77 | 12.8 | 71  | 5.0738  | 0.5529 | 489.9 NDNS  |
| 17938 Female | 36 | 113.7 | 38.5  | 12.9 | 83  | 3.8062  | 1.2363 | 390.4 NDNS  |
| 17939 Female | 39 | 66.9  | 26.63 | 13.6 | 19  | 9.1282  | 3.0415 | 859.4 NDNS  |
| 18003 Female | 51 | 75    | 29.7  | 14.3 | 68  | 10.9746 | 0      | 830 NDNS    |
| 18007 Female | 52 | 97.6  | 35.33 | 10.8 | 5   | 12.8868 | 1.6045 | 746.7 NDNS  |
| 18009 Male   | 40 | 68.75 | 24.77 | 16.8 | 44  | 16.0528 | 0      | 754.6 NDNS  |
| 18010 Male   | 63 | 65.2  | 28.24 | 13.2 | 42  | 5.7564  | 0      | 498.4 NDNS  |
| 18013 Female | 60 | 69.4  | 31.79 | 13.4 | 63  | 7.0074  | 0.8716 | 499 NDNS    |
| 18021 Male   | 60 | 87.5  | 32.04 | 15.2 | 36  | 15.4611 | 3.9559 | 1641.9 NDNS |
| 18039 Female | 36 | 62.45 | 25.68 | 11.7 | 34  | 8.4348  | 1.18   | 738.4 NDNS  |
| 18118 Male   | 23 | 74.3  | 23.45 | 17.2 | 72  | 9.7774  | 3.3889 | 749.5 NDNS  |
| 18122 Male   | 29 | 74.4  | 25.59 | 16   | 137 | 14.3581 | 5.7852 | 312.3 NDNS  |
| 18131 Female | 48 | 102.5 | 34.89 | 13.2 | 55  | 29.0939 | 1.3822 | 1106.8 NDNS |
| 18201 Male   | 53 | 89.6  | 30.52 | 13.8 | 180 | 10.0948 | 0.6298 | 952.1 NDNS  |
| 18203 Female | 44 | 64.8  | 26.17 | 11.2 | 12  | 20.3406 | 6.7357 | 1080.7 NDNS |
| 18205 Female | 39 | 52.4  | 18.92 | 14.8 | 57  | 9.3952  | 5.4637 | 1078.3 NDNS |
| 18210 Male   | 33 | 76.9  | 26.64 | 13.5 | 164 | 7.3125  | 2.0109 | 401.6 NDNS  |
| 18212 Male   | 30 | 72    | 23.32 | 13.1 | 198 | 8.3881  | 2.6183 | 337.9 NDNS  |
| 18215 Male   | 29 | 73.2  | 25.21 | 16.3 | 144 | 20.2007 | 3.426  | 1095.6 NDNS |
| 18321 Male   | 57 | 81    | 23.29 | 14.8 | 195 | 11.855  | 0      | 679.2 NDNS  |
| 18409 Male   | 30 | 91.4  | 26.31 | 15.4 | 90  | 15.2221 | 2.284  | 1280 NDNS   |
| 18414 Male   | 45 | 79.4  | 23.87 | 14.8 | 84  | 10.4798 | 1.5189 | 1021.2 NDNS |
| 18415 Female | 58 | 86.8  | 31.67 | 12.9 | 166 | 9.6417  | 0.7305 | 1063.1 NDNS |
| 18417 Female | 33 | 57.15 | 22.34 | 12.6 | 72  | 7.95    | 0.4716 | 820.2 NDNS  |
| 18418 Male   | 28 | 84.1  | 23.85 | 14.4 | 52  | 13.0529 | 1.8823 | 1143 NDNS   |
| 18422 Female | 59 | 62.65 | 22.13 | 13.4 | 77  | 9.7289  | 3.3295 | 486.7 NDNS  |
| 18430 Male   | 32 | 98.65 | 27.41 | 15.5 | 51  | 9.5232  | 0.967  | 645.1 NDNS  |
| 18433 Male   | 48 | 74.35 | 25.12 | 15.5 | 64  | 18.8902 | 6.623  | 962.2 NDNS  |
| 18436 Male   | 35 | 82.15 | 23.66 | 14.6 | 121 | 12.1205 | 2.5364 | 692.7 NDNS  |
| 18440 Female | 58 | 67    | 24.18 | 13.4 | 51  | 17.3661 | 0.9055 | 795.4 NDNS  |
| 18502 Male   | 36 | 71.2  | 26.98 | 15.2 | 214 | 10.6457 | 1.7657 | 1014.2 NDNS |
| 18505 Male   | 37 | 80.9  | 24.04 | 15.8 | 88  | 27.4731 | 0.8682 | 1349.3 NDNS |
| 18508 Male   | 49 | 85.3  | 29.36 | 14.9 | 239 | 10.7746 | 3.413  | 370.2 NDNS  |
| 18510 Female | 42 | 42.6  | 17.3  | 13   | 60  | 13.4103 | 1.2941 | 867.7 NDNS  |

|              |    |        |       |      |     |         |        |             |
|--------------|----|--------|-------|------|-----|---------|--------|-------------|
| 18512 Male   | 35 | 99.55  | 31.42 | 16   | 256 | 13.4775 | 6.4743 | 1059.1 NDNS |
| 18513 Female | 32 | 87.65  | 34.67 | 12.8 | 67  | 6.8914  | 2.8096 | 449 NDNS    |
| 18515 Male   | 26 | 74     | 25.41 | 13.7 | 67  | 13.7654 | 2.805  | 722.1 NDNS  |
| 18519 Male   | 24 | 55.8   | 17.57 | 13.1 | 33  | 21.2306 | 0      | 1294.3 NDNS |
| 18522 Male   | 46 | 79.75  | 23.92 | 14.3 | 101 | 14.2781 | 1.7625 | 1016.5 NDNS |
| 18523 Female | 37 | 73.6   | 29.15 | 12.3 | 38  | 11.9871 | 0.9794 | 799.6 NDNS  |
| 18526 Female | 60 | 67.7   | 30.35 | 12.7 | 72  | 9.7011  | 1.2902 | 532.1 NDNS  |
| 18527 Male   | 59 | 79.4   | 24.84 | 16.8 | 225 | 9.9246  | 4.7377 | 623 NDNS    |
| 18533 Male   | 35 | 66.1   | 22.45 | 12.2 | 13  | 15.718  | 2.6036 | 973.4 NDNS  |
| 18536 Male   | 41 | 102.25 | 27.87 | 15.9 | 150 | 26.5425 | 2.3085 | 1448.1 NDNS |
| 18537 Female | 38 | 59.1   | 25.6  | 13.7 | 40  | 8.1058  | 1.6403 | 326.5 NDNS  |
| 18604 Male   | 53 | 101.4  | 37.45 | 17.7 | 105 | 12.5762 | 0.7842 | 602.1 NDNS  |
| 18607 Female | 56 | 74     | 28.02 | 13   | 47  | 8.2347  | 1.1846 | 445.8 NDNS  |
| 18713 Female | 35 | 62.9   | 24.15 | 13.8 | 29  | 9.3405  | 0.9327 | 758.5 NDNS  |
| 18735 Female | 50 | 89.25  | 35.24 | 13   | 88  | 22.3632 | 2.1288 | 1176.9 NDNS |
| 18827 Female | 46 | 99.3   | 44.43 | 10.6 | 21  | 11.0895 | 2.2006 | 953.4 NDNS  |
| 18829 Female | 47 | 61.8   | 22.19 | 13.7 | 330 | 8.8454  | 1.8448 | 500.1 NDNS  |
| 18904 Female | 27 | 51.1   | 19.39 | 12.7 | 33  | 7.7388  | 0.8517 | 572.4 NDNS  |
| 18907 Female | 57 | 71.8   | 26.79 | 15.2 | 58  | 8.5406  | 0.5744 | 841.4 NDNS  |
| 18911 Female | 40 | 66.3   | 23.63 | 14.1 | 24  | 11.0667 | 2.2158 | 641.4 NDNS  |
| 19007 Female | 53 | 98.7   | 35.73 | 12.6 | 35  | 9.6152  | 0      | 534.8 NDNS  |
| 19009 Male   | 35 | 94.05  | 32.07 | 15.9 | 407 | 16.4553 | 2.8217 | 984.9 NDNS  |
| 19015 Male   | 27 | 82.3   | 26.23 | 15.2 | 41  | 13.7359 | 3.2018 | 1116.2 NDNS |
| 19020 Male   | 34 | 88.9   | 27.39 | 15.7 | 65  | 16.0741 | 2.8584 | 1263 NDNS   |
| 19026 Female | 41 | 62.6   | 23.75 |      | 32  | 13.8541 | 3.221  | 668.4 NDNS  |
| 19103 Female | 54 | 66.85  | 24.07 | 16.7 | 212 | 9.9878  | 1.3586 | 391 NDNS    |
| 19104 Male   | 50 | 87.5   | 26.29 | 14.7 | 166 | 5.3347  | 0.373  | 550.7 NDNS  |
| 19107 Female | 64 | 57.6   | 25.5  | 13.4 | 141 | 3.7121  | 0.1457 | 605.8 NDNS  |
| 19108 Female | 60 | 72.2   | 29.63 | 14.3 | 150 | 10.9311 | 0.0908 | 476.4 NDNS  |
| 19110 Female | 53 | 59.4   | 23.45 | 14.8 | 12  | 9.8723  | 0      | 684 NDNS    |
| 19126 Female | 49 | 54     | 21.69 | 12.4 | 6   | 9.7518  | 1.4477 | 694.3 NDNS  |
| 19135 Female | 55 | 46.5   | 16.47 | 10.4 | 5   | 10.1402 | 1.3869 | 968.4 NDNS  |
| 19206 Male   | 47 | 87.95  | 30.36 | 14.5 | 202 | 18.0936 | 7.3047 | 1308 NDNS   |
| 19222 Male   | 53 | 87.4   | 25.96 | 15   | 101 | 16.1435 | 4.4218 | 493.9 NDNS  |
| 19227 Female | 49 | 78.55  | 31.51 | 13.6 | 118 | 10.8972 | 0.3485 | 808.1 NDNS  |
| 19231 Male   | 33 | 98.4   | 28.06 | 15.3 | 18  | 13.0419 | 4.1728 | 949.4 NDNS  |
| 19235 Female | 24 | 53.15  | 19.83 | 14.9 | 29  | 9.5032  | 1.6436 | 855 NDNS    |
| 19311 Female | 32 | 93.75  | 34.64 | 13.9 | 78  | 12.0166 | 1.2276 | 722.3 NDNS  |
| 19336 Female | 41 | 81.5   | 33.43 | 14.8 | 105 | 7.8583  | 2.3262 | 530.3 NDNS  |
| 19338 Female | 32 | 54.3   | 20.41 | 13.4 | 79  | 4.7274  | 0.5171 | 356.5 NDNS  |
| 19407 Female | 56 | 77.3   | 32.81 | 13.3 | 49  | 7.4603  | 0.5523 | 1044.2 NDNS |
| 19409 Female | 38 | 70.8   | 28.83 | 13.2 | 31  | 8.0429  | 2.0959 | 324.9 NDNS  |
| 19410 Female | 20 | 46.3   | 18.36 | 10.8 | 15  | 10.7231 | 0      | 1299.6 NDNS |
| 19502 Male   | 41 | 109.75 | 32.84 | 14.2 | 113 | 18.8687 | 1.6987 | 919.4 NDNS  |
| 19507 Female | 35 | 64.5   | 24.35 | 14.2 | 33  | 10.3483 | 0      | 611.4 NDNS  |
| 19516 Male   | 48 | 84.85  | 27.66 | 15.2 | 22  | 11.1083 | 0.891  | 885.1 NDNS  |
| 19522 Female | 30 | 63.4   | 23.62 | 12.1 | 32  | 15.0977 | 0.0677 | 534.8 NDNS  |
| 19529 Male   | 35 | 116.9  | 31.22 | 15.5 | 105 | 12.4775 | 2.5418 | 1168.6 NDNS |
| 19538 Female | 38 | 81     | 30.02 | 13.7 | 31  | 17.3003 | 0      | 1176.6 NDNS |
| 19604 Male   | 30 | 61.15  | 19.74 | 13.1 | 166 | 14.3167 | 2.0798 | 814.4 NDNS  |
| 19605 Female | 38 | 53.1   | 22.07 | 13.3 | 5   | 14.7324 | 0      | 1052.9 NDNS |
| 19611 Male   | 20 | 95.3   | 27.88 | 13.8 | 85  | 8.9146  | 5.2377 | 431.6 NDNS  |
| 19614 Female | 39 | 94.25  | 38.14 | 13   | 23  | 6.3079  | 1.627  | 652.6 NDNS  |
| 19616 Male   | 62 | 77.35  | 27.5  | 13   | 134 | 10.0258 | 0.756  | 830.8 NDNS  |
| 19617 Male   | 41 | 75.95  | 26.02 | 16.4 | 55  | 22.3395 | 0.572  | 1304.5 NDNS |
| 19622 Male   | 47 | 79.3   | 25.14 | 14   | 187 | 15.4044 | 0.3442 | 1210.3 NDNS |
| 19626 Female | 54 | 65.7   | 24    | 12.5 | 44  | 16.918  | 0      | 689.8 NDNS  |
| 19627 Female | 33 | 65     | 26.9  | 13.1 | 35  | 9.805   | 0.594  | 815.3 NDNS  |

|              |    |        |       |      |     |         |        |             |
|--------------|----|--------|-------|------|-----|---------|--------|-------------|
| 19632 Female | 26 | 47.05  | 21.42 | 13.7 | 33  | 6.2746  | 0      | 719.4 NDNS  |
| 19633 Male   | 36 | 65.6   | 26.58 | 16.2 | 73  | 17.0675 | 3.0229 | 409.3 NDNS  |
| 19707 Male   | 42 | 91.1   | 29.09 | 15.6 | 211 | 9.5926  | 1.3657 | 1047.4 NDNS |
| 19710 Female | 33 | 61.3   | 22.34 | 15   | 23  | 14.8566 | 1.8231 | 718.3 NDNS  |
| 19713 Female | 37 | 71.3   | 26.57 | 14.4 | 132 | 12.3371 | 2.962  | 619.3 NDNS  |
| 19717 Male   | 46 | 75.35  | 21.76 | 15.7 | 56  | 12.0289 | 0.7774 | 1228.8 NDNS |
| 19718 Male   | 20 | 56.9   | 19.3  |      | 60  | 4.8187  | 1.7276 | 263.4 NDNS  |
| 19719 Female | 37 | 76.8   | 30.63 | 13   | 38  | 3.5247  | 0.2102 | 897.9 NDNS  |
| 19727 Female | 64 | 70.9   | 25.58 | 13   | 48  | 10.4716 | 1.8494 | 981.4 NDNS  |
| 19729 Female | 47 | 58.5   | 21.53 | 14   | 46  | 7.1018  | 2.6364 | 286 NDNS    |
| 19737 Female | 25 | 82.4   | 30.45 | 13.3 | 90  | 10.5877 | 0.9767 | 1317.9 NDNS |
| 19739 Male   | 57 | 73     | 26.14 | 15.9 | 42  | 12.4784 | 1.7817 | 1145.9 NDNS |
| 19801 Male   | 54 | 99.4   | 28.49 | 15.3 | 138 | 12.3    | 2.5583 | 849 NDNS    |
| 19806 Male   | 25 | 91.15  | 29.75 | 15   | 109 | 8.8965  | 5.9692 | 901.7 NDNS  |
| 19810 Male   | 19 | 109.05 | 33.6  | 16.6 | 138 | 14.5247 | 1.5712 | 1793.8 NDNS |
| 19815 Female | 62 | 70.35  | 25.06 | 12.3 | 100 | 11.7367 | 2.8559 | 763.4 NDNS  |
| 19816 Male   | 52 | 109.2  | 35.7  | 15.8 | 383 | 17.8618 | 3.3152 | 1258.4 NDNS |
| 19825 Male   | 36 | 58.6   | 23.18 | 9.5  | 686 | 16.7379 | 2.951  | 1851.1 NDNS |
| 20028 Female | 59 | 86.75  | 29.65 | 12.9 | 162 | 9.8084  | 0.5858 | 1133 NDNS   |
| 20033 Male   | 42 | 86.65  | 30.61 | 16.4 | 65  | 10.8212 | 2.6945 | 677.5 NDNS  |
| 20102 Female | 31 | 62.85  | 23.95 | 14.7 | 58  | 11.0775 | 1.5936 | 783.4 NDNS  |
| 20103 Male   | 46 | 95.75  | 29.15 | 15   | 150 | 14.8509 | 2.6583 | 1427.6 NDNS |
| 20105 Male   | 59 | 111    | 29.45 | 14.7 | 29  | 16.0448 | 1.9239 | 1896.8 NDNS |
| 20114 Female | 26 | 46.7   | 18.4  | 13.3 | 51  | 9.1715  | 2.8614 | 567.4 NDNS  |
| 20117 Female | 39 | 70.9   | 27.52 | 13.7 | 19  | 4.0751  | 0      | 286.7 NDNS  |
| 20119 Female | 33 | 80.05  | 29.47 | 14.8 | 20  | 8.9919  | 3.4865 | 476.8 NDNS  |
| 20122 Female | 32 | 71.4   | 26.29 | 14.3 | 25  | 8.7923  | 1.8748 | 815.7 NDNS  |
| 20134 Female | 20 | 55.1   | 20.59 | 13.6 | 21  | 6.8649  | 0      | 480.1 NDNS  |
| 20136 Female | 20 | 54.8   | 20.25 | 14.9 | 23  | 6.3313  | 3.3538 | 911.1 NDNS  |
| 20140 Female | 60 | 70.3   | 26.99 | 12.2 | 39  | 21.5206 | 0.2843 | 1451.2 NDNS |
| 20214 Female | 37 | 49.1   | 20.36 | 13.8 | 38  | 7.4019  | 0.5716 | 738.2 NDNS  |
| 20228 Female | 20 | 48.35  | 18.89 | 13.5 | 43  | 8.1356  | 0.9391 | 502.2 NDNS  |
| 20307 Male   | 20 | 92.35  | 29.43 | 15.2 | 83  | 11.2259 | 3.435  | 623.2 NDNS  |
| 20308 Female | 62 | 49.6   | 19.98 | 14   | 15  | 8.391   | 2.2798 | 575.1 NDNS  |
| 20309 Female | 41 | 64.75  | 24.12 | 11.1 | 8   | 13.0281 | 1.4311 | 1019.9 NDNS |
| 20311 Male   | 28 | 78.7   | 27.17 | 14.7 | 131 | 14.5381 | 0.4155 | 906.4 NDNS  |
| 20313 Female | 54 | 69.5   | 24.86 | 15.2 | 90  | 10.0797 | 2.0102 | 612.1 NDNS  |
| 20318 Male   | 30 | 78.9   | 26.27 | 12.7 | 22  | 21.8347 | 2.7438 | 1070.2 NDNS |
| 20320 Female | 36 | 55     | 22.2  | 13.3 | 134 | 2.5443  | 0.495  | 255.4 NDNS  |
| 20322 Female | 37 | 60.7   | 22.54 | 12.6 | 30  | 12.3628 | 1.1897 | 907.6 NDNS  |
| 20325 Male   | 53 | 95.25  | 29.89 | 15.7 | 101 | 6.4844  | 1.3263 | 952.3 NDNS  |
| 20327 Female | 44 | 53.15  | 23.83 | 12.9 | 20  | 12.7968 | 0.2864 | 698.8 NDNS  |
| 20330 Female | 38 | 91     | 34.19 | 13.2 | 69  | 10.1401 | 1.4803 | 1061.6 NDNS |
| 20333 Male   | 58 | 80.65  | 24.88 | 14.4 | 188 | 15.9695 | 3.239  | 1130.9 NDNS |
| 20339 Female | 43 | 53.55  | 20.07 | 13.1 | 25  | 14.7171 | 3.7667 | 1073.4 NDNS |
| 20403 Female | 34 | 57.45  | 22.95 | 14.6 | 32  | 9.8836  | 1.6291 | 783.2 NDNS  |
| 20405 Female | 57 | 61.5   | 22.16 | 13.2 | 90  | 14.6244 | 0.6032 | 853 NDNS    |
| 20412 Male   | 28 | 70.5   | 21.76 | 15.4 | 173 | 8.2027  | 0.9797 | 633.2 NDNS  |
| 20416 Female | 56 | 68.9   | 22.97 | 15.2 | 38  | 12.2215 | 0.1452 | 1450.4 NDNS |
| 20420 Male   | 37 | 81.2   | 25.29 | 15.2 | 218 | 12.495  | 2.1704 | 815.6 NDNS  |
| 20426 Male   | 56 | 100.3  | 33.19 | 14.2 | 104 | 15.1254 | 1.9872 | 1194.6 NDNS |
| 20427 Male   | 64 | 77.05  | 23.54 | 14.1 | 79  | 11.4303 | 1.02   | 1166.8 NDNS |
| 20429 Male   | 64 | 76.8   | 24.85 | 13.8 | 193 | 12.3563 | 1.6595 | 861.1 NDNS  |
| 20438 Male   | 39 | 96.85  | 30.19 | 16.2 | 90  | 21.5608 | 3.8108 | 1772.3 NDNS |
| 20508 Female | 53 | 72.7   | 25.27 | 13.4 | 22  | 17.1362 | 2.5322 | 1207 NDNS   |
| 20509 Male   | 63 | 76.6   | 23.54 | 16.8 | 90  | 11.6594 | 0      | 1324 NDNS   |
| 20520 Male   | 41 | 70.35  | 22.84 | 16.4 | 156 | 11.9534 | 1.2125 | 1137.1 NDNS |
| 20521 Male   | 47 | 73.5   | 23.69 | 14.5 | 91  | 13.4585 | 1.3097 | 958.2 NDNS  |

|              |    |       |       |      |     |         |        |             |
|--------------|----|-------|-------|------|-----|---------|--------|-------------|
| 20530 Male   | 47 | 81.55 | 28.42 | 14.9 | 132 | 14.3531 | 3.5153 | 901.9 NDNS  |
| 20536 Male   | 43 | 68.4  | 18.71 | 14.7 | 113 | 6.1248  | 2.1309 | 448.9 NDNS  |
| 20604 Male   | 49 | 83.35 | 26.95 | 15.2 | 200 | 11.5625 | 3.4359 | 1027.6 NDNS |
| 20612 Female | 56 | 55.7  | 23.84 | 13.3 | 96  | 12.3156 | 1.7959 | 993.8 NDNS  |
| 20619 Female | 44 | 63.6  | 23.53 | 13.1 | 49  | 13.9261 | 3.1379 | 1510.2 NDNS |
| 20621 Female | 58 | 67.7  | 24.39 | 12.2 | 23  | 15.6861 | 0.0531 | 830.1 NDNS  |
| 20624 Male   | 42 | 69.2  | 25.26 | 15.5 | 84  | 8.8541  | 0.8016 | 1319.1 NDNS |
| 20626 Male   | 41 | 91.6  | 26.65 | 16.6 | 355 | 12.1038 | 3.4135 | 538.2 NDNS  |
| 20629 Male   | 39 | 84.8  | 26.82 | 15.1 | 82  | 19.4697 | 2.1406 | 1445.5 NDNS |
| 20630 Male   | 36 | 74.85 | 22.72 | 16.7 | 127 | 10.9146 | 3.1604 | 948 NDNS    |
| 20702 Female | 53 | 58.7  | 22.83 | 13.6 | 40  | 15.6658 | 1.5817 | 946.1 NDNS  |
| 20704 Male   | 43 | 99.4  | 28.23 | 14.3 | 159 | 10.3166 | 1.7928 | 1008.7 NDNS |
| 20708 Male   | 27 | 73.6  | 21.61 | 15.8 | 39  | 18.8559 | 1.0341 | 910.5 NDNS  |
| 20713 Female | 63 | 58.8  | 26.15 | 15.7 | 61  | 6.0789  | 0.9726 | 837.4 NDNS  |
| 20714 Female | 42 | 52.5  | 22.15 | 13.9 | 45  | 17.43   | 0.9265 | 515.4 NDNS  |
| 20716 Male   | 42 | 71.8  | 24.45 | 12.7 | 39  | 17.2507 | 1.45   | 1222 NDNS   |
| 20717 Male   | 59 | 74.7  | 25.53 | 14.2 | 204 | 13.3296 | 2.2821 | 630.4 NDNS  |
| 20725 Female | 30 | 51.9  | 20.12 | 13.1 | 7   | 7.6827  | 0      | 538.5 NDNS  |
| 20730 Male   | 30 | 81.1  | 25.6  | 16.9 | 53  | 11.1213 | 2.1286 | 701.6 NDNS  |
| 20732 Female | 58 | 60.95 | 25    | 17.4 | 97  | 11.8192 | 1.305  | 763.7 NDNS  |
| 20736 Male   | 56 | 74.8  | 26.79 | 14.3 | 174 | 8.3502  | 1.1272 | 938.9 NDNS  |
| 20738 Male   | 51 | 76.9  | 25.53 | 15.4 | 31  | 22.3998 | 1.3906 | 1094.3 NDNS |
| 20740 Male   | 52 | 85.2  | 31.26 | 14.3 | 33  | 12.3444 | 5.0706 | 1383.5 NDNS |
| 20802 Female | 39 | 53.4  | 21.06 | 14.2 | 55  | 15.9272 | 0.3502 | 699.6 NDNS  |
| 20806 Female | 57 | 97    | 38.61 | 14.6 | 77  | 10.2215 | 0.4461 | 930.3 NDNS  |
| 20833 Male   | 33 | 88.5  | 26.91 | 14.2 | 166 | 6.9934  | 2.7805 | 646.3 NDNS  |
| 20834 Male   | 51 | 83.1  | 27.96 | 14.5 | 100 | 14.5828 | 2.1662 | 1001.5 NDNS |
| 20836 Male   | 48 | 94.5  | 27.81 | 16.1 | 17  | 8.2427  | 0.6223 | 858.8 NDNS  |
| 20839 Male   | 36 | 94.8  | 28.22 | 15.8 | 80  | 19.6047 | 0.8691 | 1017.3 NDNS |
| 20911 Female | 31 | 44.1  | 18.12 | 13   | 35  | 5.8748  | 1.5893 | 665.4 NDNS  |
| 20914 Male   | 42 | 68.75 | 22.02 | 15.2 | 158 | 14.7931 | 2.5236 | 1176.4 NDNS |
| 20917 Male   | 53 | 93.85 | 28.5  | 14.8 | 82  | 14.2972 | 2.6477 | 1442.2 NDNS |
| 20929 Female | 38 | 69    | 26.21 | 12.8 | 41  | 12.3063 | 3.4727 | 1411.1 NDNS |
| 20930 Male   | 31 | 87.8  | 26.92 | 14.4 | 152 | 8.1993  | 3.152  | 608.7 NDNS  |
| 20931 Male   | 60 | 86.8  | 25.68 | 14   | 163 | 11.9994 | 3.9681 | 889.2 NDNS  |
| 21003 Female | 46 | 61.95 | 20.63 | 12.7 | 33  | 13.581  | 1.7632 | 936.6 NDNS  |
| 21009 Male   | 55 | 83.3  | 31.84 | 14   | 20  | 12.5578 | 1.8309 | 1495.8 NDNS |
| 21019 Female | 44 | 56.95 | 22.99 | 12.7 | 40  | 7.832   | 2.0738 | 566.7 NDNS  |
| 21107 Female | 33 | 55.05 | 20.71 | 14.1 | 65  | 8.3226  | 0.4501 | 489.9 NDNS  |
| 21109 Male   | 29 | 71.95 | 24.69 | 15.3 | 170 | 24.4548 | 3.7431 | 1048.4 NDNS |
| 21112 Female | 29 | 61    | 25.47 | 12.9 | 26  | 7.8947  | 1.8749 | 664.9 NDNS  |
| 21115 Male   | 23 | 72.4  | 25.01 | 16.9 | 155 | 12.0453 | 2.3329 | 1375.1 NDNS |
| 21122 Male   | 48 | 107   | 30.24 | 15.6 | 48  | 22.0768 | 8.1043 | 1689.4 NDNS |
| 21123 Female | 37 | 62.3  | 24.69 | 13.8 | 18  | 5.6467  | 0.6414 | 580 NDNS    |
| 21125 Female | 32 | 73.65 | 24.68 | 13   | 78  | 16.2634 | 1.7349 | 911.4 NDNS  |
| 21130 Male   | 38 | 105.9 | 32.2  | 15.8 | 245 | 15.9305 | 0.3478 | 1427.4 NDNS |
| 21136 Male   | 41 | 70.8  | 23.01 | 14.6 | 24  | 21.5858 | 1.0022 | 1596.1 NDNS |
| 21137 Male   | 35 | 93    | 30.45 | 17.2 | 184 | 20.1478 | 1.4739 | 1273.7 NDNS |
| 21140 Female | 36 | 57.45 | 24.3  | 13.9 | 39  | 13.8785 | 0.1732 | 1032.5 NDNS |
| 21201 Female | 39 | 66.9  | 24.56 | 12.3 | 48  | 20.3201 | 3.4785 | 1167 NDNS   |
| 21211 Female | 31 | 74.5  | 23.91 | 12.6 | 44  | 13.8708 | 0.6225 | 932.9 NDNS  |
| 21215 Male   | 27 | 61.7  | 19.11 | 14.9 | 64  | 14.4262 | 1.9255 | 1069.8 NDNS |
| 21216 Female | 27 | 57.8  | 22.63 | 12.3 | 50  | 9.4096  | 0.5204 | 899.3 NDNS  |
| 21217 Female | 31 | 58.65 | 22.17 | 13.5 | 73  | 10.4774 | 0.9092 | 527.8 NDNS  |
| 21220 Female | 39 | 64.5  | 24.88 | 13.3 | 112 | 8.3768  | 0.5289 | 800.1 NDNS  |
| 21231 Male   | 55 | 80.5  | 29.71 | 16.6 | 208 | 10.1702 | 1.9035 | 842.5 NDNS  |
| 21233 Female | 35 | 54.1  | 21.09 | 14.3 | 24  | 7.1293  | 1.641  | 635.1 NDNS  |
| 21238 Female | 26 | 69.45 | 23.83 | 14   | 54  | 10.5298 | 1.6775 | 753.7 NDNS  |



|              |    |        |       |      |     |         |        |             |
|--------------|----|--------|-------|------|-----|---------|--------|-------------|
| 21302 Female | 22 | 80.2   | 27    | 12.9 | 54  | 11.961  | 1.9279 | 1088.4 NDNS |
| 21311 Male   | 41 | 90.9   | 31.56 | 16   | 220 | 12.5414 | 2.692  | 1570.9 NDNS |
| 21322 Male   | 34 | 68.55  | 22.08 | 15.8 | 100 | 15.0151 | 2.5634 | 1175.7 NDNS |
| 21325 Male   | 37 | 94.25  | 30.88 | 14.8 | 149 | 20.6054 | 9.6688 | 1481.4 NDNS |
| 21329 Male   | 32 | 83.25  | 28.45 | 15.6 | 188 | 8.4305  | 3.9179 | 928.8 NDNS  |
| 21333 Male   | 38 | 72.2   | 21.56 | 15.3 | 72  | 13.4283 | 2.6739 | 983.3 NDNS  |
| 21334 Female | 21 | 60     | 24.45 | 14.6 | 21  | 8.4517  | 2.5212 | 589.7 NDNS  |
| 21335 Male   | 49 | 79.15  | 26.93 | 16.3 | 211 | 10.826  | 2.6985 | 389.7 NDNS  |
| 21339 Male   | 22 | 67.5   | 21.27 | 14.5 | 54  | 12.1453 | 1.7272 | 843.3 NDNS  |
| 21406 Female | 42 | 53.3   | 20.92 | 12.4 | 12  | 9.2055  | 0      | 1056.2 NDNS |
| 21408 Male   | 40 | 70.2   | 25.35 | 15.9 | 81  | 6.4682  | 1.783  | 487.1 NDNS  |
| 21411 Male   | 47 | 94.65  | 27.31 | 15.4 | 82  | 22.4965 | 0.5152 | 952.7 NDNS  |
| 21419 Female | 63 | 90.55  | 32.57 | 12   | 66  | 4.4995  | 0.6565 | 170.5 NDNS  |
| 21423 Female | 55 | 74.6   | 24.35 | 13.2 | 122 | 11.974  | 1.3116 | 975 NDNS    |
| 21424 Male   | 64 | 78.05  | 25.5  | 15.7 | 279 | 16.0332 | 2.1318 | 713.2 NDNS  |
| 21426 Male   | 58 | 72.85  | 26.14 | 13.3 | 76  | 10.5075 | 2.1876 | 698.8 NDNS  |
| 21502 Female | 56 | 88.8   | 38.33 | 12.2 | 95  | 13.2003 | 0.1756 | 855.8 NDNS  |
| 21509 Female | 46 | 62.4   | 23.98 | 13.6 | 26  | 10.7868 | 1.4507 | 591.3 NDNS  |
| 21518 Male   | 39 | 67.3   | 22.5  | 15.2 | 82  | 9.7297  | 2.3803 | 1207.5 NDNS |
| 21522 Male   | 20 | 92.5   | 32.2  | 15.8 | 78  | 13.205  | 3.5192 | 536 NDNS    |
| 21536 Female | 62 | 67.8   | 24.01 | 13.2 | 54  | 6.7002  | 1.3467 | 413.8 NDNS  |
| 21537 Female | 50 | 95.3   | 34.56 | 13.4 | 75  | 10.6132 | 1.2795 | 1027.5 NDNS |
| 21601 Male   | 58 | 77     | 25.7  | 15.2 | 204 | 13.452  | 3.7973 | 1001.7 NDNS |
| 21605 Male   | 51 | 87.7   | 28.1  | 16.2 | 42  | 2.7819  | 0.3785 | 355.9 NDNS  |
| 21612 Male   | 27 | 70.25  | 22.11 | 14   | 47  | 9.3846  | 3.154  | 955.2 NDNS  |
| 21615 Female | 23 | 65.95  | 23.7  | 12.6 | 32  | 7.7608  | 3.3742 | 715.9 NDNS  |
| 21619 Female | 28 | 48.75  | 17.61 | 13.5 | 25  | 9.5256  | 1.3302 | 756.8 NDNS  |
| 21624 Female | 27 | 66.9   | 27.26 | 14.5 | 35  | 3.0471  | 0.5668 | 379.8 NDNS  |
| 21629 Male   | 55 | 112.75 | 35.13 | 16.5 | 98  | 11.5768 | 3.6893 | 964.3 NDNS  |
| 21631 Male   | 54 | 81.25  | 24.8  | 14.9 | 86  | 13.851  | 4.1149 | 765.3 NDNS  |
| 21638 Male   | 42 | 75.25  | 24.17 | 15.6 | 224 | 8.6377  | 3.0468 | 659.1 NDNS  |
| 21704 Male   | 52 | 101.25 | 31.55 | 14.5 | 21  | 17.0741 | 2.2008 | 1827.8 NDNS |
| 21706 Male   | 55 | 77.4   | 24.1  | 12.6 | 144 | 13.5534 | 2.4368 | 1729.6 NDNS |
| 21711 Female | 35 | 83.2   | 32.91 | 14.1 | 121 | 6.8624  | 1.6818 | 728 NDNS    |
| 21712 Female | 30 | 59.25  | 23.57 | 13.3 | 22  | 9.3881  | 1.8842 | 847 NDNS    |
| 21725 Female | 39 | 73.35  | 27.9  | 13.9 | 60  | 11.5407 | 1.4749 | 659.3 NDNS  |
| 21727 Male   | 35 | 78.5   | 24.35 | 14.7 | 115 | 12.6544 | 5.5818 | 668.3 NDNS  |
| 21732 Female | 33 | 67.55  | 24.65 | 12.7 | 18  | 11.1159 | 1.0433 | 1347.2 NDNS |
| 21737 Male   | 47 | 83.2   | 27.83 | 17.3 | 183 | 12.2171 | 2.4725 | 639.9 NDNS  |
| 21802 Female | 33 | 57.2   | 24.44 | 15.6 | 40  | 3.5804  | 1.6801 | 430.6 NDNS  |
| 21805 Male   | 36 | 77.6   | 22.92 | 15.4 | 156 | 15.5018 | 2.5254 | 1157.7 NDNS |
| 21826 Male   | 48 | 85.85  | 28.31 | 15.6 | 57  | 7.9948  | 1.9334 | 778.6 NDNS  |
| 21902 Female | 56 | 84.5   | 34.35 | 13.6 | 58  | 16.2739 | 1.5821 | 757.9 NDNS  |
| 21903 Female | 46 | 73.2   | 25.74 | 13.3 | 62  | 15.5591 | 2.5031 | 1257.3 NDNS |
| 21906 Female | 53 | 85.8   | 29.51 | 12.6 | 9   | 13.0645 | 1.1689 | 1068.6 NDNS |
| 21910 Male   | 34 | 70.6   | 21.99 | 14.5 | 90  | 14.2463 | 2.7879 | 1041.6 NDNS |
| 21913 Male   | 20 | 63.3   | 20.56 | 15.7 | 105 | 5.5132  | 1.0444 | 654.3 NDNS  |
| 21916 Male   | 54 | 86.6   | 32.86 | 15   | 119 | 11.7223 | 2.4211 | 1142.7 NDNS |
| 21919 Female | 43 | 75.9   | 28.01 | 11.5 | 18  | 8.7754  | 0.8853 | 961.5 NDNS  |
| 21920 Female | 33 | 87.5   | 35.77 | 12.3 | 20  | 9.5621  | 0.7339 | 779.6 NDNS  |
| 21925 Female | 37 | 58.85  | 21.77 | 14.5 | 44  | 15.7745 | 2.8702 | 1003.6 NDNS |
| 21926 Female | 38 | 57.1   | 21.27 | 13.5 | 25  | 11.9706 | 2.4401 | 763.4 NDNS  |
| 21927 Female | 28 | 91.7   | 34.75 | 13.7 | 41  | 9.2442  | 0.9645 | 461.9 NDNS  |
| 21928 Female | 24 | 57.3   | 21.24 | 14.4 | 38  | 12.08   | 2.2835 | 874 NDNS    |
| 21930 Male   | 63 | 83.6   | 27.5  | 14.3 | 22  | 20.4558 | 1.2409 | 1458.1 NDNS |
| 22001 Male   | 37 | 80.4   | 28.12 | 14.1 | 76  | 10.9842 | 1.8015 | 845.9 NDNS  |
| 22008 Male   | 36 | 133.7  | 36.25 | 15.1 | 588 | 13.3247 | 1.8444 | 1270.9 NDNS |
| 22013 Female | 33 | 85.6   | 34.44 | 13.1 | 11  | 10.5684 | 0      | 698.5 NDNS  |

|              |    |       |       |      |     |         |        |             |
|--------------|----|-------|-------|------|-----|---------|--------|-------------|
| 22015 Male   | 54 | 57.65 | 21.05 | 15.3 | 26  | 8.1347  | 0.6542 | 853.5 NDNS  |
| 22017 Male   | 54 | 71.65 | 22.2  | 15.8 | 278 | 12.9248 | 4.5665 | 1641.8 NDNS |
| 22028 Male   | 26 | 79.9  | 26.07 | 16.6 | 39  | 24.891  | 0      | 951.3 NDNS  |
| 22030 Female | 29 | 66.25 | 24.75 | 15   | 28  | 8.7235  | 1.693  | 1108.9 NDNS |
| 22033 Female | 61 | 77.95 | 29.7  | 14.6 | 20  | 14.1006 | 0.3294 | 894.2 NDNS  |
| 22036 Male   | 51 | 81.3  | 25.3  | 15.9 | 159 | 14.4762 | 3.5391 | 1405.4 NDNS |
| 22037 Male   | 47 | 69.7  | 24.05 | 16.3 | 52  | 3.8619  | 0.6511 | 424.3 NDNS  |
| 22101 Female | 29 | 48    | 21.09 | 13.2 | 27  | 7.4717  | 1.1131 | 630.5 NDNS  |
| 22107 Female | 31 | 44.4  | 19.73 | 13.9 | 149 | 5.9009  | 0.7552 | 729.3 NDNS  |
| 22108 Female | 33 | 72.8  | 27.3  | 12.6 | 43  | 22.1084 | 1.7056 | 1185.5 NDNS |
| 22109 Male   | 62 | 65    | 22.5  | 14.6 | 74  | 23.2436 | 0      | 1394.1 NDNS |
| 22116 Male   | 64 | 67.6  | 22.57 | 14   | 106 | 7.8526  | 2.1223 | 475.8 NDNS  |
| 22126 Female | 38 | 92.9  | 33.94 | 15.4 | 21  | 2.5396  | 0.9769 | 200.3 NDNS  |
| 22131 Male   | 42 | 100   | 30.71 | 16.5 | 144 | 13.4973 | 3.8268 | 1116.5 NDNS |
| 22203 Female | 60 | 71.45 | 26.28 | 13.2 | 71  | 8.6894  | 1.7816 | 601.5 NDNS  |
| 22205 Female | 50 | 78.55 | 29.44 | 13.8 | 46  | 10.5018 | 2.6551 | 1092.1 NDNS |
| 22207 Male   | 44 | 94.05 | 30.36 | 14.3 | 61  | 14.6864 | 2.7448 | 860 NDNS    |
| 22209 Male   | 30 | 78.65 | 24.41 | 14.2 | 47  | 10.1613 | 1.9791 | 838.9 NDNS  |
| 22210 Male   | 36 | 94    | 31.08 | 14.8 | 80  | 27.5251 | 4.6314 | 1611 NDNS   |
| 22212 Male   | 46 | 86.85 | 26.09 | 14.8 | 92  | 19.6042 | 1.1373 | 1302.7 NDNS |
| 22215 Female | 29 | 57.6  | 21.21 | 13.4 | 29  | 7.538   | 1.7561 | 794.1 NDNS  |
| 22229 Male   | 47 | 83.9  | 23.24 | 15.3 | 64  | 13.1399 | 7.6499 | 1452.3 NDNS |
| 22301 Male   | 63 | 97.6  | 28.18 | 13.9 | 72  | 9.9443  | 3.8464 | 859.4 NDNS  |
| 22311 Female | 41 | 65.9  | 22.25 | 12.2 | 66  | 11.5294 | 2.2654 | 581.3 NDNS  |
| 22325 Male   | 59 | 90.65 | 27.04 | 13.5 | 327 | 15.9529 | 1.7813 | 824.4 NDNS  |
| 22402 Female | 43 | 61.5  | 24.13 | 13.1 | 37  | 11.0506 | 0.4891 | 869.5 NDNS  |
| 22406 Female | 38 | 79    | 30.52 | 14.2 | 76  | 8.7361  | 1.9058 | 715.4 NDNS  |
| 22407 Male   | 30 | 82.7  | 25.97 | 16.3 | 27  | 11.5332 | 1.4658 | 1238.4 NDNS |
| 22416 Female | 35 | 54.4  | 21    | 13   | 52  | 9.2136  | 1.7482 | 595 NDNS    |
| 22420 Male   | 36 | 103   | 34.22 | 14.7 | 124 | 7.8871  | 1.8801 | 832.7 NDNS  |
| 22421 Female | 39 | 59.3  | 23.47 | 12.3 | 14  | 14.9882 | 0.3524 | 976.1 NDNS  |
| 22425 Male   | 51 | 87.85 | 27.53 | 15   | 109 | 13.4006 | 2.7669 | 799.7 NDNS  |
| 22426 Male   | 40 | 127   | 30.23 | 14.9 | 111 | 8.6972  | 1.8257 | 1014 NDNS   |
| 22429 Male   | 58 | 84.5  | 26.14 | 15.2 | 81  | 14.3087 | 3.2348 | 1141.6 NDNS |
| 22430 Male   | 36 | 89.1  | 30.36 | 16.8 | 136 | 13.632  | 2.9115 | 1013.4 NDNS |
| 22431 Male   | 37 | 82.6  | 28.51 | 15.2 | 38  | 10.7247 | 3.3926 | 984.3 NDNS  |
| 22432 Female | 46 | 52.95 | 21.13 | 12.1 | 27  | 7.5836  | 2.2497 | 704.8 NDNS  |
| 22438 Female | 37 | 80.1  | 29.49 | 14.1 | 17  | 5.2229  | 0.7917 | 687.4 NDNS  |
| 22507 Female | 26 | 50.8  | 19.59 | 13.1 | 35  | 6.7077  | 1.1011 | 741.5 NDNS  |
| 22514 Male   | 30 | 74.8  | 25.24 | 15.2 | 95  | 11.6342 | 3.4733 | 816.9 NDNS  |
| 22517 Male   | 57 | 102.4 | 31.89 | 16.7 | 158 | 19.4487 | 4.2356 | 1104.5 NDNS |
| 22519 Female | 45 | 63.4  | 26.85 | 12.1 | 18  | 7.9164  | 1.5718 | 543.4 NDNS  |
| 22521 Male   | 50 | 73.7  | 25.53 | 14.6 | 80  | 11.6839 | 2.2396 | 750.1 NDNS  |
| 22522 Male   | 53 | 73.4  | 21.47 | 16.3 | 56  | 16.1163 | 0.8711 | 1067.4 NDNS |
| 22523 Female | 40 | 71.3  | 27.27 | 13.5 | 47  | 10.0541 | 1.6561 | 661.7 NDNS  |
| 22526 Male   | 43 | 94.5  | 28.47 | 15.4 | 67  | 14.7152 | 1.3295 | 1580.1 NDNS |
| 22527 Female | 34 | 55.8  | 22.49 | 12.2 | 22  | 7.7064  | 1.6264 | 699 NDNS    |
| 22528 Male   | 36 | 71.9  | 26.35 | 17.7 | 255 | 7.9553  | 0.5114 | 704.9 NDNS  |
| 22533 Female | 51 | 94.7  | 39.52 | 11.4 | 66  | 13.1985 | 2.7381 | 1368.2 NDNS |
| 22536 Female | 64 | 74.3  | 29.65 | 14.8 | 120 | 8.896   | 2.4291 | 1376.9 NDNS |
| 22601 Male   | 50 | 71.6  | 24.34 | 14.5 | 138 | 9.1625  | 3.1306 | 847.8 NDNS  |
| 22605 Male   | 63 | 91.15 | 30.54 | 15.2 | 121 | 13.1805 | 2.2358 | 1016.5 NDNS |
| 22615 Female | 63 | 69    | 27.09 | 14   | 122 | 7.6088  | 0.489  | 993.7 NDNS  |
| 22617 Male   | 62 | 91.3  | 27.99 | 14.1 | 320 | 14.6261 | 3.0415 | 1129.2 NDNS |
| 22620 Female | 39 | 76.8  | 27.99 | 15.3 | 51  | 12.3788 | 0      | 922.2 NDNS  |
| 22625 Female | 60 | 61.4  | 24.43 | 11.9 | 13  | 11.9703 | 1.3844 | 1478 NDNS   |
| 22629 Male   | 51 | 76.7  | 26.34 | 16.4 | 53  | 17.3526 | 2.9798 | 1609.8 NDNS |
| 22706 Male   | 36 | 80.1  | 25.28 | 14.5 | 67  | 14.5524 | 2.3898 | 1157.4 NDNS |

|              |    |        |       |      |     |         |        |             |
|--------------|----|--------|-------|------|-----|---------|--------|-------------|
| 22714 Female | 55 | 83.7   | 34.39 | 14.3 | 30  | 4.9836  | 0.2683 | 776.7 NDNS  |
| 22719 Male   | 44 | 83.5   | 26.83 | 13.7 | 53  | 14.3847 | 7.549  | 764.8 NDNS  |
| 22727 Female | 44 | 97     | 35.67 | 13.3 | 18  | 16.6121 | 0      | 920.7 NDNS  |
| 22738 Female | 61 | 87.2   | 39.54 | 12.8 | 85  | 6.6952  | 1.1536 | 701.3 NDNS  |
| 22739 Female | 42 | 71.3   | 26.8  | 11.5 | 27  | 8.4318  | 1.6391 | 925.4 NDNS  |
| 22802 Male   | 25 | 75.2   | 23.06 | 14.4 | 47  | 19.0225 | 1.5761 | 1126.2 NDNS |
| 22808 Male   | 24 | 91.8   | 28.99 | 15.5 | 118 | 12.263  | 4.4354 | 1072.4 NDNS |
| 22813 Female | 40 | 53.4   | 20.82 | 13.4 | 35  | 7.2356  | 0.6055 | 681 NDNS    |
| 22814 Male   | 41 | 145.9  | 46.1  | 14.1 | 19  | 15.0354 | 1.5663 | 1005.4 NDNS |
| 22817 Male   | 61 | 96.6   | 35.63 | 14.5 | 220 | 6.6017  | 1.7189 | 329.6 NDNS  |
| 22818 Male   | 38 | 68.6   | 22.49 | 12.6 | 53  | 21.201  | 5.5134 | 1887.2 NDNS |
| 22828 Female | 63 | 54     | 21.47 | 14.1 | 64  | 10.9141 | 0.8254 | 912.7 NDNS  |
| 22829 Female | 32 | 69.2   | 28    | 12.2 | 11  | 9.4239  | 1.7036 | 689.8 NDNS  |
| 22830 Female | 45 | 74.6   | 28.27 | 12.8 | 23  | 3.7004  | 0      | 319.6 NDNS  |
| 22831 Male   | 44 | 67.1   | 20.58 | 14.8 | 43  | 13.1285 | 3.9055 | 1245.2 NDNS |
| 22834 Male   | 54 | 92.1   | 32.46 | 14.9 | 104 | 10.3592 | 2.726  | 982.1 NDNS  |
| 22902 Female | 39 | 75.85  | 27.81 | 14.1 | 34  | 19.6839 | 1.2403 | 1214.4 NDNS |
| 22903 Male   | 23 | 61.1   | 20.67 | 14.1 | 84  | 5.7252  | 2.4937 | 511.8 NDNS  |
| 22905 Female | 34 | 64.15  | 24.72 | 13.5 | 50  | 6.5545  | 1.3924 | 484.7 NDNS  |
| 22907 Male   | 36 | 80.35  | 23.2  | 15.7 | 192 | 12.7525 | 3.3357 | 1081.1 NDNS |
| 22911 Female | 40 | 91.95  | 32.37 | 12.7 | 54  | 10.7894 | 1.4432 | 911.1 NDNS  |
| 22913 Female | 27 | 92.7   | 33.64 | 13.9 | 39  | 9.8126  | 1.978  | 718.1 NDNS  |
| 22923 Female | 56 | 75.8   | 27.74 | 13.7 | 22  | 8.3439  | 0.0715 | 653.4 NDNS  |
| 22927 Female | 37 | 68.4   | 25.98 | 13.4 | 40  | 8.6014  | 1.9078 | 1146.3 NDNS |
| 22929 Female | 20 | 90.7   | 35.56 | 14   | 42  | 9.9589  | 3.1052 | 595.5 NDNS  |
| 22934 Female | 33 | 61.3   | 23.87 | 11.5 | 10  | 5.694   | 0.2708 | 865.6 NDNS  |
| 22937 Female | 51 | 64.3   | 24.49 | 12.9 | 21  | 7.2239  | 2.1811 | 496.5 NDNS  |
| 23001 Male   | 60 | 75.4   | 24.34 | 14.1 | 61  | 17.148  | 1.1651 | 1566.8 NDNS |
| 23003 Male   | 57 | 104.55 | 41.38 | 9.8  | 6   | 20.5179 | 1.1725 | 1764.1 NDNS |
| 23009 Male   | 62 | 66.3   | 24.64 | 13.4 | 106 | 16.4647 | 0      | 1646.5 NDNS |
| 23012 Male   | 47 | 94.05  | 30.5  | 16.4 | 157 | 12.9843 | 4.2296 | 699.4 NDNS  |
| 23014 Male   | 32 | 80.9   | 25.02 | 15.7 | 161 | 13.3765 | 3.7017 | 734.8 NDNS  |
| 23018 Female | 54 | 100.55 | 43.26 | 13.4 | 61  | 13.1152 | 0.7435 | 959.4 NDNS  |
| 23027 Female | 31 | 51.8   | 18.19 | 13.1 | 11  | 12.8935 | 0.5829 | 1210.1 NDNS |
| 23028 Male   | 19 | 95.3   | 30.01 | 14.6 | 69  | 9.0551  | 2.565  | 803.9 NDNS  |
| 23109 Male   | 26 | 79.1   | 25.78 | 16.1 | 28  | 14.5234 | 3.1337 | 1135.1 NDNS |
| 23130 Male   | 37 | 103.5  | 36.02 | 14.5 | 69  | 13.9385 | 2.1856 | 1555.6 NDNS |
| 23131 Male   | 62 | 60.2   | 21.59 | 14.6 | 143 | 5.4087  | 1.0586 | 904.7 NDNS  |
| 23135 Female | 61 | 109.75 | 43.01 | 14.7 | 98  | 7.2925  | 2.6619 | 435.1 NDNS  |
| 23137 Male   | 44 | 71.25  | 24.51 | 15.3 | 60  | 16.7594 | 0      | 1514.7 NDNS |
| 23209 Male   | 30 | 107.4  | 28.6  | 14.6 | 108 | 47.6643 | 7.1844 | 1874.5 NDNS |
| 23211 Female | 20 | 68.8   | 27.82 | 13.1 | 11  | 9.2611  | 3.5215 | 721 NDNS    |
| 23219 Female | 61 | 75.65  | 27.54 | 14.4 | 72  | 9.2061  | 1.6145 | 875.9 NDNS  |
| 23224 Male   | 53 | 95.15  | 35.99 | 16.1 | 129 | 15.1582 | 1.7133 | 1035.1 NDNS |
| 23229 Female | 38 | 67.2   | 28.43 | 13.2 | 95  | 7.9949  | 1.5956 | 581.1 NDNS  |
| 23236 Female | 36 | 49.3   | 18.31 | 12.5 | 55  | 7.6741  | 1.2893 | 753.8 NDNS  |
| 23308 Female | 52 | 90.7   | 35.19 | 13   | 66  | 10.924  | 2.373  | 712.5 NDNS  |
| 23312 Female | 57 | 73     | 31.18 | 14   | 104 | 9.319   | 1.2807 | 626 NDNS    |
| 23325 Female | 47 | 95.85  | 37.09 | 15   | 31  | 7.3204  | 1.4016 | 693.8 NDNS  |
| 23326 Male   | 54 | 105.9  | 34.78 | 15.6 | 480 | 7.9152  | 2.5955 | 949.8 NDNS  |
| 23401 Female | 55 | 54.4   | 20.16 | 14.1 | 52  | 19.9156 | 1.2138 | 722.9 NDNS  |
| 23411 Female | 35 | 59.25  | 20.83 | 12.1 | 45  | 13.0101 | 2.8671 | 1040 NDNS   |
| 23425 Male   | 57 | 78.05  | 25.13 | 15.7 | 148 | 12.4925 | 2.2063 | 807.3 NDNS  |
| 23504 Male   | 45 | 72.1   | 22.77 | 15.1 | 122 | 19.1733 | 0.4962 | 1044.4 NDNS |
| 23510 Female | 57 | 73.05  | 28.11 | 13.8 | 76  | 8.8871  | 0.8607 | 1093.9 NDNS |
| 23511 Female | 45 | 109.25 | 43.41 | 16.3 | 101 | 7.4411  | 1.2697 | 480.1 NDNS  |
| 23519 Male   | 56 | 105.3  | 30.31 | 15.2 | 169 | 20.2622 | 4.5626 | 1670.6 NDNS |
| 23520 Female | 33 | 70.05  | 28.97 | 14.1 | 32  | 3.0606  | 1.4727 | 592.5 NDNS  |

|              |    |        |       |      |     |         |        |             |
|--------------|----|--------|-------|------|-----|---------|--------|-------------|
| 23527 Male   | 22 | 67     | 21.13 | 14.4 | 87  | 11.7329 | 2.3781 | 1086.7 NDNS |
| 23610 Female | 36 | 50.9   | 17.79 | 12.1 | 19  | 15.1021 | 0      | 750.1 NDNS  |
| 23620 Male   | 44 | 91.4   | 31.81 | 15.2 | 96  | 12.3839 | 2.1962 | 514.4 NDNS  |
| 23735 Male   | 44 | 115.85 | 34.03 | 17.2 | 166 | 15.3265 | 3.0561 | 1251.5 NDNS |
| 23817 Male   | 62 | 71.95  | 25.21 | 15.4 | 145 | 10.1699 | 1.1832 | 751.9 NDNS  |
| 23819 Female | 21 | 101.1  | 38.83 | 15.6 | 84  | 7.4937  | 2.1163 | 612.1 NDNS  |
| 23822 Male   | 36 | 83     | 27.73 | 15.1 | 97  | 9.0604  | 2.3369 | 658.6 NDNS  |
| 23912 Male   | 52 | 101.9  | 31.61 | 14.1 | 371 | 14.232  | 4.1763 | 887.6 NDNS  |
| 23915 Male   | 41 | 82.8   | 25.22 | 14.3 | 68  | 16.0278 | 1.9718 | 805.8 NDNS  |
| 23917 Female | 43 | 56.9   | 22.62 | 13.5 | 63  | 11.6236 | 2.6666 | 825.2 NDNS  |
| 23918 Male   | 37 | 68.2   | 20.82 | 15.2 | 82  | 9.4368  | 4.4451 | 637.5 NDNS  |
| 23919 Male   | 51 | 98.7   | 34.91 | 15.8 | 197 | 18.6196 | 4.4544 | 1188.4 NDNS |
| 23921 Female | 37 | 71.9   | 25.66 | 14   | 53  | 15.1634 | 1.3596 | 1309.8 NDNS |
| 23930 Male   | 54 | 98.9   | 31.51 | 13.8 | 23  | 10.8115 | 3.0198 | 999.4 NDNS  |
| 23931 Male   | 39 | 80.05  | 27.26 | 14.6 | 166 | 31.6093 | 3.9085 | 1498 NDNS   |
| 23935 Female | 59 | 77.8   | 33.45 | 14.6 | 122 | 9.7864  | 2.3311 | 1120.7 NDNS |
| 23936 Male   | 44 | 90.2   | 32.38 | 15.6 | 542 | 12.574  | 5.7626 | 729.8 NDNS  |
| 24002 Male   | 60 | 104    | 37.65 | 14.4 | 54  | 18.3391 | 7.5202 | 1286.8 NDNS |
| 24003 Female | 33 | 78.7   | 29.6  | 14.4 | 46  | 9.5747  | 1.7969 | 727.3 NDNS  |
| 24008 Male   | 46 | 78.35  | 27.55 | 15.4 | 104 | 5.0499  | 1.5012 | 494.6 NDNS  |
| 24009 Male   | 33 | 61.6   | 19.65 | 14.6 | 85  | 12.631  | 3.4458 | 1040.9 NDNS |
| 24018 Female | 20 | 46.3   | 18.72 | 12.7 | 8   | 10.5735 | 1.5229 | 646.2 NDNS  |
| 24019 Female | 27 | 52.5   | 23.74 | 13.8 | 17  | 9.5626  | 0      | 676.2 NDNS  |
| 24025 Male   | 21 | 82.2   | 25.5  | 14.6 | 23  | 13.0061 | 3.092  | 1417.6 NDNS |
| 24029 Female | 39 | 54.7   | 19.65 | 13   | 6   | 11.2965 | 0.8691 | 861.1 NDNS  |
| 24033 Female | 33 | 78.8   | 31.95 | 13.4 | 63  | 6.5267  | 1.6167 | 418.7 NDNS  |
| 24037 Female | 34 | 70.9   | 25.71 | 14.2 | 23  | 11.1929 | 2.3274 | 1047.6 NDNS |
| 24116 Male   | 63 | 73.2   | 21.98 | 14.8 | 31  | 20.2883 | 0.4075 | 1221.9 NDNS |
| 24121 Female | 43 | 57.8   | 21.52 | 13.4 | 16  | 7.9685  | 0.6095 | 565.2 NDNS  |
| 24135 Male   | 41 | 92.1   | 28.02 | 16.1 | 66  | 13.8571 | 3.0752 | 1200.5 NDNS |
| 24136 Male   | 53 | 71.3   | 22.01 | 14.8 | 236 | 10.5321 | 2.4618 | 772.1 NDNS  |
| 24228 Male   | 41 | 81.6   | 29.14 | 16.6 | 61  | 7.4497  | 2.5528 | 880.8 NDNS  |
| 24305 Female | 42 | 74.7   | 26.63 | 14.6 | 29  | 8.225   | 0.5221 | 1210.2 NDNS |
| 24314 Female | 25 | 57.5   | 21.38 | 14.4 | 21  | 7.7543  | 1.0878 | 631.5 NDNS  |
| 24428 Male   | 37 | 66.5   | 22.35 | 16.6 | 82  | 8.9301  | 1.5547 | 964.6 NDNS  |
| 24437 Female | 30 | 75.1   | 28.83 | 12.5 | 23  | 10.9877 | 0.9621 | 884.5 NDNS  |
| 24439 Female | 41 | 64     | 24.09 |      | 25  | 6.887   | 3.1342 | 436.9 NDNS  |
| 24505 Male   | 32 | 64.95  | 23.93 | 15.8 | 88  | 10.1365 | 4.1645 | 670.8 NDNS  |
| 24511 Male   | 56 | 65.5   | 25.36 | 14.9 | 140 | 13.5814 | 1.3352 | 1385.9 NDNS |
| 24513 Male   | 46 | 95.5   | 31.4  | 13.9 | 19  | 10.3126 | 3.2282 | 845.4 NDNS  |
| 24514 Female | 32 | 63.5   | 24.64 | 13.7 | 11  | 6.0032  | 0.5082 | 867.2 NDNS  |
| 24526 Male   | 64 | 101    | 32.18 | 14.7 | 52  | 11.7009 | 2.9221 | 1045.9 NDNS |
| 24531 Male   | 58 | 69.75  | 22.95 | 15.7 | 182 | 16.677  | 6.2221 | 1353.3 NDNS |
| 24539 Female | 55 | 40     | 15.89 | 15.2 | 28  | 14.743  | 7.6362 | 579.8 NDNS  |
| 24603 Female | 39 | 60.05  | 24.21 | 13.5 | 87  | 11.1496 | 3.1808 | 839.7 NDNS  |
| 24614 Male   | 62 | 74.3   | 24.36 | 15.2 | 253 | 19.9812 | 4.4588 | 1043.8 NDNS |
| 24701 Female | 61 | 58.1   | 25.7  | 11.2 | 49  | 9.3933  | 1.0918 | 747.1 NDNS  |
| 24703 Female | 62 | 120.5  | 40.95 | 14.3 | 352 | 11.274  | 1.8249 | 1140.5 NDNS |
| 24707 Female | 29 | 57.1   | 25.16 | 13.5 | 34  | 8.2271  | 0.5382 | 931 NDNS    |
| 24711 Female | 27 | 48.3   | 19.24 | 13   | 33  | 8.1127  | 2.2374 | 647.3 NDNS  |
| 24717 Female | 54 | 72.85  | 29.86 | 14.9 | 238 | 14.5886 | 5.1699 | 641.8 NDNS  |
| 24724 Male   | 42 | 57.15  | 23.36 | 15.6 | 48  | 22.8665 | 4.2513 | 1134.6 NDNS |
| 24727 Male   | 38 | 109.5  | 34.81 | 15.4 | 237 | 11.1821 | 2.5296 | 816 NDNS    |
| 24730 Female | 62 | 59.5   | 22.35 | 13.3 | 21  | 17.1899 | 1.1289 | 1280.4 NDNS |
| 24733 Female | 57 | 70.9   | 29.74 | 14.2 | 155 | 11.6907 | 3.3516 | 752 NDNS    |
| 24735 Female | 25 | 81.9   | 28.79 | 12.3 | 19  | 13.2169 | 1.8602 | 708.9 NDNS  |
| 24739 Male   | 45 | 62     | 20.99 | 12.8 | 9   | 7.5597  | 2.7201 | 528.4 NDNS  |
| 24809 Female | 63 | 85.25  | 34.61 | 13.9 | 99  | 9.0456  | 2.5839 | 771.9 NDNS  |

|               |    |        |       |      |     |         |          |             |
|---------------|----|--------|-------|------|-----|---------|----------|-------------|
| 24812 Male    | 59 | 77.55  | 27.74 | 15.1 | 74  | 16.4882 | 4.1725   | 1187 NDNS   |
| 24816 Male    | 46 | 75.25  | 28.94 | 15.2 | 211 | 5.1801  | 2.5447   | 686.6 NDNS  |
| 24820 Female  | 45 | 85.6   | 33.19 | 14   | 29  | 8.1755  | 1.283    | 1417.7 NDNS |
| 24832 Male    | 64 | 94.4   | 31.16 | 14.6 | 268 | 10.3533 | 1.7086   | 692.4 NDNS  |
| 24834 Male    | 29 | 105.9  | 32.79 | 14.5 | 257 | 8.8585  | 0.7393   | 906.7 NDNS  |
| 24901 Male    | 58 | 93.8   | 28.29 | 16.3 | 253 | 16.2985 | 2.8114   | 896.5 NDNS  |
| 24911 Female  | 46 | 59.8   | 24.26 | 14.4 | 52  | 14.9273 | 2.0184   | 975.5 NDNS  |
| 24913 Female  | 37 | 76.95  | 28.58 | 13.4 | 34  | 8.6583  | 0.351    | 679.3 NDNS  |
| 24917 Male    | 37 | 87.9   | 27.08 | 15.9 | 84  | 15.1599 | 1.2907   | 1186.5 NDNS |
| 24918 Female  | 40 | 51.5   | 20.85 | 13.7 | 27  | 10.5922 | 1.0823   | 952.8 NDNS  |
| 24928 Female  | 37 | 67.45  | 27.16 | 13.9 | 89  | 8.2298  | 2.169    | 482.2 NDNS  |
| 25002 Female  | 19 | 62.55  | 23.64 | 13.8 | 25  | 12.5976 | 1.2348   | 740 NDNS    |
| 25011 Male    | 51 | 83.85  | 30.87 | 14.6 | 319 | 9.1427  | 1.9592   | 1113 NDNS   |
| 25013 Male    | 61 | 71.4   | 27.19 | 15.1 | 180 | 14.1356 | 2.8875   | 1070.8 NDNS |
| 25019 Male    | 31 | 76.05  | 24.41 | 15   | 86  | 10.1219 | 1.5205   | 1019.9 NDNS |
| 25032 Male    | 45 | 93.95  | 30.87 | 15.4 | 258 | 20.1256 | 3.5831   | 1121.6 NDNS |
| 25033 Female  | 39 | 52.3   | 19.52 | 10.2 | 12  | 7.125   | 1.5731   | 472.8 NDNS  |
| 25034 Female  | 58 | 78.75  | 29.9  | 12.7 | 109 | 10.5293 | 1.5812   | 732 NDNS    |
| 25101 Male    | 22 | 91.85  | 29.25 | 15.6 | 112 | 14.9185 | 5.3207   | 1147.8 NDNS |
| 25107 Male    | 29 | 84.05  | 27.78 | 16.5 | 80  | 11.9728 | 2.4409   | 1802.3 NDNS |
| 25121 Female  | 32 | 46.45  | 20.94 | 13.9 | 38  | 7.4954  | 0.5818   | 450.4 NDNS  |
| 25126 Female  | 25 | 68.2   | 22.96 | 12.5 | 21  | 7.518   | 0        | 704.8 NDNS  |
| 25129 Male    | 62 | 77.35  | 27.89 | 15.3 | 74  | 13.7706 | 0.4271   | 1210.6 NDNS |
| 25205 Male    | 31 | 88.5   | 27.04 | 16.3 | 112 | 19.5795 | 1.1827   | 1498.2 NDNS |
| 25225 Female  | 22 | 64.5   | 23    | 13.8 | 59  | 9.4337  | 1.1126   | 637.9 NDNS  |
| 29904 Male    | 35 | 62.65  | 22.45 | 15.7 | 159 | 12.7908 | 0.6102   | 1716.2 NDNS |
| 29905 Female  | 34 | 114.1  | 42.19 | 13   | 73  | 20.1064 | 1.8929   | 1318.1 NDNS |
| 29908 Male    | 41 | 92.6   | 31.41 |      | 258 | 22.1125 | 3.8071   | 994.3 NDNS  |
| 29909 Female  | 62 | 74.8   | 28.82 | 13.9 | 90  | 9.0177  | 0.4602   | 993.8 NDNS  |
| 29910 Male    | 23 | 66     | 21.42 | 15.8 | 58  | 11.0465 | 5.448    | 676.4 NDNS  |
| 29911 Female  | 31 | 46.5   | 17.43 | 13.9 | 42  | 6.3786  | 0.1828   | 383.4 NDNS  |
| 29914 Female  | 47 | 86.3   | 35.03 | 12.1 | 44  | 14.9084 | 3.0441   | 729.5 NDNS  |
| 29917 Male    | 45 | 76.95  | 26.21 | 15.1 | 51  | 7.003   | 0.8613   | 524.1 NDNS  |
| 29918 Male    | 28 | 109.05 | 30.67 | 15.8 | 68  | 8.9503  | 3.8266   | 692.1 NDNS  |
| 29920 Male    | 24 | 78.5   | 23.45 | 15.8 | 60  | 12.0457 | 1.5828   | 1257.6 NDNS |
| 29921 Female  | 34 | 62.6   | 22.22 | 13   | 37  | 6.0788  | 1.2786   | 535 NDNS    |
| 29923 Male    | 57 | 75.6   | 25.41 | 16.3 | 99  | 14.6409 | 7.0419   | 836.8 NDNS  |
| 29926 Male    | 30 | 106.4  | 33.04 | 16.7 | 158 | 22.6252 | 3.6159   | 1602.9 NDNS |
| 29928 Female  | 53 | 94     | 33.05 | 13.7 | 66  | 14.4777 | 0.6741   | 1060.8 NDNS |
| 29932 Male    | 28 | 77.75  | 22.71 | 15.6 | 167 | 12.7776 | 1.1448   | 1041 NDNS   |
| 29935 Female  | 55 | 81.95  | 29.09 | 14.5 | 33  | 13.9118 | 1.2973   | 1038.1 NDNS |
| 29937 Male    | 52 | 82.8   | 27.01 | 16.6 | 62  | 16.4227 | 1.1326   | 1133.9 NDNS |
| 200001 Male   | 66 | 109    | 32.2  | 15.5 | 210 | 12.29   | 1.386429 | 774 NUAGE   |
| 200002 Female | 65 | 61.8   | 22.4  | 14.2 | 332 | 13.05   | 1.672286 | 885 NUAGE   |
| 200003 Female | 75 | 75.9   | 27.9  | 13.5 | 90  | 12.82   | 1.382857 | 923 NUAGE   |
| 200004 Male   | 74 | 88     | 27.5  | 13.3 | 166 | 18.83   | 2.576571 | 1567 NUAGE  |
| 200005 Male   | 66 | 84.5   | 26.4  | 14.9 | 276 | 12.47   | 0.777143 | 1204 NUAGE  |
| 200007 Female | 69 | 62.3   | 23.7  | 12.8 | 65  | 9.71    | 1.091429 | 933 NUAGE   |
| 200012 Female | 67 | 67.1   | 26.2  | 15.2 | 154 | 11.3    | 0.361429 | 1093 NUAGE  |
| 200013 Female | 65 | 96     | 35.3  | 15.2 | 114 | 18.65   | 1.507429 | 1733 NUAGE  |
| 200014 Female | 66 | 55.6   | 21.2  | 12.9 | 93  | 8.87    | 0.548571 | 948 NUAGE   |
| 200016 Male   | 70 | 76.1   | 22.7  | 15.9 | 114 | 19.74   | 1.051143 | 1184 NUAGE  |
| 200017 Female | 72 | 88.7   | 34.6  | 13.4 | 85  | 11.2    | 0.721857 | 901 NUAGE   |
| 200018 Male   | 71 | 79.8   | 26.1  | 14.5 | 13  | 22.44   | 1.214714 | 553 NUAGE   |
| 200019 Female | 69 | 63.1   | 24.3  | 13.5 | 83  | 15.94   | 0.302857 | 951 NUAGE   |
| 200020 Male   | 75 | 91.1   | 26.3  | 15.5 | 191 | 19.92   | 0.295714 | 1514 NUAGE  |
| 200021 Male   | 73 | 95.4   | 33.4  | 14.4 | 119 | 18.53   | 0.558    | 1071 NUAGE  |
| 200023 Female | 65 | 81.7   | 31.5  | 13.5 | 43  | 14.46   | 1.098143 | 844 NUAGE   |

|               |    |      |      |      |     |       |          |            |
|---------------|----|------|------|------|-----|-------|----------|------------|
| 200025 Female | 68 | 74.7 | 29.9 | 13.6 | 42  | 8.4   | 1.456143 | 548 NUAGE  |
| 200026 Female | 68 | 67.1 | 25.3 | 14.4 | 59  | 9.83  | 0.236286 | 1011 NUAGE |
| 200027 Female | 67 | 85.2 | 30.9 | 13.8 | 81  | 11.96 | 0.204571 | 1156 NUAGE |
| 200028 Female | 74 | 65.5 | 25   | 13.3 | 81  | 8.48  | 1.115286 | 946 NUAGE  |
| 200029 Female | 65 | 64.6 | 25.9 | 13.2 | 14  | 11.2  | 0.919714 | 604 NUAGE  |
| 200030 Female | 68 | 65   | 30.1 | 13.1 | 151 | 11.58 | 3.110857 | 835 NUAGE  |
| 200033 Female | 69 | 81.7 | 29.3 | 12.8 | 8   | 17.36 | 0.717    | 1189 NUAGE |
| 200035 Male   | 67 | 78   | 22.5 | 15.9 | 350 | 15.14 | 2.405286 | 1269 NUAGE |
| 200036 Male   | 69 | 62.6 | 23.6 | 15   | 67  | 8.51  | 0.502857 | 644 NUAGE  |
| 200037 Male   | 70 | 85.5 | 28.9 | 15   | 364 | 9.5   | 1.605286 | 1073 NUAGE |
| 200040 Male   | 69 | 82.2 | 28.8 | 15   | 103 | 13.87 | 0.582    | 908 NUAGE  |
| 200042 Male   | 73 | 88.4 | 30.6 | 14.8 | 75  | 12.11 | 1.799143 | 1316 NUAGE |
| 200043 Male   | 78 | 68   | 23   | 13.3 | 171 | 19.98 | 0.448    | 1491 NUAGE |
| 200046 Male   | 65 | 64.1 | 18.9 | 14   | 123 | 12.24 | 0        | 1152 NUAGE |
| 200047 Female | 65 | 74.8 | 25.6 | 15.2 | 75  | 21.8  | 0        | 1441 NUAGE |
| 200049 Male   | 73 | 73.9 | 24.7 | 15.2 | 165 | 17.46 | 0.337    | 1099 NUAGE |
| 200051 Female | 67 | 74   | 26.2 | 13   | 279 | 15.96 | 0.179429 | 1088 NUAGE |
| 200052 Female | 76 | 66.1 | 25.2 | 12.1 | 48  | 9.3   | 0.516286 | 823 NUAGE  |
| 200053 Female | 66 | 59.3 | 25.3 | 15.2 | 55  | 8.77  | 0.241429 | 1055 NUAGE |
| 200054 Female | 67 | 71.1 | 26.4 | 13.8 | 50  | 12.24 | 1.108571 | 1119 NUAGE |
| 200055 Male   | 66 | 87.2 | 28.8 | 14.7 | 170 | 12.11 | 1.083857 | 860 NUAGE  |
| 200056 Female | 65 | 79.2 | 28.4 | 13.7 | 179 | 10.13 | 1.035857 | 943 NUAGE  |
| 200057 Female | 68 | 55.5 | 24   | 12.8 | 117 | 10.67 | 0.584571 | 1606 NUAGE |
| 200058 Male   | 65 | 94.8 | 30.3 | 13.9 | 80  | 17.5  | 1.202429 | 1623 NUAGE |
| 200059 Female | 70 | 71.2 | 26.8 | 14.4 | 103 | 14    | 0.185143 | 1266 NUAGE |
| 200060 Female | 74 | 99.4 | 37.4 | 13.6 | 81  | 10.04 | 1.492429 | 900 NUAGE  |
| 200063 Female | 67 | 73.2 | 25.9 | 15.3 | 155 | 10.22 | 1.318857 | 960 NUAGE  |
| 200064 Female | 70 | 69.2 | 25.7 | 13.2 | 57  | 13.13 | 0.942429 | 1177 NUAGE |
| 200065 Male   | 76 | 96.4 | 30.4 | 14.5 | 78  | 21.28 | 0.787571 | 1678 NUAGE |
| 200066 Female | 71 | 87.5 | 29.9 | 14.4 | 219 | 9.32  | 2.666857 | 729 NUAGE  |
| 200067 Male   | 70 | 79.4 | 26.5 | 15.4 | 76  | 13.96 | 0.829857 | 1008 NUAGE |
| 200069 Female | 70 | 64.1 | 26.3 | 14.8 | 75  | 10.74 | 0.756714 | 1288 NUAGE |
| 200071 Female | 79 | 59.2 | 25.3 | 13.4 | 45  | 9.59  | 0.444286 | 831 NUAGE  |
| 200072 Female | 73 | 65.9 | 23.9 | 13.4 | 109 | 11.21 | 1.495    | 968 NUAGE  |
| 200073 Female | 68 | 51.4 | 22.8 | 11.8 | 52  | 8.51  | 0.221286 | 1195 NUAGE |
| 200074 Female | 78 | 60.1 | 21.8 | 13.2 | 28  | 11.34 | 0.061429 | 1369 NUAGE |
| 200075 Male   | 70 | 87   | 27.8 | 13.8 | 103 | 12.82 | 1.904714 | 980 NUAGE  |
| 200077 Male   | 69 | 94.9 | 31   | 14.5 | 72  | 14.61 | 1.048571 | 878 NUAGE  |
| 200078 Female | 65 | 80.1 | 30.9 | 14.1 | 58  | 11.4  | 1.086    | 856 NUAGE  |
| 200080 Male   | 66 | 87.8 | 27.1 | 15.3 | 249 | 17.64 | 2.502857 | 1257 NUAGE |
| 200081 Female | 65 | 64.3 | 27.1 | 13.3 | 68  | 8.93  | 1.49     | 852 NUAGE  |
| 200082 Female | 67 | 66.5 | 26.3 | 14.2 | 265 | 10.18 | 1.200572 | 937 NUAGE  |
| 200083 Male   | 79 | 72.5 | 26.3 | 14.5 | 107 | 14.21 | 0.550857 | 1182 NUAGE |
| 200084 Female | 72 | 71.6 | 26.9 | -9   | 23  | 10.41 | 0.809    | 1246 NUAGE |
| 200085 Male   | 68 | 69.4 | 22.7 | 13.9 | 190 | 13.24 | 1.144    | 1302 NUAGE |
| 200086 Female | 68 | 68   | 24.7 | -9   | 132 | 7     | 0.751    | 609 NUAGE  |
| 200087 Female | 68 | 55.6 | 24.1 | 13.5 | 80  | 11.81 | 1.631857 | 1092 NUAGE |
| 200088 Male   | 69 | 78.5 | 27.2 | 13.2 | 150 | 13.63 | 1.822143 | 1269 NUAGE |
| 200090 Male   | 70 | 70.8 | 21.1 | 13.6 | 93  | 25.32 | 0.261714 | 1432 NUAGE |
| 200091 Male   | 66 | 84.9 | 26.5 | 14.7 | 114 | 10.97 | 1.674    | 892 NUAGE  |
| 200092 Female | 69 | 86.1 | 31.2 | 14.6 | 85  | 6.45  | 0.293571 | 888 NUAGE  |
| 200093 Male   | 73 | 87.8 | 29   | 16.7 | 303 | 19.86 | 1.418429 | 1318 NUAGE |
| 200097 Female | 67 | 59.4 | 23.2 | 13.6 | 142 | 12.55 | 0.462143 | 920 NUAGE  |
| 200099 Female | 74 | 73.2 | 29   | 13.1 | 83  | 8.43  | 0.973286 | 705 NUAGE  |
| 200101 Male   | 71 | 79.9 | 22.6 | 14.6 | 72  | 13.11 | 1.291714 | 878 NUAGE  |
| 200103 Male   | 72 | 68.9 | 24.4 | 15.2 | 125 | 10.87 | 1.414057 | 873 NUAGE  |
| 200104 Male   | 76 | 93.9 | 32.5 | 15.3 | 321 | 9.99  | 1.286    | 948 NUAGE  |
| 200105 Female | 65 | 67   | 25.5 | 11.5 | 15  | 13.91 | 0.221143 | 1361 NUAGE |

|               |    |       |      |      |     |       |          |            |
|---------------|----|-------|------|------|-----|-------|----------|------------|
| 200106 Female | 67 | 87.9  | 25.1 | 12.4 | 20  | 12.45 | 0.201714 | 1412 NUAGE |
| 200107 Female | 67 | 61.7  | 23.8 | 13.8 | 133 | 13.85 | 3.133572 | 827 NUAGE  |
| 200108 Female | 66 | 67.6  | 26.7 | -9   | 80  | 20.24 | 0.813571 | 908 NUAGE  |
| 200109 Female | 71 | 58.9  | 24.5 | 13.7 | 52  | 13.53 | 0.382857 | 768 NUAGE  |
| 200110 Male   | 68 | 68.8  | 23.3 | 15.4 | 84  | 15.66 | 0.639286 | 918 NUAGE  |
| 200111 Male   | 69 | 77.1  | 27.6 | 16.4 | 108 | 10.25 | 2.696143 | 1052 NUAGE |
| 200112 Female | 77 | 56.5  | 22.6 | 12.5 | 103 | 14.52 | 0.447571 | 917 NUAGE  |
| 200116 Male   | 65 | 63.5  | 21.5 | 14.9 | 70  | 12.68 | 1.132429 | 749 NUAGE  |
| 200117 Female | 69 | 86.2  | 28.5 | 11.3 | 11  | 10.76 | 0.740286 | 1010 NUAGE |
| 200118 Male   | 67 | 93.8  | 34.9 | 15.5 | 232 | 12.52 | 1.394714 | 874 NUAGE  |
| 200120 Female | 67 | 62.3  | 26.3 | 13.8 | 130 | 11.46 | 0.647857 | 651 NUAGE  |
| 200121 Male   | 69 | 108.9 | 34.4 | 14.4 | 122 | 12.05 | 0.859572 | 912 NUAGE  |
| 200124 Male   | 79 | 92.7  | 29.6 | 15.5 | 72  | 12.8  | 0.974143 | 793 NUAGE  |
| 200127 Female | 65 | 57.7  | 25   | 12.5 | 177 | 14.69 | 0.613857 | 1663 NUAGE |
| 200128 Female | 65 | 78.2  | 28.7 | 12.9 | 90  | 10.77 | 0.488    | 939 NUAGE  |
| 200129 Male   | 71 | 68.2  | 22.8 | 14   | 243 | 16.99 | 0.808    | 1309 NUAGE |
| 200134 Male   | 69 | 83.5  | 24.9 | 12.7 | 66  | 11.66 | 0.203429 | 1470 NUAGE |
| 200135 Female | 68 | 65.8  | 25.7 | 15.1 | 277 | 17.37 | 1.905714 | 1155 NUAGE |
| 200136 Male   | 77 | 84.2  | 30.9 | 14.9 | 127 | 12.98 | 1.478286 | 1039 NUAGE |
| 200138 Female | 71 | 57    | 20.4 | 13.2 | 114 | 8.48  | 0.127714 | 744 NUAGE  |
| 200140 Male   | 65 | 72.9  | 24.6 | 14   | 13  | 16.98 | 1.530743 | 1560 NUAGE |
| 200142 Female | 77 | 72.2  | 29.3 | 13.4 | 113 | 11.56 | 2.041657 | 655 NUAGE  |
| 200146 Female | 67 | 53.8  | 19.8 | 14.1 | 87  | 10.17 | 0        | 989 NUAGE  |
| 200147 Female | 78 | 66    | 26.4 | 13.7 | 25  | 6.98  | 0.390143 | 929 NUAGE  |
| 200148 Male   | 73 | 99.5  | 32.9 | 15.3 | 486 | 13.61 | 3.025    | 1225 NUAGE |
| 200149 Female | 65 | 102.5 | 43.2 | 13.4 | 96  | 7.65  | 1.620857 | 493 NUAGE  |
| 200150 Female | 69 | 49.5  | 19.8 | 13.4 | 71  | 13.39 | 1.456    | 1010 NUAGE |
| 200151 Male   | 68 | 78.3  | 24.4 | 12.7 | 123 | 10.08 | 1.235714 | 921 NUAGE  |
| 200152 Female | 71 | 85.7  | 33.9 | 13.9 | 154 | 9.48  | 0.881857 | 1278 NUAGE |
| 200153 Female | 76 | 70.2  | 28.5 | 13.8 | 90  | 5.99  | 1.108286 | 1037 NUAGE |
| 200154 Male   | 72 | 86.6  | 29.3 | 15.6 | 118 | 14.52 | 0.735286 | 1362 NUAGE |
| 200155 Female | 71 | 70.3  | 29.6 | 12.8 | 33  | 10.35 | 1.189857 | 1084 NUAGE |
| 200156 Female | 70 | 56.2  | 25.3 | 12.6 | 45  | 7.75  | 0.461143 | 677 NUAGE  |
| 200157 Female | 72 | 69.3  | 27.4 | 13.8 | 109 | 10.86 | 2.421714 | 821 NUAGE  |
| 200158 Male   | 73 | 72.3  | 24.7 | 13.8 | 67  | 17.97 | 2.664572 | 1654 NUAGE |
| 200159 Female | 75 | 59.5  | 23   | 13.5 | 111 | 10.14 | 1.898429 | 1135 NUAGE |
| 200162 Male   | 67 | 79.9  | 28.3 | 15.1 | 158 | 13.84 | 1.340429 | 1049 NUAGE |
| 200163 Female | 71 | 54.1  | 22.5 | 13.9 | 167 | 15.41 | 1.619    | 788 NUAGE  |
| 200164 Male   | 73 | 73.8  | 24.1 | 13.9 | 90  | 13.49 | 0.948857 | 1357 NUAGE |
| 200166 Male   | 67 | 71.2  | 22.7 | 15.2 | 80  | 13.17 | 0.756143 | 1399 NUAGE |
| 200168 Female | 70 | 82.1  | 28.7 | 14   | 152 | 8.18  | 1.471571 | 791 NUAGE  |
| 200169 Male   | 66 | 72.8  | 24.6 | 15.4 | 138 | 16.16 | 3.077714 | 1013 NUAGE |
| 200170 Female | 78 | 67.2  | 25.3 | 13.5 | 70  | 13.05 | 0        | 1392 NUAGE |
| 200173 Female | 72 | 63.1  | 22.9 | 12.4 | 82  | 10.13 | 0.683286 | 887 NUAGE  |
| 200176 Male   | 67 | 85.3  | 30.6 | 16.5 | 85  | 15.9  | 0.286857 | 1649 NUAGE |
| 200177 Female | 71 | 48.6  | 21.3 | 13.1 | 46  | 17.29 | 1.180571 | 825 NUAGE  |
| 200178 Female | 66 | 63.5  | 23.6 | 12.7 | 84  | 9.38  | 0.912143 | 1033 NUAGE |
| 200179 Male   | 71 | 77.8  | 24.3 | 14.1 | 332 | 16.42 | 1.389428 | 1394 NUAGE |
| 200180 Female | 67 | 53.8  | 20   | 13.4 | 51  | 12.09 | 1.357429 | 898 NUAGE  |
| 200181 Female | 69 | 65    | 29.7 | 12.7 | 85  | 8.82  | 0        | 840 NUAGE  |
| 200182 Female | 69 | 65.4  | 26.9 | 15   | 236 | 11.42 | 2.984429 | 876 NUAGE  |
| 200183 Male   | 71 | 72.5  | 26   | 14.6 | 264 | 12.92 | 3.064286 | 900 NUAGE  |
| 200184 Female | 71 | 66.9  | 23.4 | 13.6 | 166 | 13.92 | 0.385571 | 1644 NUAGE |
| 200185 Female | 69 | 79.2  | 26.8 | 11.8 | 280 | 8.44  | 1.134143 | 1181 NUAGE |
| 200187 Male   | 70 | 69.5  | 24.6 | 13.9 | 26  | 11.18 | 1.697143 | 964 NUAGE  |
| 200189 Female | 72 | 73.1  | 25.9 | 14   | 96  | 8.81  | 0.32     | 869 NUAGE  |
| 200190 Female | 78 | 62.4  | 24.1 | 12.7 | 66  | 11.04 | 0.114286 | 1286 NUAGE |
| 200191 Male   | 76 | 70.6  | 25   | 13.8 | 129 | 13.56 | 0.9558   | 1370 NUAGE |

|               |    |       |      |      |     |       |          |            |
|---------------|----|-------|------|------|-----|-------|----------|------------|
| 200192 Female | 68 | 67.2  | 25   | 13   | 100 | 10.75 | 0.912657 | 558 NUAGE  |
| 200193 Female | 73 | 77.4  | 29.9 | 13.4 | 230 | 12.14 | 1.244286 | 1034 NUAGE |
| 200194 Male   | 72 | 91.4  | 28.5 | 14.2 | 118 | 18.21 | 1.565571 | 1112 NUAGE |
| 200197 Male   | 66 | 96    | 31   | 14   | 74  | 21.34 | 2.069286 | 1485 NUAGE |
| 200200 Female | 69 | 59.3  | 25   | 13.7 | 107 | 8.16  | 1.197572 | 674 NUAGE  |
| 200201 Female | 67 | 83.8  | 29   | 12.2 | 297 | 12.6  | 1.045143 | 841 NUAGE  |
| 200202 Female | 70 | 80.5  | 27.5 | 13.9 | 188 | 11.36 | 0.929429 | 1228 NUAGE |
| 200204 Female | 69 | 50.7  | 21.1 | 12.6 | 95  | 22.98 | 0.642143 | 1117 NUAGE |
| 200205 Female | 67 | 47.6  | 20.3 | 13   | 66  | 10.64 | 0.985714 | 1031 NUAGE |
| 200206 Male   | 66 | 88.6  | 28   | 15.8 | 127 | 12.69 | 0.621286 | 1622 NUAGE |
| 200207 Female | 70 | 68.3  | 24.2 | 14.9 | 159 | 13.74 | 0.965571 | 1017 NUAGE |
| 200208 Female | 71 | 77.3  | 26.7 | 13.6 | 69  | 9.7   | 0.504857 | 1049 NUAGE |
| 200209 Male   | 79 | 108.9 | 32.9 | 14.4 | 205 | 14.81 | 0.839143 | 1271 NUAGE |
| 200211 Female | 75 | 77.2  | 29.8 | 14.1 | 112 | 11.03 | 1.310429 | 761 NUAGE  |
| 200212 Female | 69 | 63.9  | 25.9 | 13.3 | 55  | 10.52 | 0.764429 | 1309 NUAGE |
| 200214 Male   | 68 | 83.3  | 24.1 | 13.9 | 20  | 17.06 | 2.147572 | 1288 NUAGE |
| 200215 Female | 67 | 52.6  | 22.5 | 13.1 | 76  | 15.4  | 1.600143 | 1167 NUAGE |
| 200216 Female | 66 | 68.5  | 25.5 | 14   | 141 | 17.41 | 1.192143 | 1212 NUAGE |
| 200217 Female | 69 | 66    | 22.8 | 14.2 | 62  | 14.98 | 1.694429 | 1010 NUAGE |
| 200219 Female | 68 | 57.8  | 23.4 | 12.8 | 56  | 11.86 | 0.336429 | 1035 NUAGE |
| 200220 Male   | 70 | 89.4  | 30.2 | 14   | 117 | 10.71 | 0.459286 | 860 NUAGE  |
| 200224 Female | 77 | 62    | 25.5 | 15.6 | 88  | 14.77 | 1.229857 | 1033 NUAGE |
| 200225 Male   | 72 | 78.9  | 27   | 14.5 | 507 | 10.14 | 1.098857 | 525 NUAGE  |
| 200226 Male   | 76 | 74.3  | 24   | 13.1 | 42  | 13.48 | 2.884286 | 950 NUAGE  |
| 200228 Female | 76 | 73.7  | 29.2 | 12.8 | 53  | 8.28  | 0.565714 | 1036 NUAGE |
| 200229 Female | 76 | 65.3  | 25.8 | 14.5 | 112 | 15.49 | 1.093    | 1015 NUAGE |
| 200231 Female | 70 | 66.8  | 27.4 | 12.9 | 16  | 10.9  | 1.040143 | 735 NUAGE  |
| 200232 Male   | 69 | 109.1 | 28.4 | 15.6 | 240 | 11.11 | 1.428571 | 836 NUAGE  |
| 200233 Female | 66 | 67.4  | 27.3 | 14   | 137 | 8.91  | 0.808857 | 607 NUAGE  |
| 200234 Male   | 65 | 63.8  | 20.6 | 13.6 | 56  | 13.32 | 2.188143 | 770 NUAGE  |
| 200237 Female | 69 | 61.3  | 22.5 | 12.4 | 89  | 14.36 | 1.592    | 1119 NUAGE |
| 200238 Male   | 65 | 58.7  | 18.5 | 15   | 27  | 12.35 | 0.698571 | 1087 NUAGE |
| 200239 Female | 66 | 58    | 24.1 | 14.6 | 24  | 13.44 | 0.931    | 1235 NUAGE |
| 200240 Female | 77 | 62.4  | 25   | 13.7 | 87  | 8.79  | 0.139857 | 1077 NUAGE |
| 200241 Male   | 72 | 71.4  | 24.7 | 15.1 | 61  | 11.7  | 0.303714 | 1591 NUAGE |
| 200243 Male   | 65 | 101.7 | 34   | 15.3 | 187 | 15.69 | 0.967143 | 468 NUAGE  |
| 200247 Female | 66 | 78.6  | 26.3 | 15   | 111 | 11.23 | 1.434857 | 983 NUAGE  |
| 200248 Female | 76 | 74.7  | 31.5 | 13   | 172 | 12.15 | 0.157143 | 1051 NUAGE |
| 200250 Male   | 74 | 96.8  | 31.3 | 13.8 | 30  | 7.56  | 0.08     | 1104 NUAGE |
| 200251 Male   | 69 | 81.3  | 27.5 | 14.8 | 39  | 12    | 3.446857 | 758 NUAGE  |
| 200252 Male   | 78 | 88.4  | 31.3 | 14.8 | 205 | 13.51 | 0.872714 | 1126 NUAGE |
| 200253 Male   | 71 | 66.6  | 23.6 | 14.8 | 302 | 14.26 | 3.812143 | 1153 NUAGE |
| 200254 Male   | 70 | 74.4  | 25.7 | 14.1 | 106 | 12.6  | 0.945714 | 1506 NUAGE |
| 200256 Male   | 67 | 94.2  | 27.5 | 14.5 | 72  | 14.79 | 0.588571 | 1202 NUAGE |
| 200259 Female | 77 | 67.2  | 27.3 | 12.5 | 95  | 8.42  | 0.580143 | 666 NUAGE  |
| 200260 Male   | 68 | 89    | 27.8 | 16.5 | 123 | 11.72 | 1.247    | 1012 NUAGE |
| 200261 Female | 72 | 84.7  | 31.5 | 13.5 | 131 | 7.15  | 0.138286 | 455 NUAGE  |
| 200262 Male   | 67 | 69.6  | 26.9 | 15   | 261 | 13.18 | 0.753572 | 1502 NUAGE |
| 200263 Female | 66 | 70.9  | 26   | 14.5 | 124 | 9.36  | 0.42     | 1215 NUAGE |
| 200264 Female | 69 | 70.1  | 28.4 | 13.7 | 244 | 10.74 | 0.861429 | 881 NUAGE  |
| 200267 Male   | 72 | 108.1 | 33.7 | 14   | 194 | 13.93 | 0.543572 | 1347 NUAGE |
| 200268 Female | 78 | 84.8  | 33.5 | 13.9 | 165 | 9.92  | 0.868857 | 977 NUAGE  |
| 200269 Female | 66 | 65    | 30.1 | 12.7 | 87  | 9.38  | 0.571429 | 734 NUAGE  |
| 200271 Female | 78 | 79.7  | 28.6 | 12.8 | 197 | 13.62 | 1.470714 | 991 NUAGE  |
| 200272 Female | 72 | 63    | 24.9 | 13   | 280 | 10.88 | 0.853857 | 814 NUAGE  |
| 200275 Female | 65 | 85.8  | 30.4 | 13.5 | 93  | 12.34 | 1.219857 | 969 NUAGE  |
| 200276 Female | 68 | 61.3  | 24.6 | 14.1 | 97  | 11.77 | 0.666    | 779 NUAGE  |
| 200277 Female | 67 | 62.9  | 20.8 | 12.5 | 127 | 8.85  | 1.13     | 957 NUAGE  |



|               |    |      |      |      |    |       |          |            |
|---------------|----|------|------|------|----|-------|----------|------------|
| 200280 Female | 67 | 70.1 | 26.1 | 12.7 | 26 | 12.68 | 2.427286 | 1011 NUAGE |
| 200281 Female | 71 | 78.9 | 28.3 | 13.4 | 33 | 16.96 | 2.819429 | 1247 NUAGE |
| 200283 Male   | 68 | 79.2 | 28.4 | 14.1 | 57 | 11.11 | 0.644286 | 1240 NUAGE |
| 200284 Female | 66 | 51.2 | 21   | 12.7 | 37 | 9.78  | 0.296571 | 991 NUAGE  |
| 200285 Female | 69 | 69.4 | 24.9 | 11.7 | 58 | 13    | 0.846286 | 1084 NUAGE |
| 200287 Female | 67 | 69.6 | 24.7 | 14   | 47 | 13.63 | 0        | 987 NUAGE  |
